# Supplementary material for: An efficient route to regioselective functionalization of benzo[b]thiophenes via palladium-catalyzed decarboxylative Heck coupling reactions: insights from experiment and computation
Source: Royal Society of Chemistry journal article supplement (doi:10.1039/c5ob01905b), 2015-11-17
Supplement: c5ob01905b1.pdf [file c5ob01905b1.pdf]

# Supporting Information

## An Efficient Route to Regioselective Functionalization of Benzo[*b*]thiophenes via Palladium-Catalyzed Decarboxylative Heck Coupling Reactions: Insights from Experiment and Computation

Daoshan Yang,<sup>‡</sup> Yuxia, Liu,<sup>‡</sup> Pengfei Sun, Ning Zhang, Wei Wei, Mingyang, Sun, Guang Chen, Siwei Bi, and Hua Wang\*

The Key Laboratory of Life-Organic Analysis and Key Laboratory of Pharmaceutical Intermediates and Analysis of Natural Medicine, School of Chemistry and Chemical Engineering, Qufu Normal University, Qufu 273165, Shandong P. R. China. \*E-mail: huawang\_qfnu@126.com

<sup>‡</sup>*Authors with equal contribution.*

### Table of Contents

|                                                                             |     |
|-----------------------------------------------------------------------------|-----|
| Synthesis of 3-chlorobenzo[ <i>b</i> ]thiophene-2-carboxylic acids          | P2  |
| The <sup>1</sup> H and <sup>13</sup> C NMR spectra of compounds <b>3a-y</b> | P3  |
| <b>Computational Section</b>                                                | P25 |

## General Procedure for Preparation of 3-chlorobenzo[*b*]thiophene-2-carboxylic acids!<sup>1</sup>

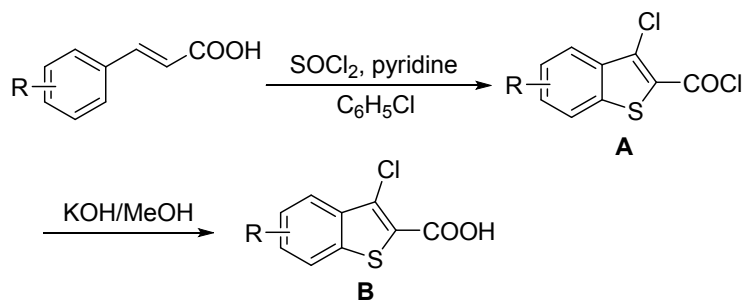

To a solution of chlorobenzene (30 mL) was added cinnamic acid (50 mmol), pyridine (0.4 mL, 5 mmol), thionyl chloride (15 mL, 77 mol), the mixture was heated at reflux for 3 days. Excess thionyl chloride was removed under reduced pressure and the remaining material was suspended in hot hexane then filtered. The hot filtrate was treated with charcoal, allowed to cool, then the precipitate collected by filtration to give **A**. Hydrolysis of **A** in the presence of KOH and methanol, then acidified the mixture with HCl gave the product **B**.

### Reference:

1. Higa, T. *J. Org. Chem.* **1975**, *40*, 3037–3045.

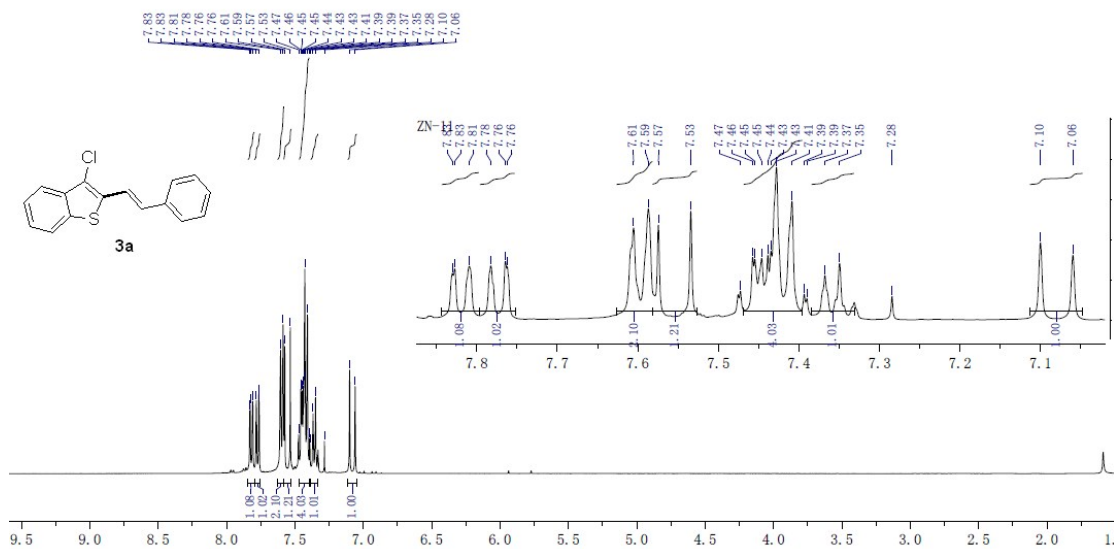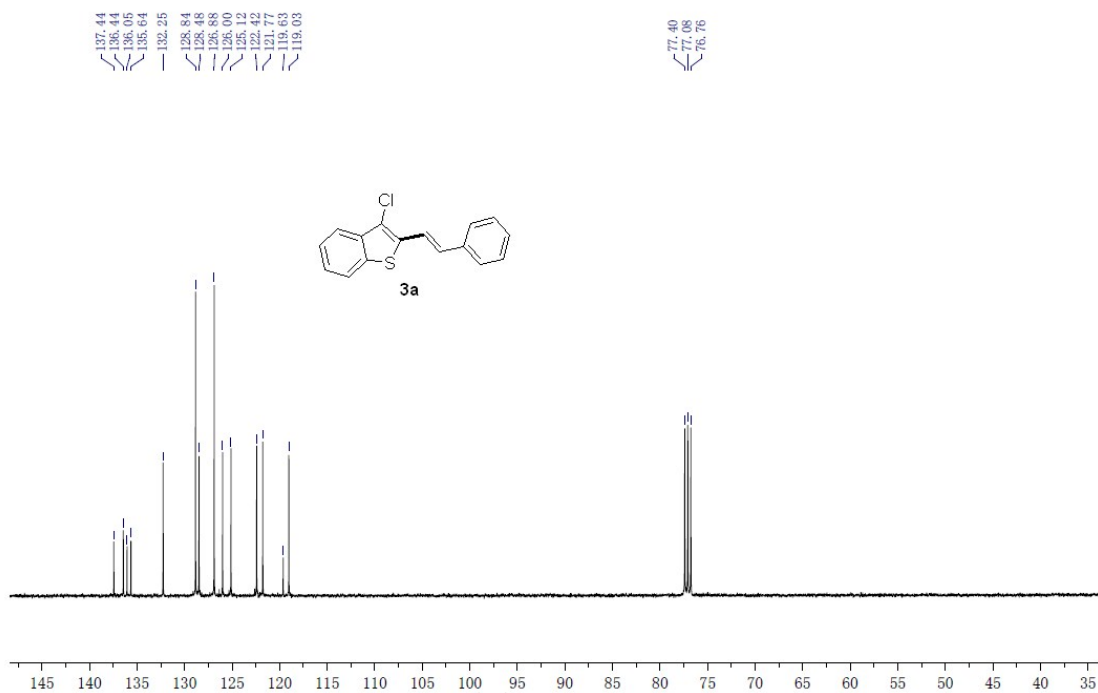

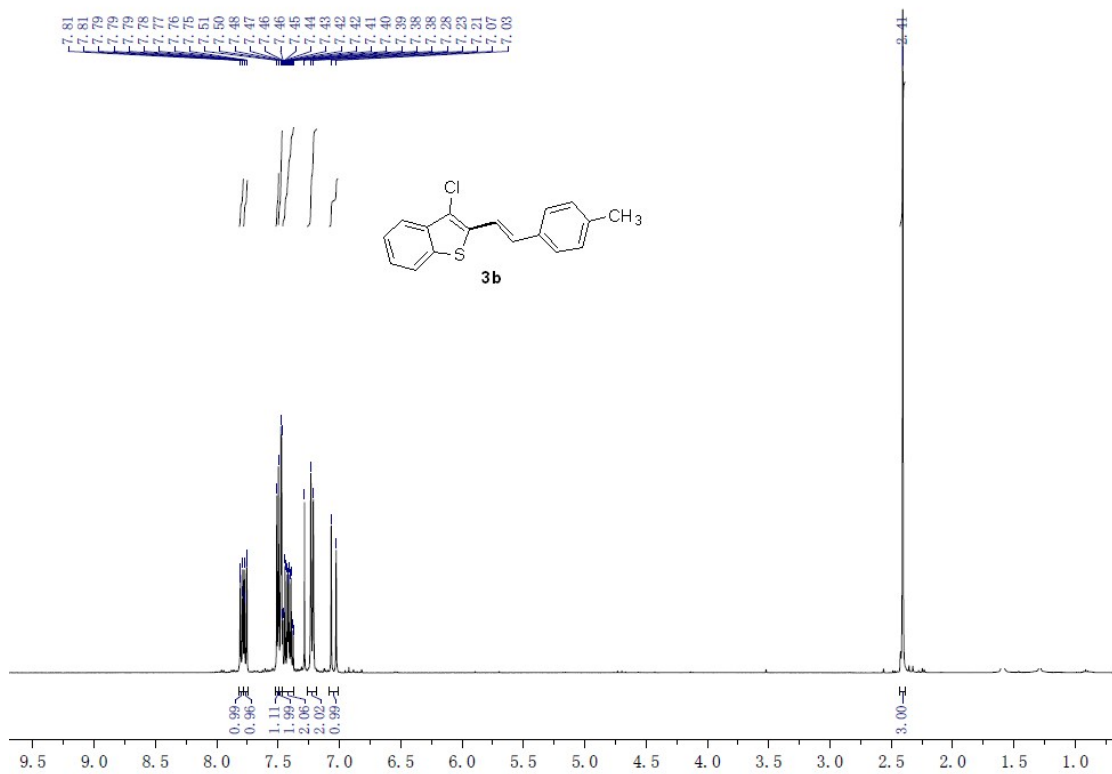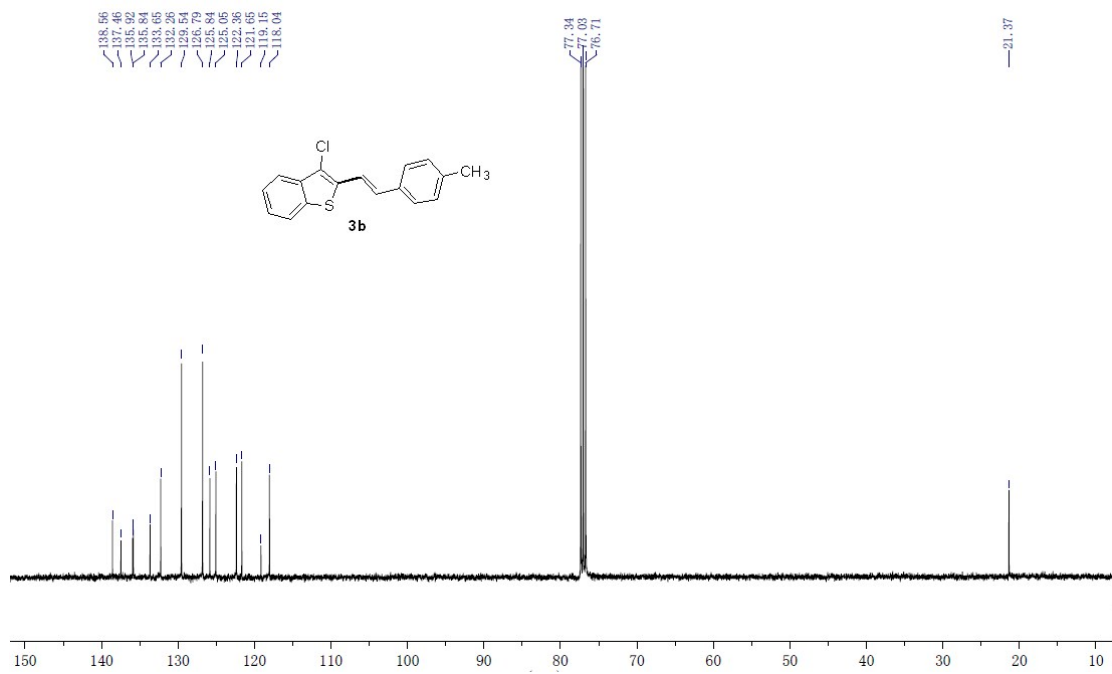

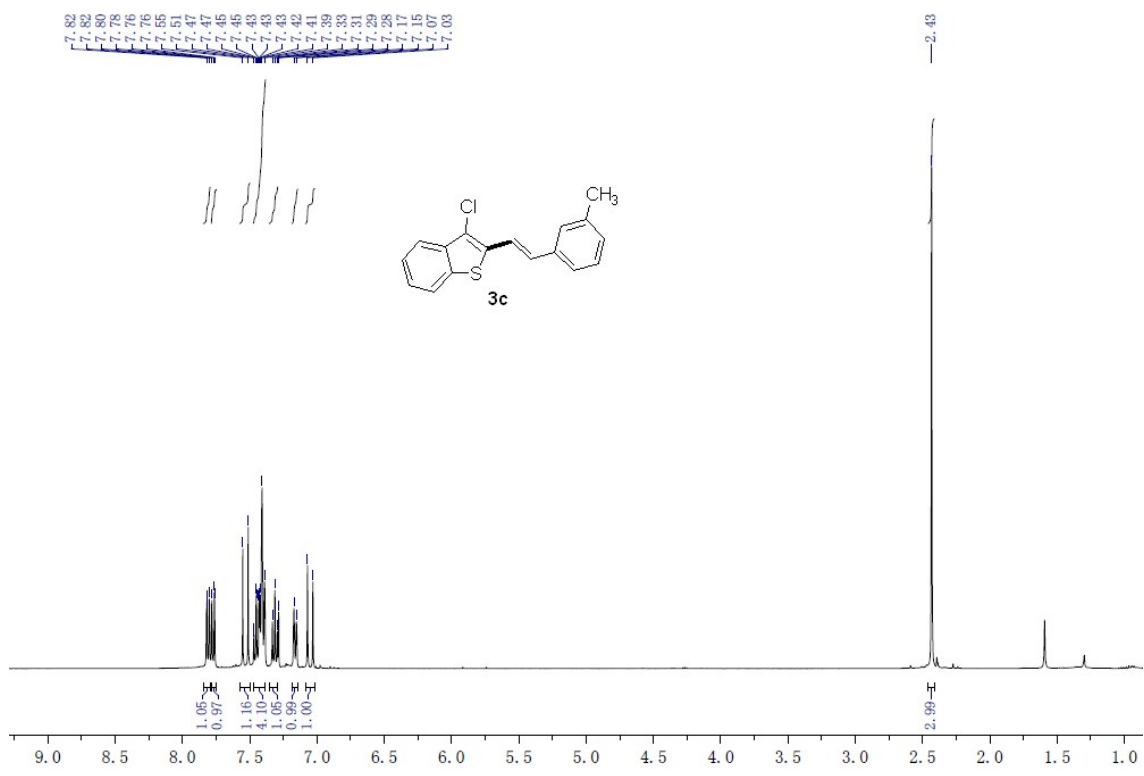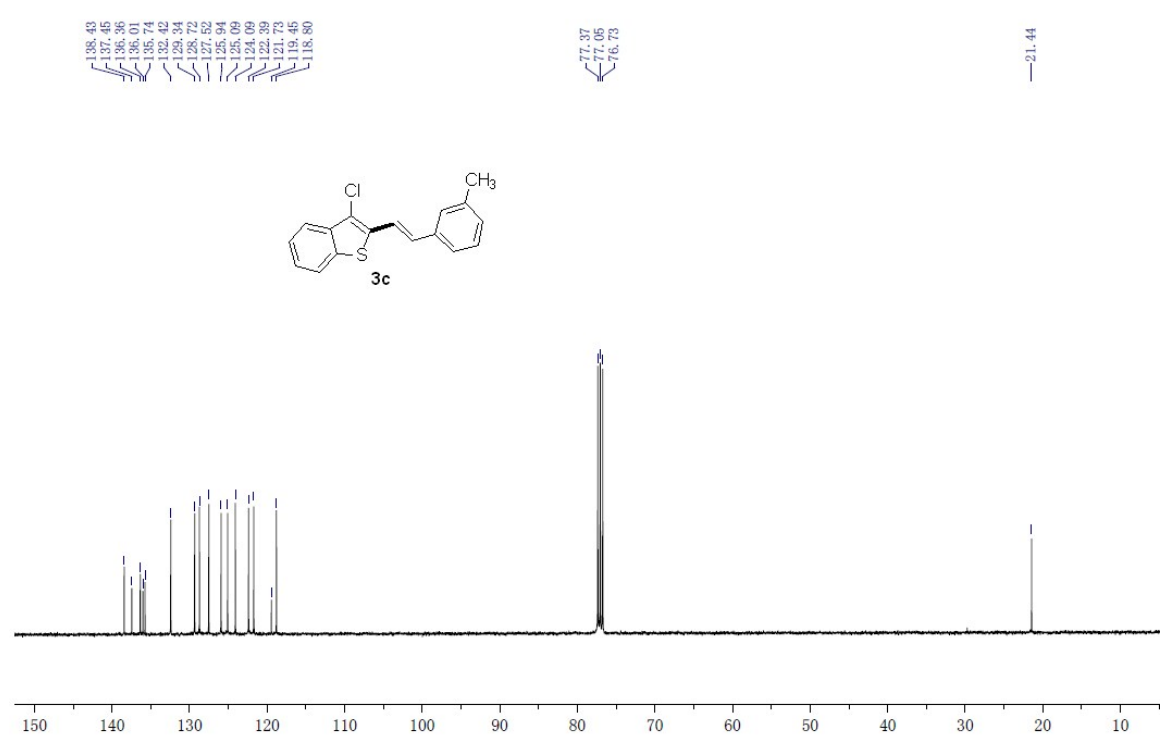

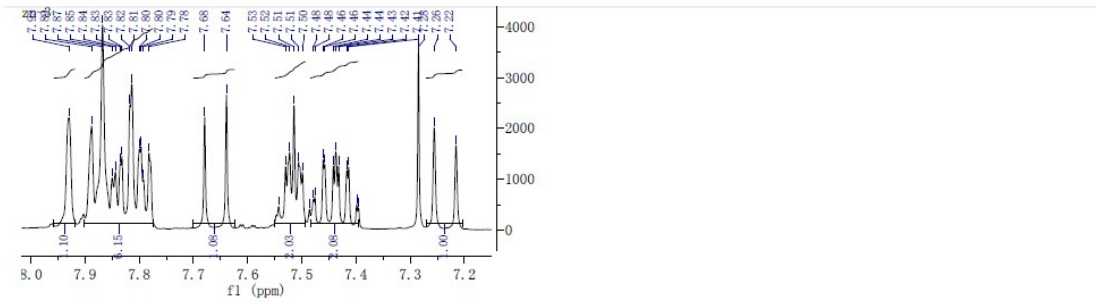

zn-3  
 7.93, 7.89, 7.84, 7.83, 7.81, 7.79, 7.78, 7.68, 7.53, 7.52, 7.51, 7.50, 7.48, 7.46, 7.44, 7.43, 7.36, 7.23

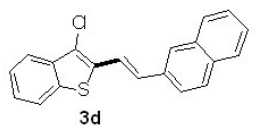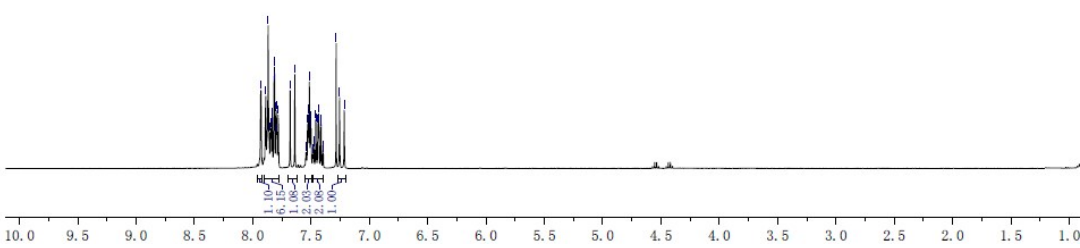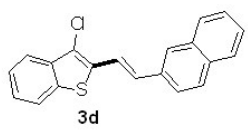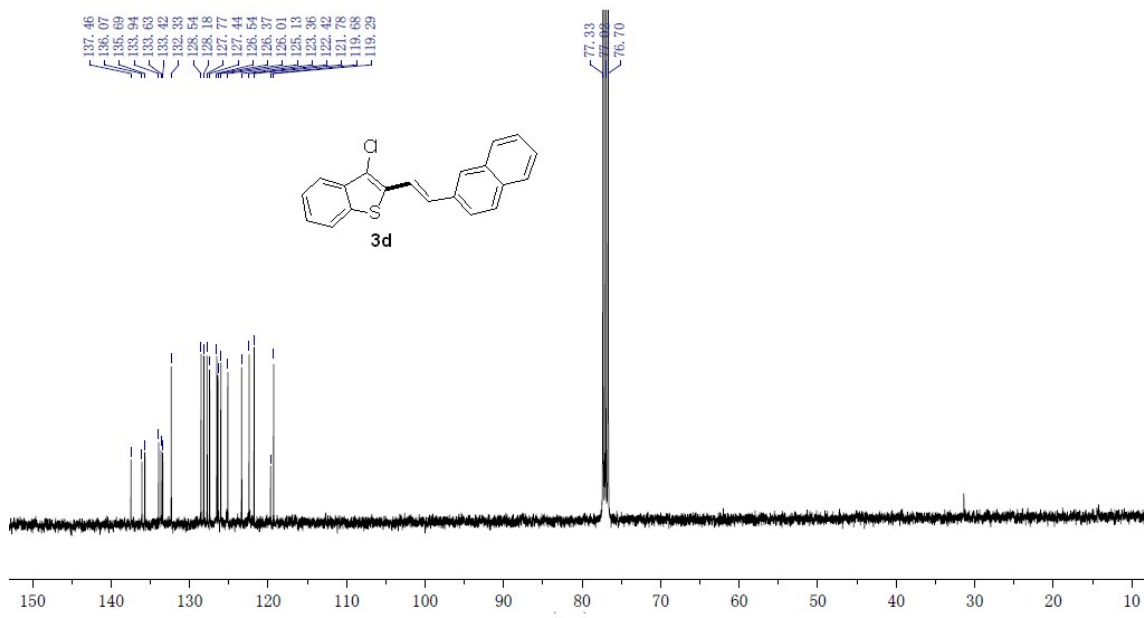

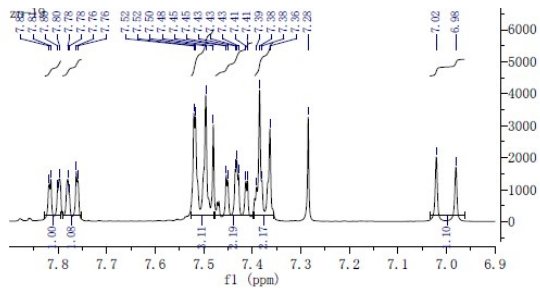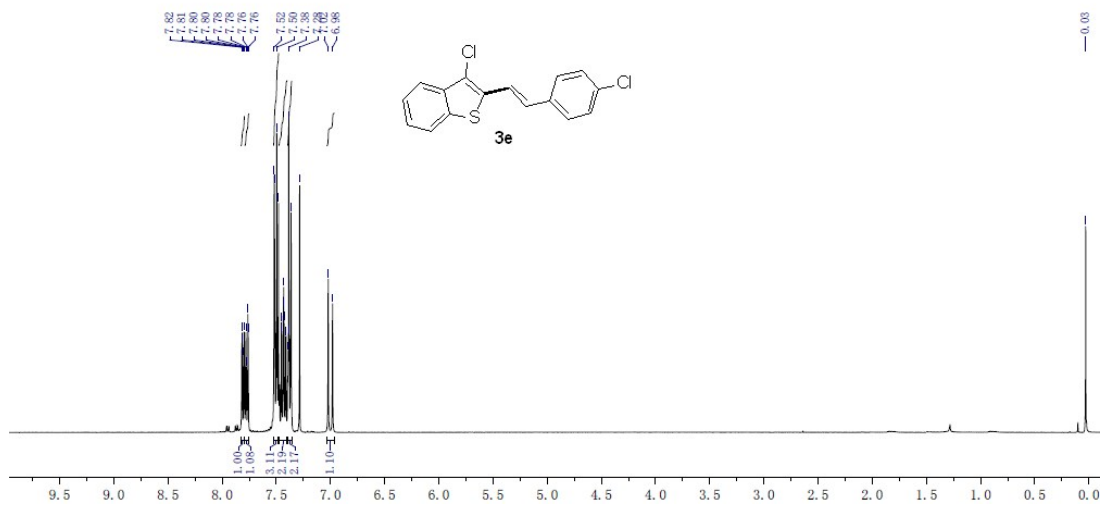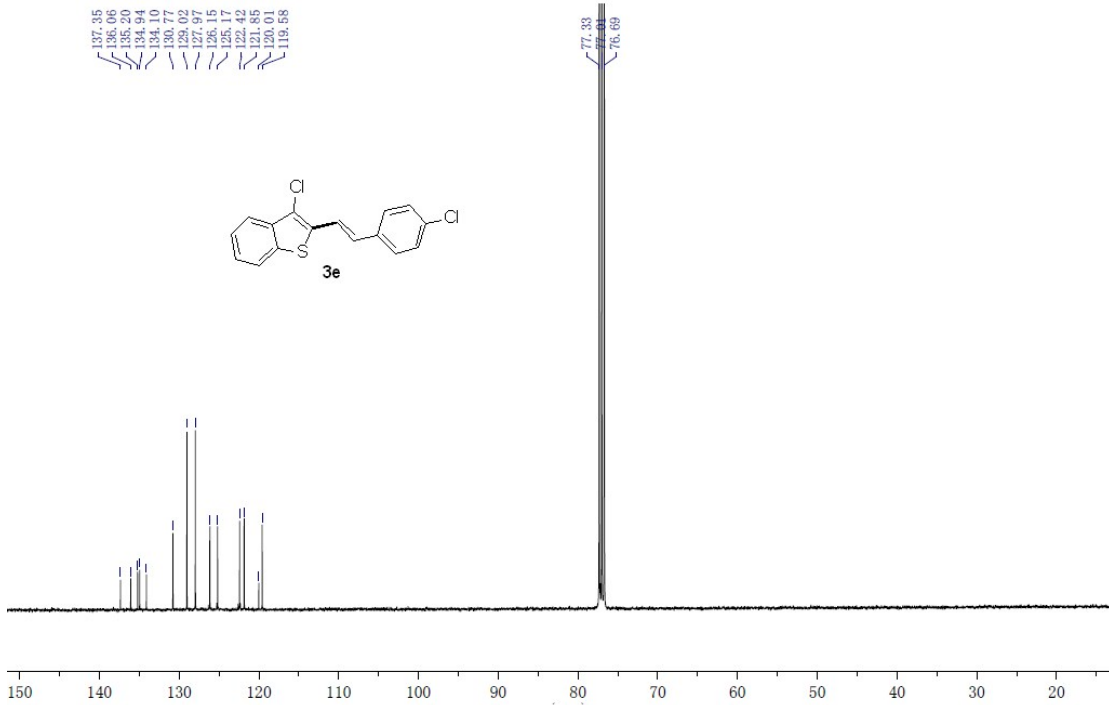

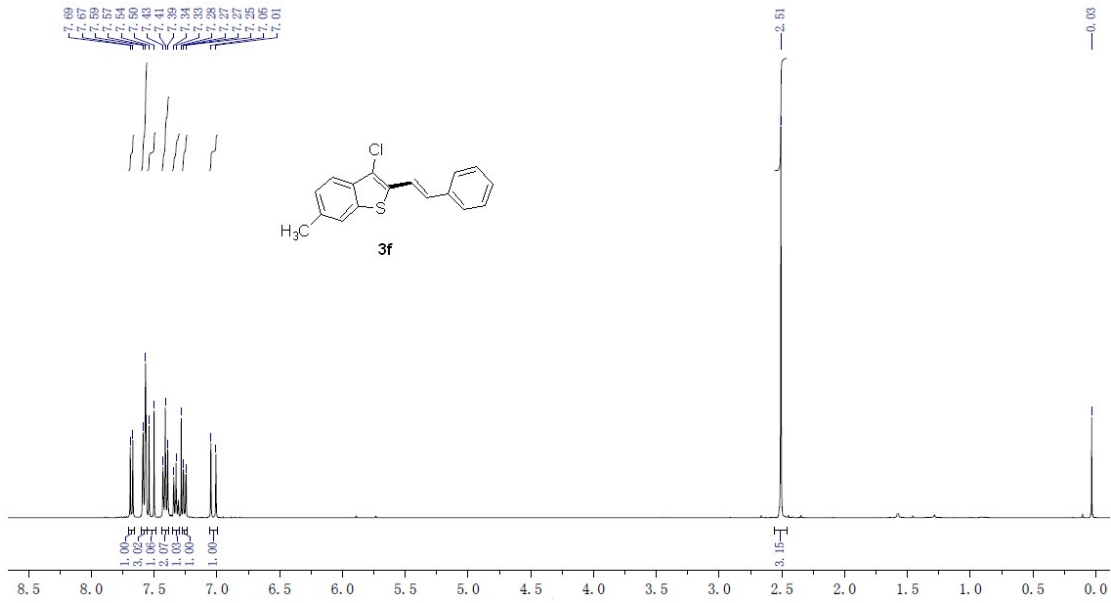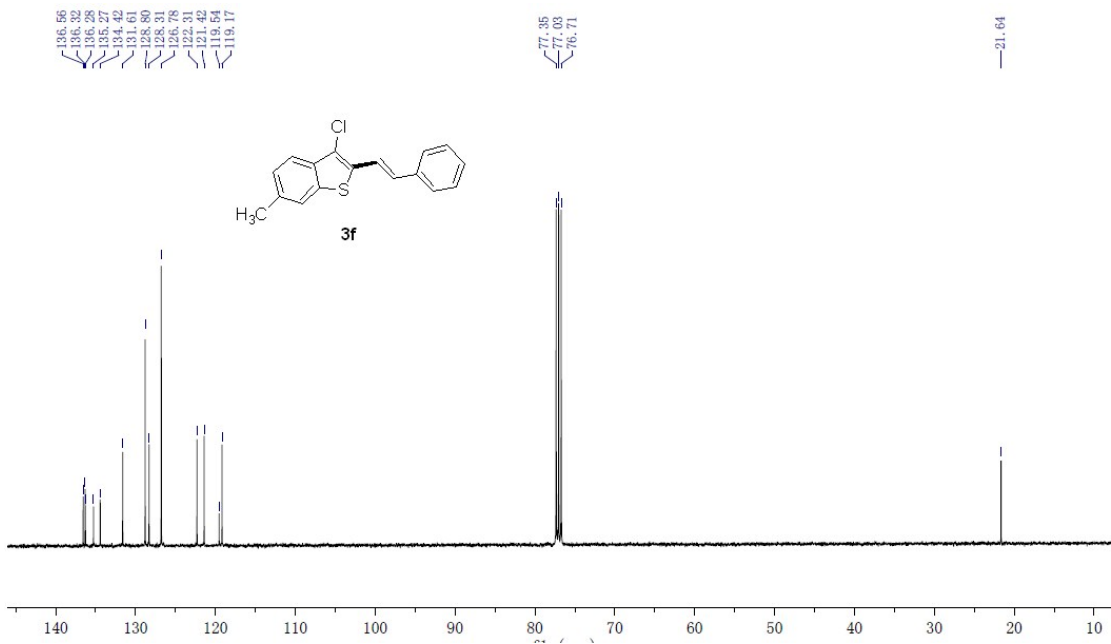



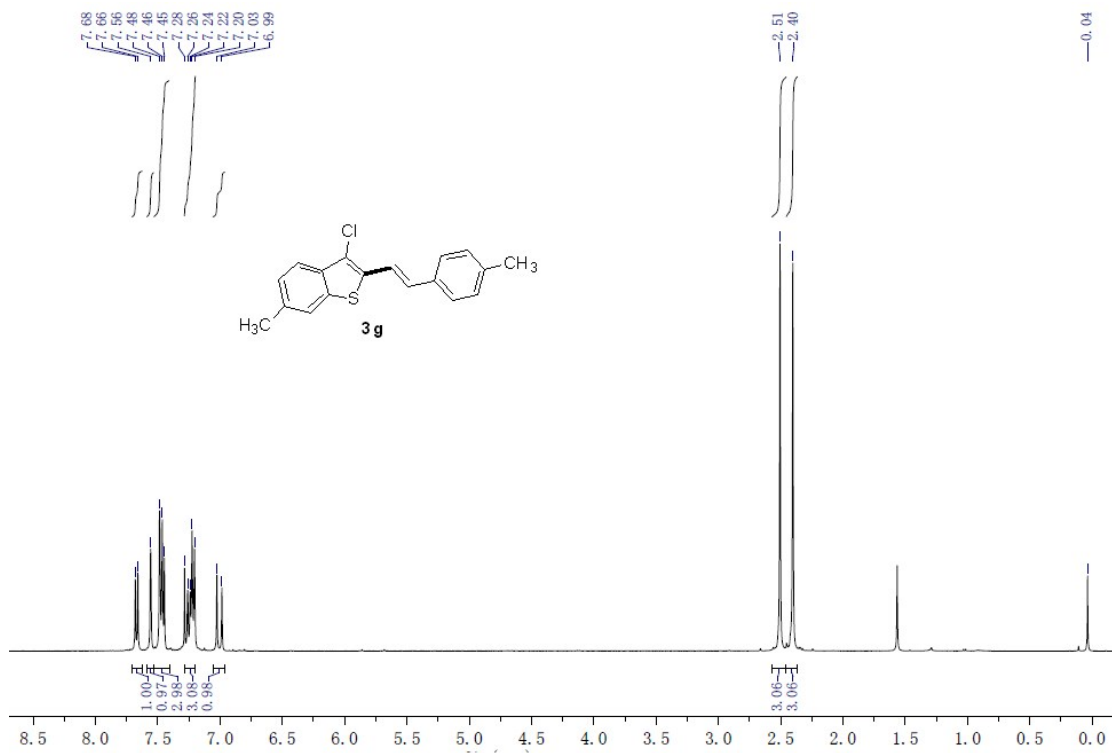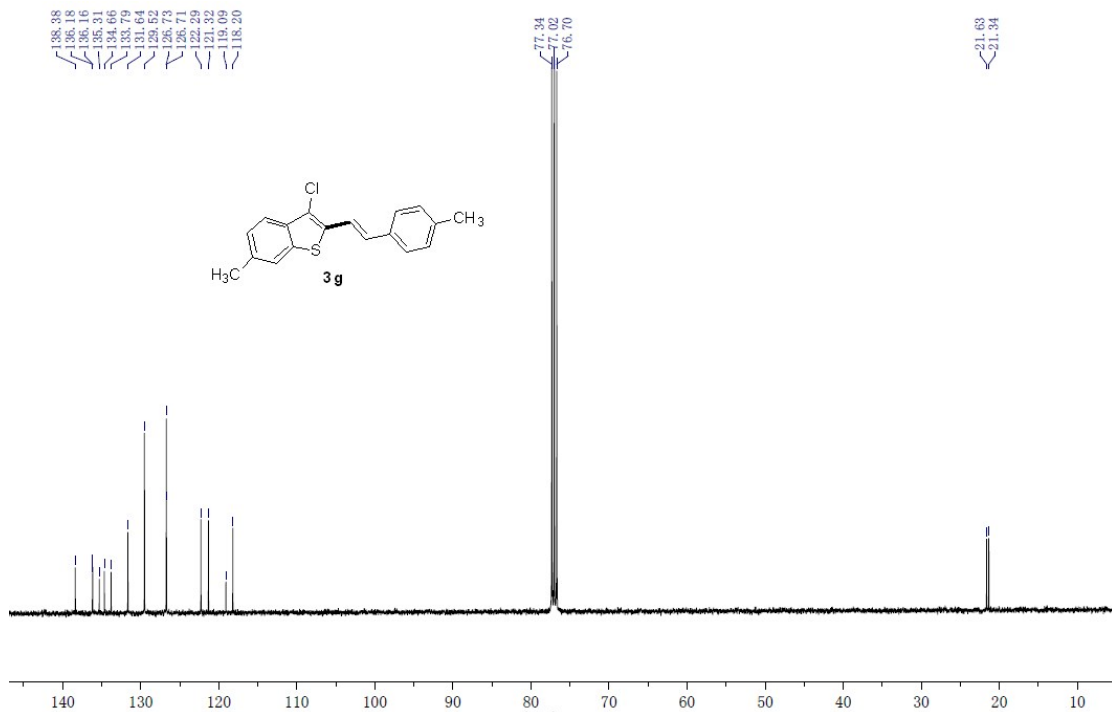

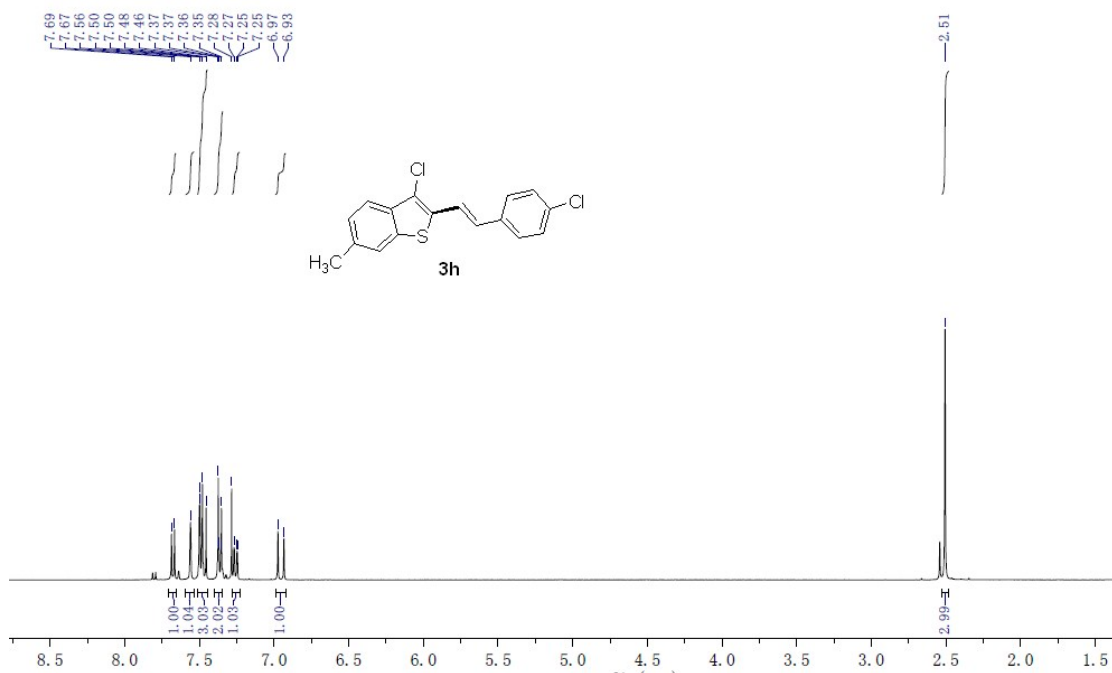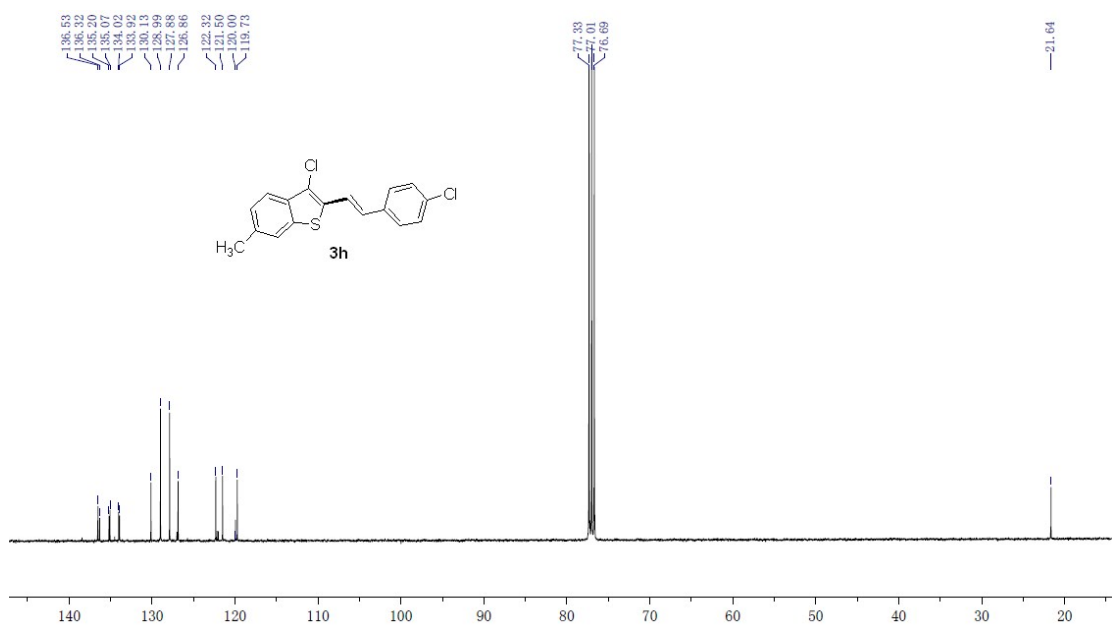

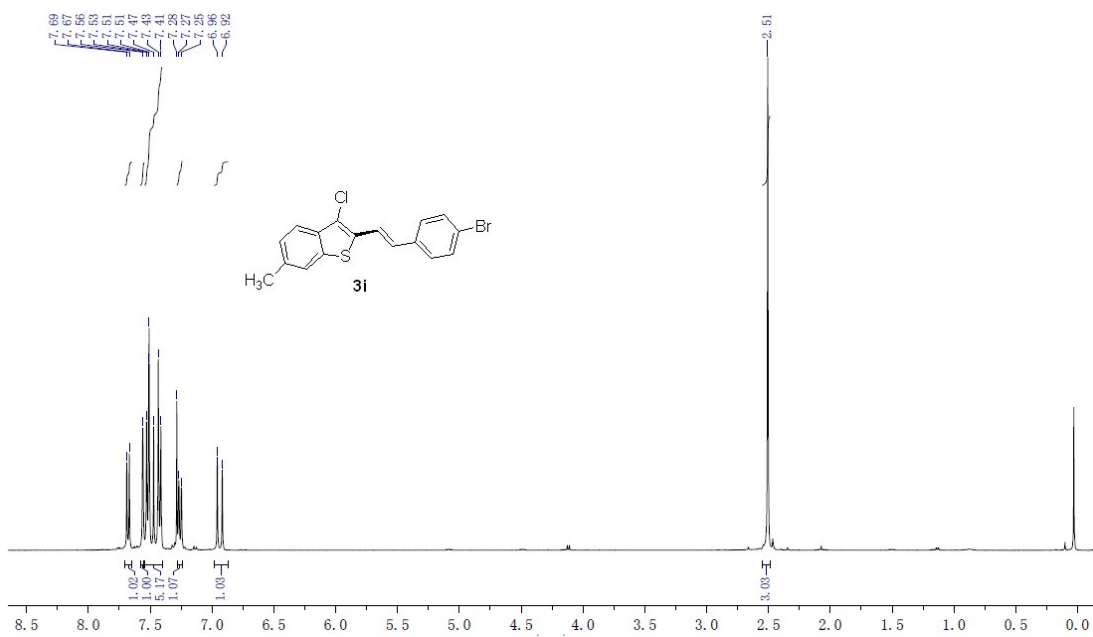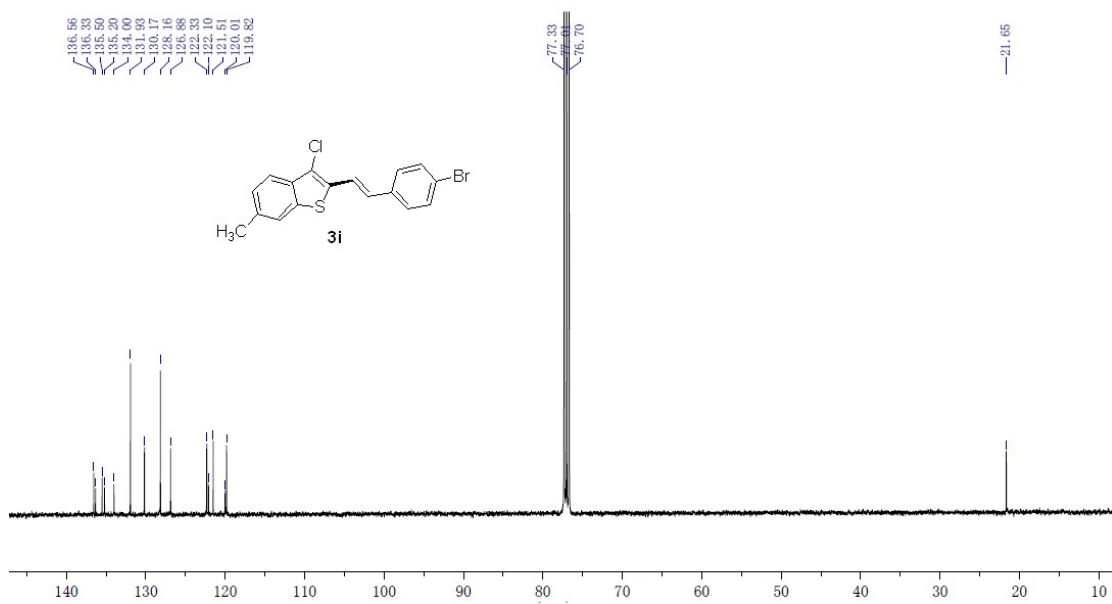

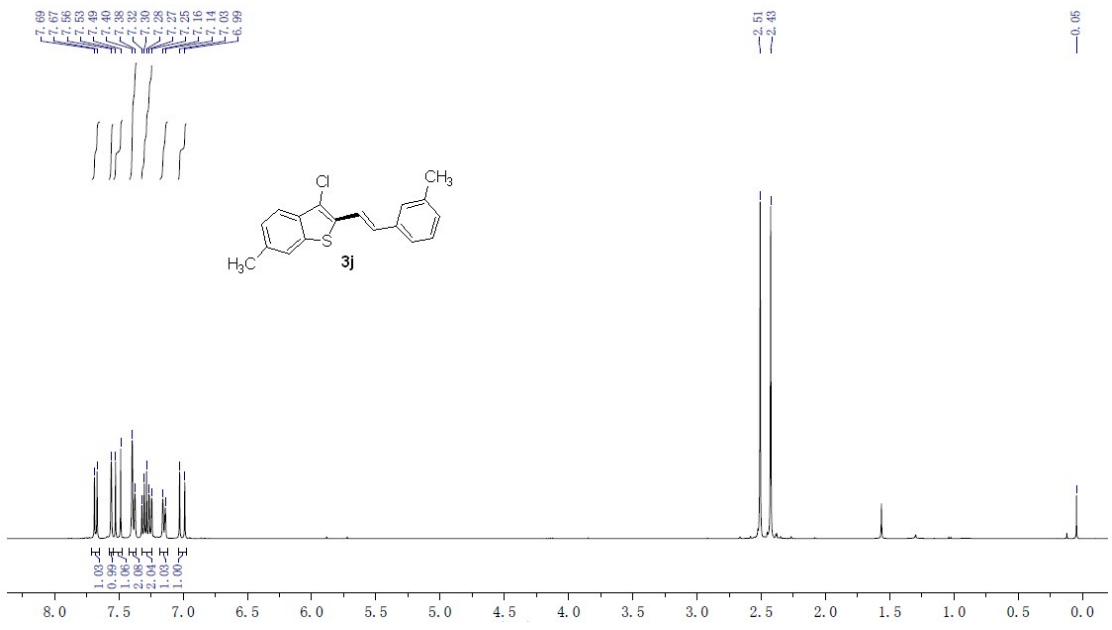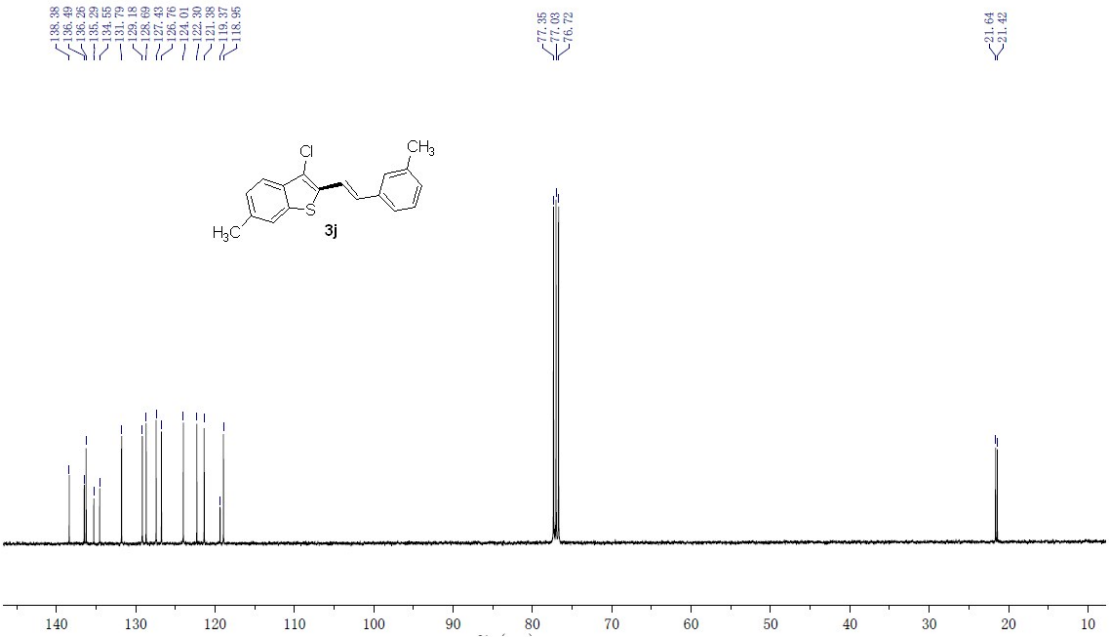

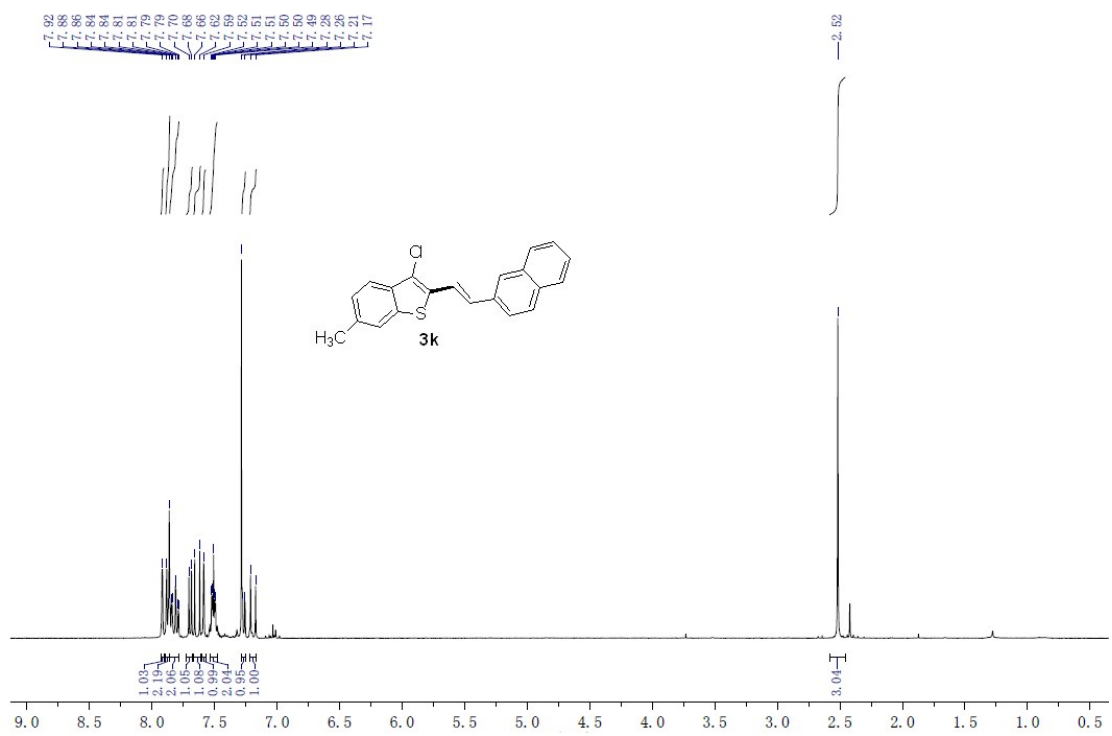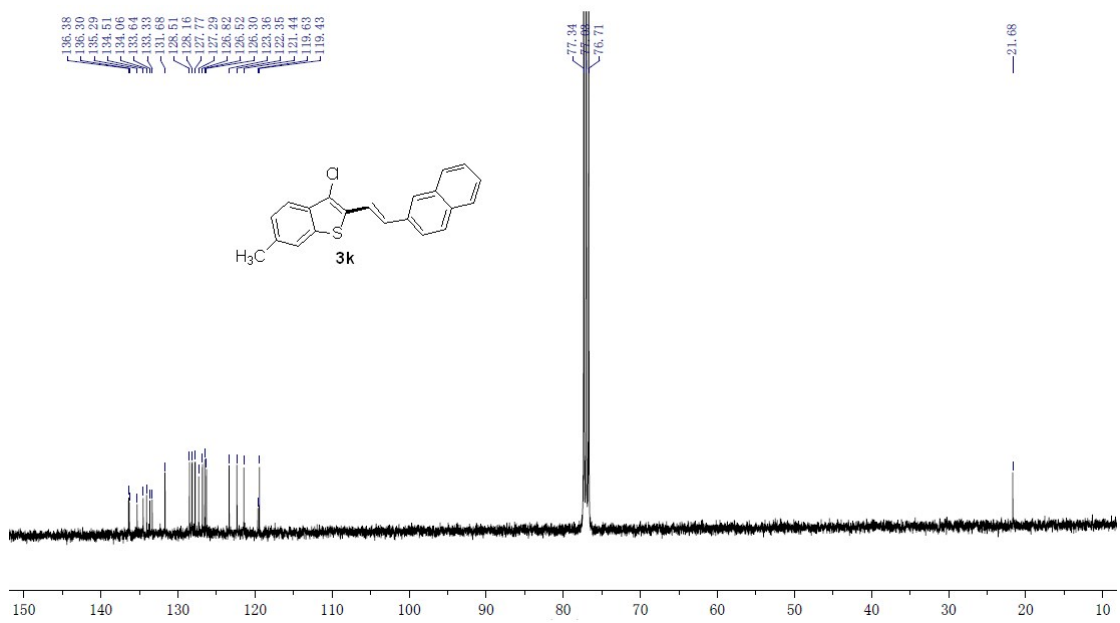



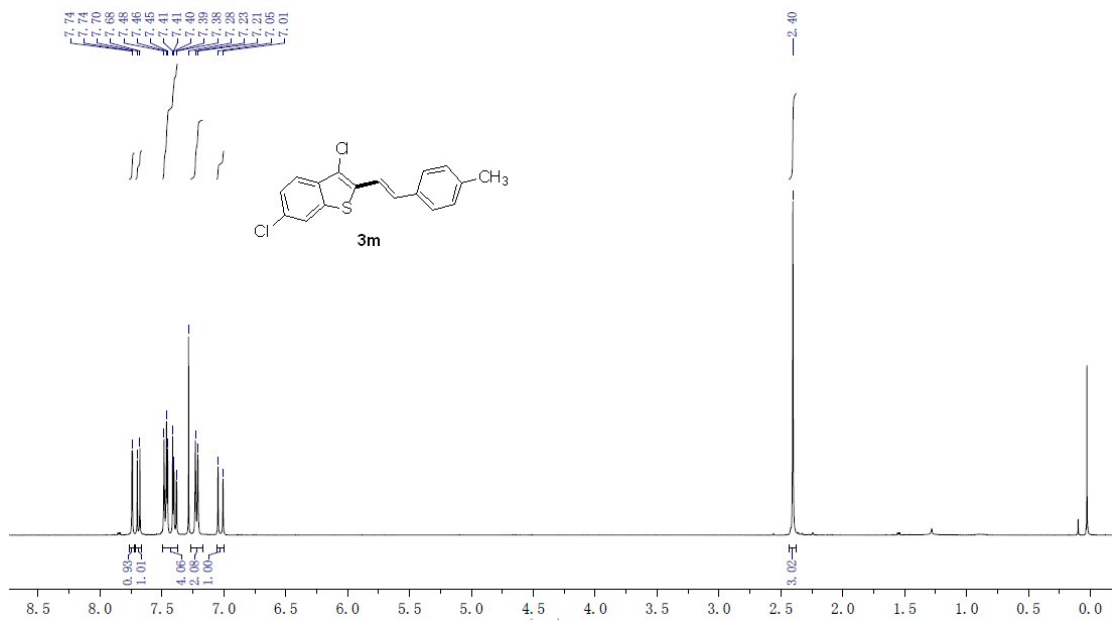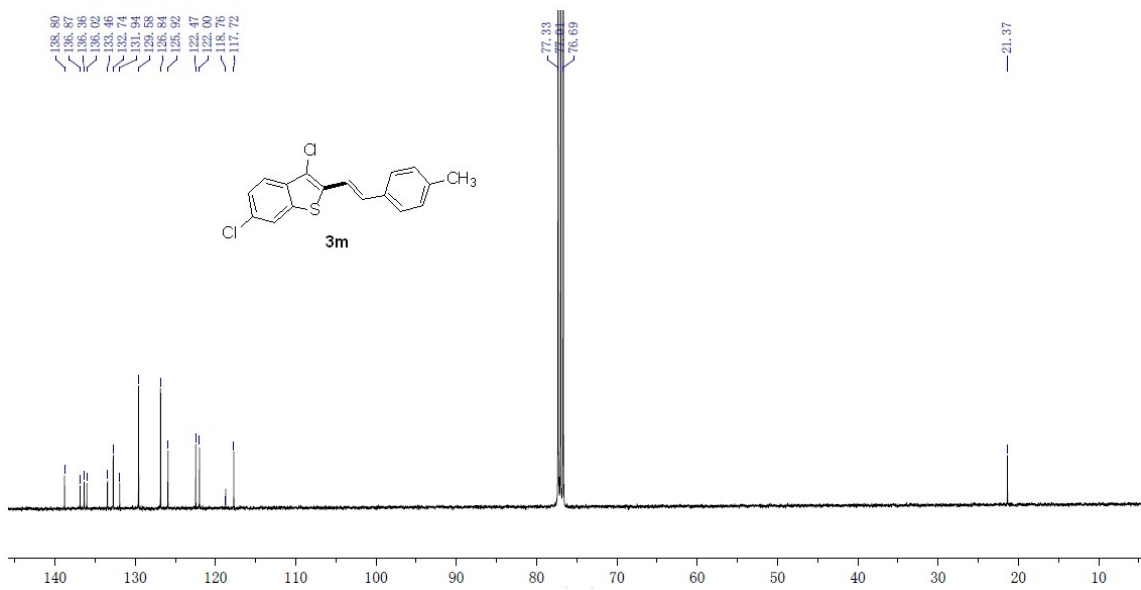

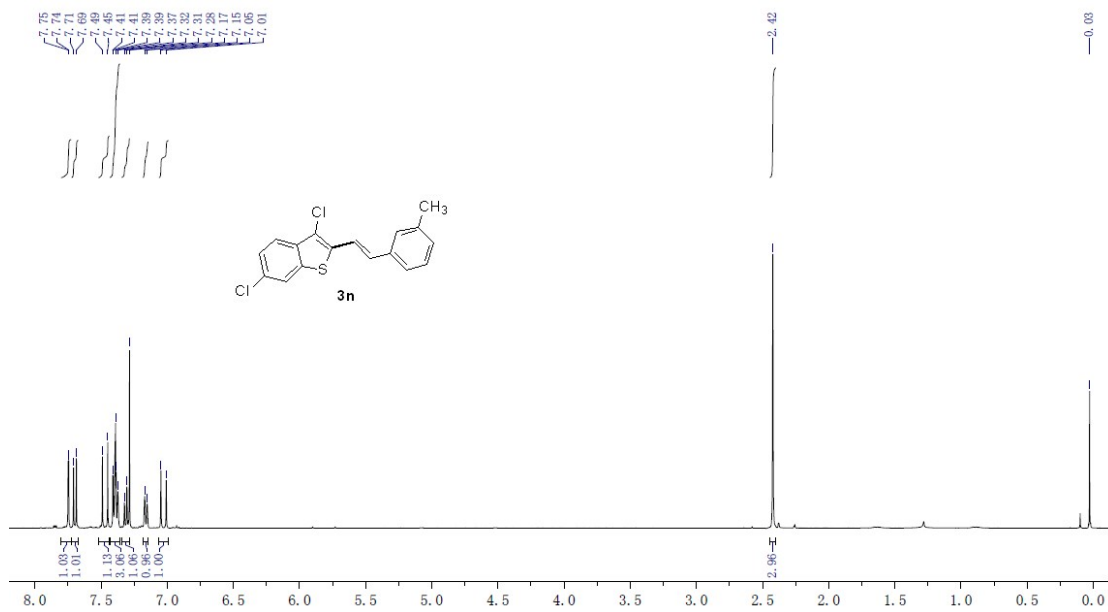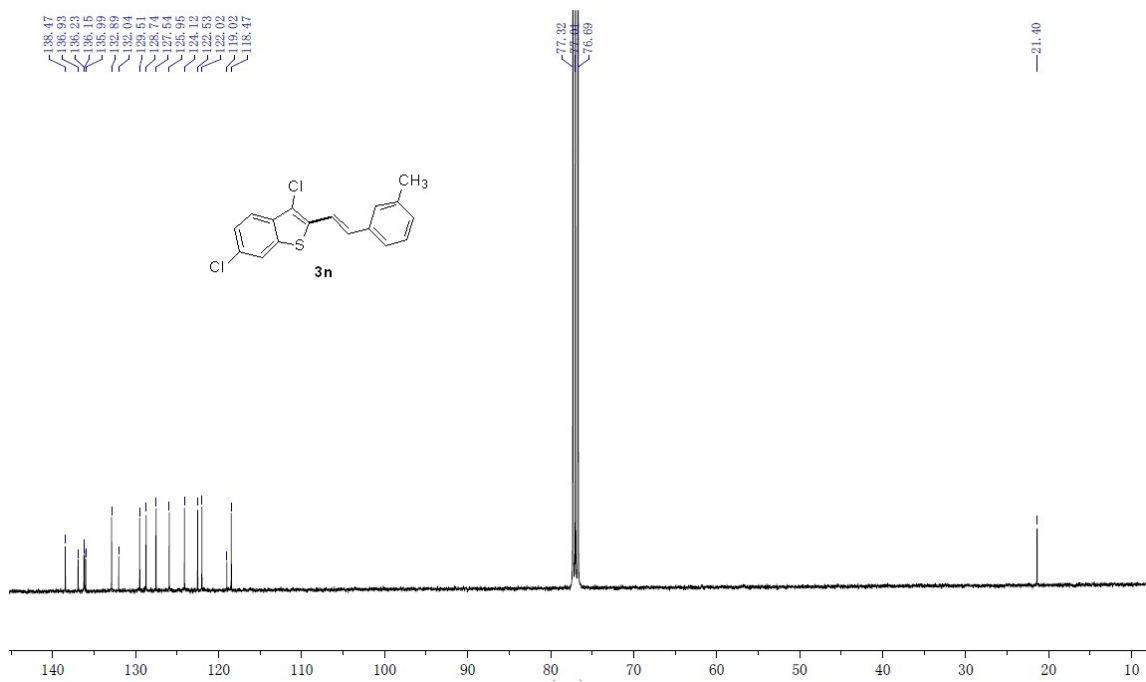



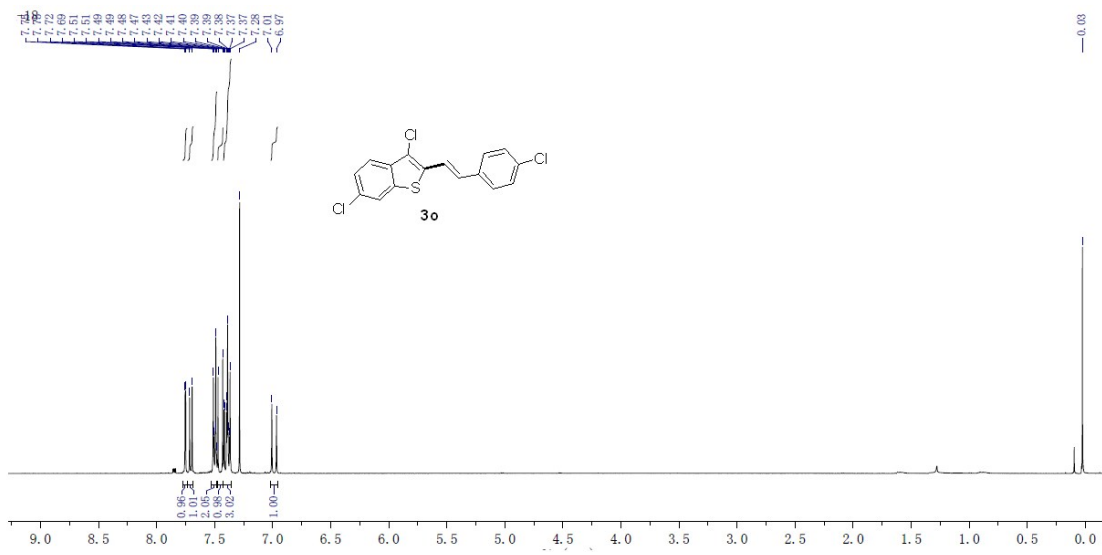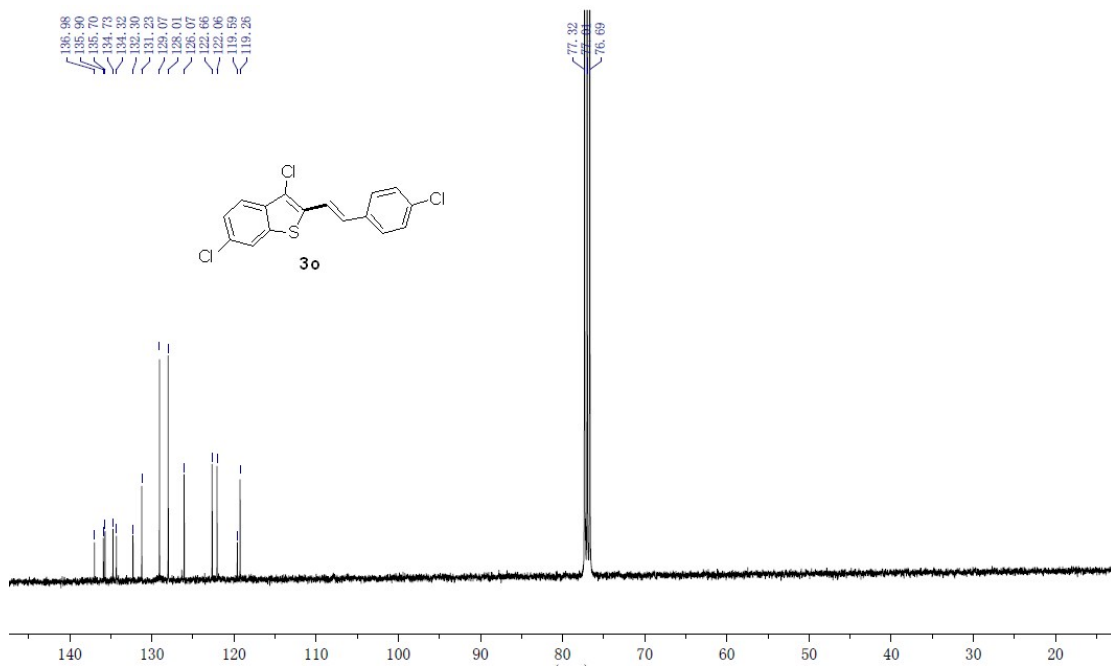

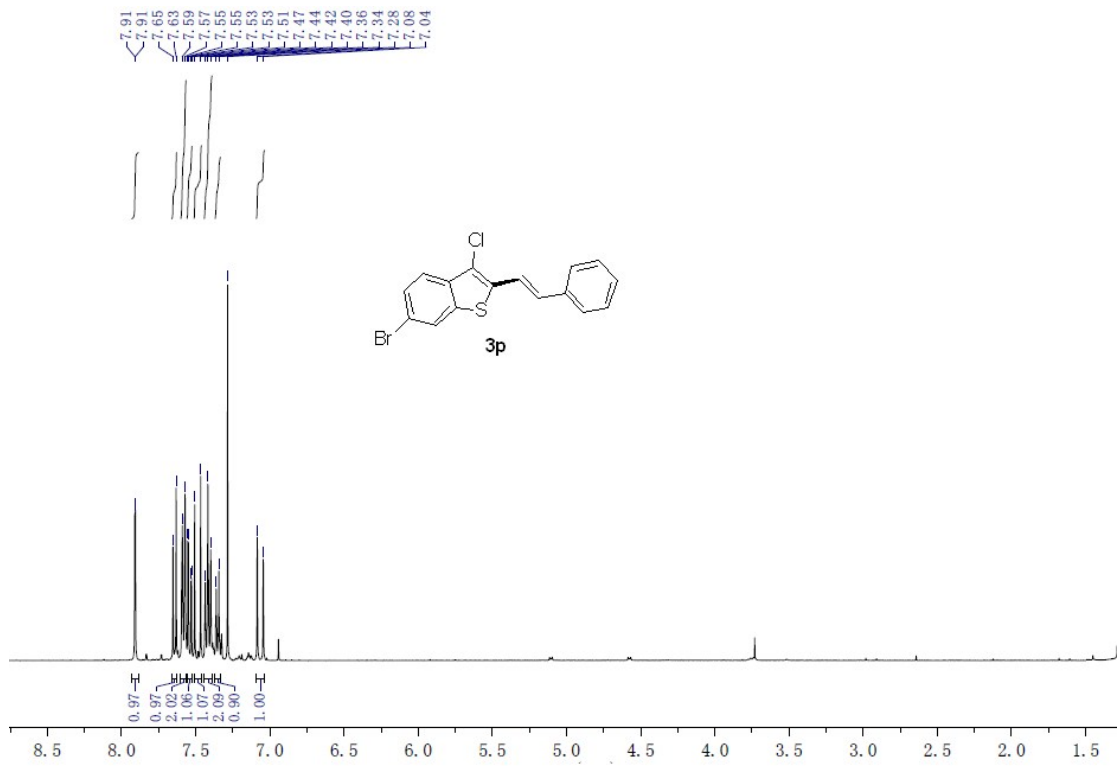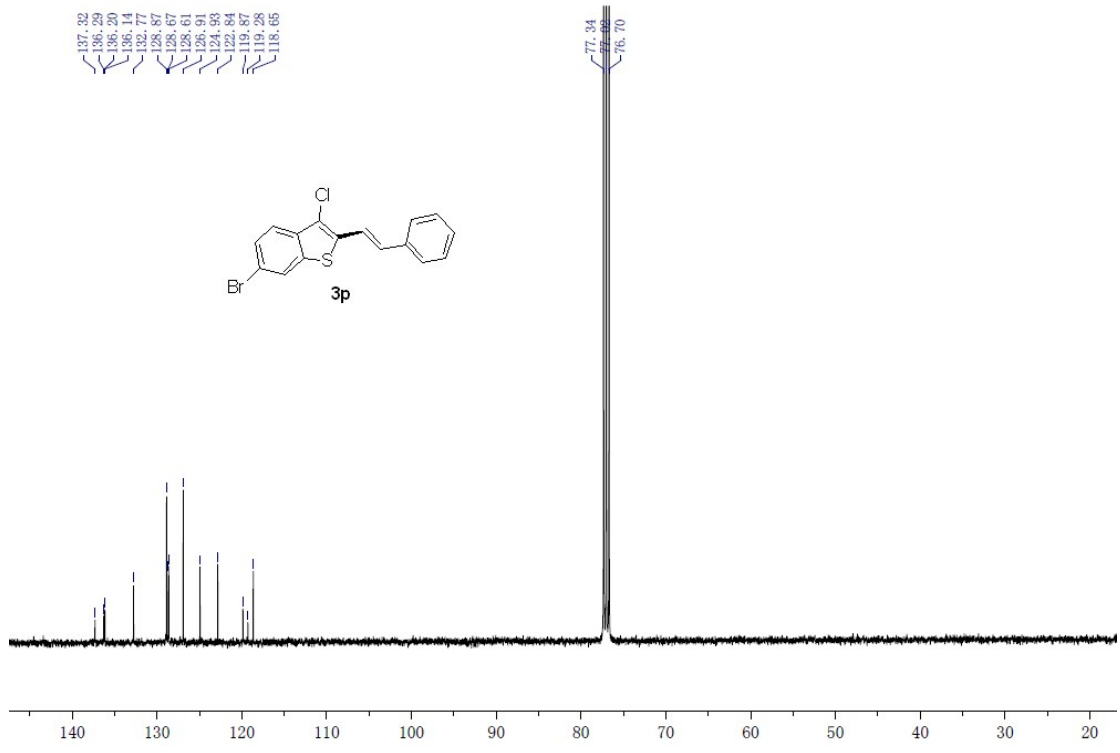

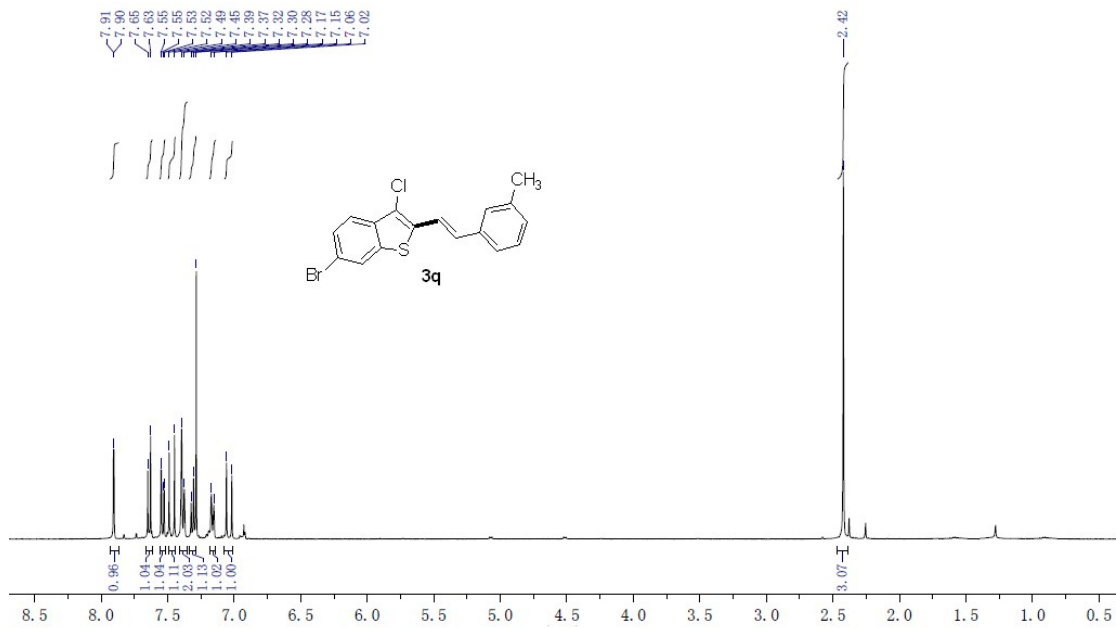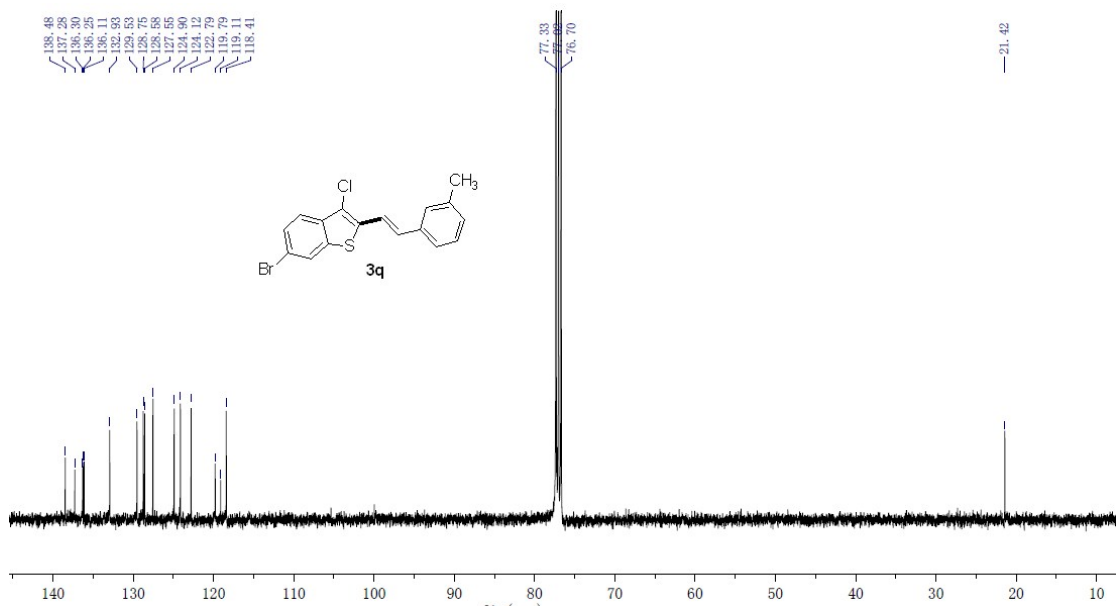

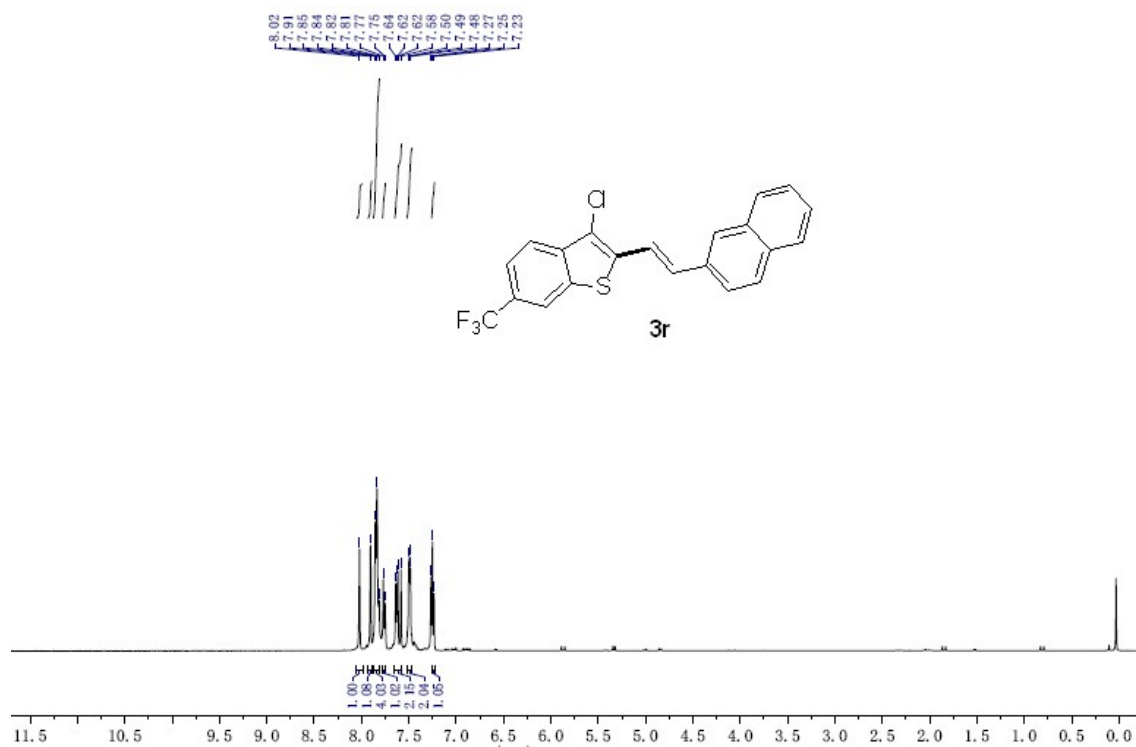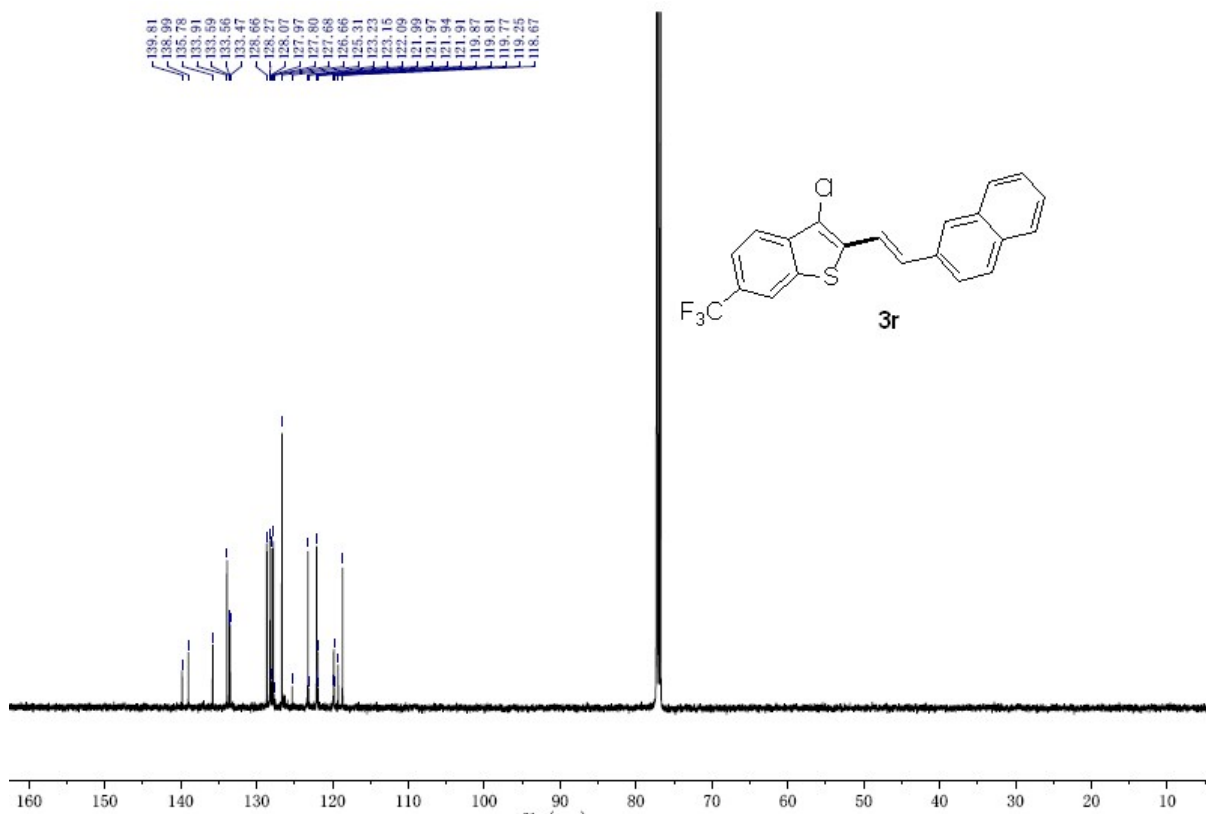

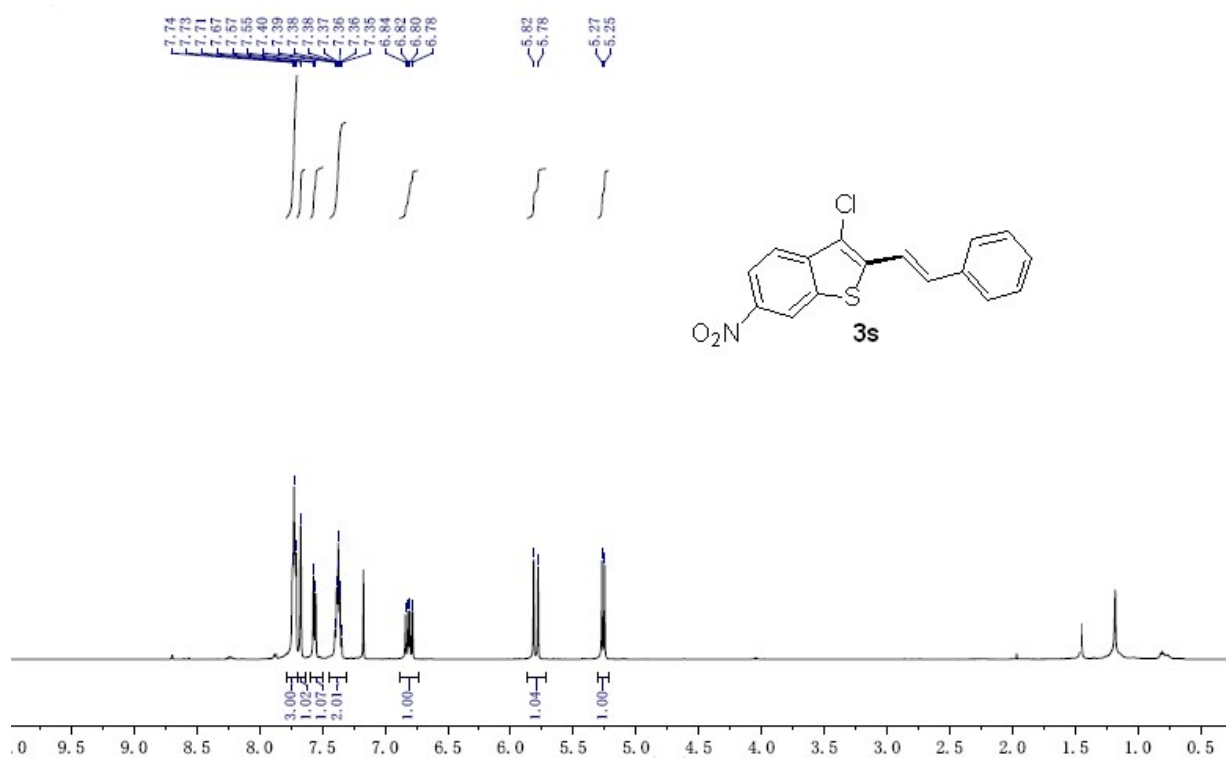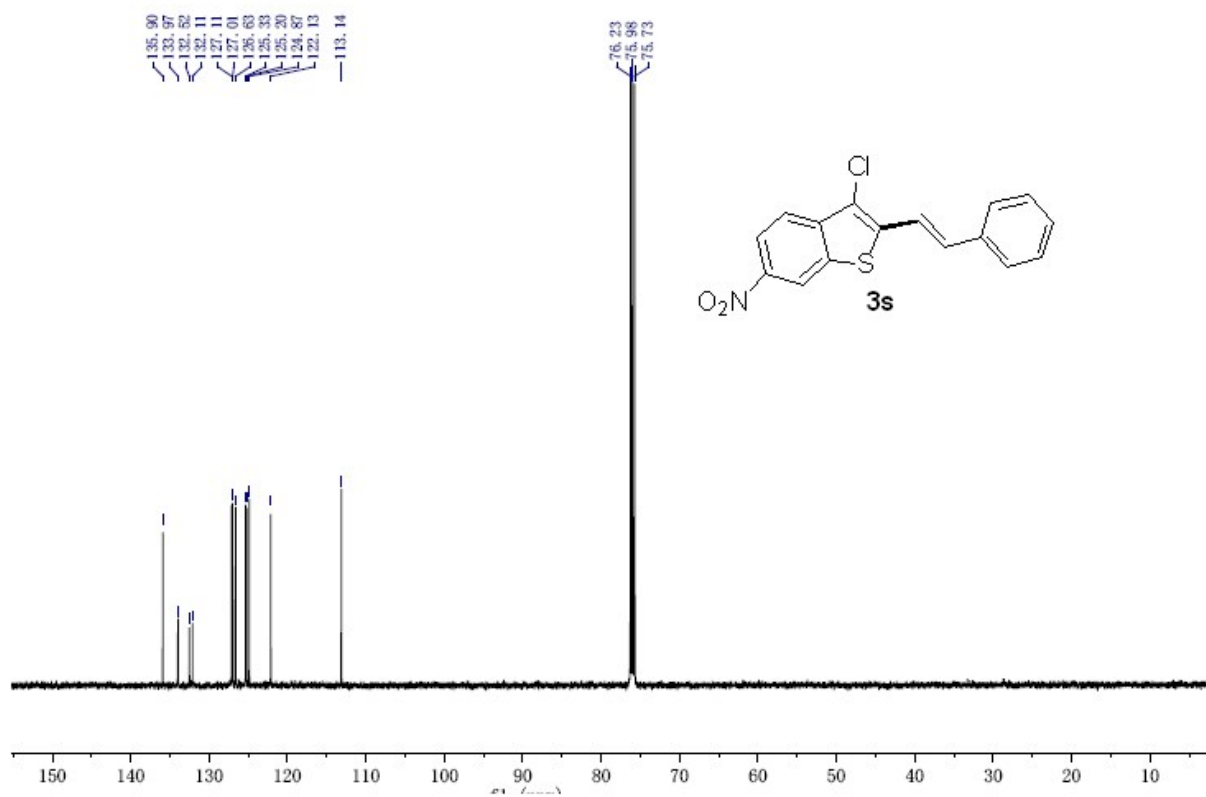

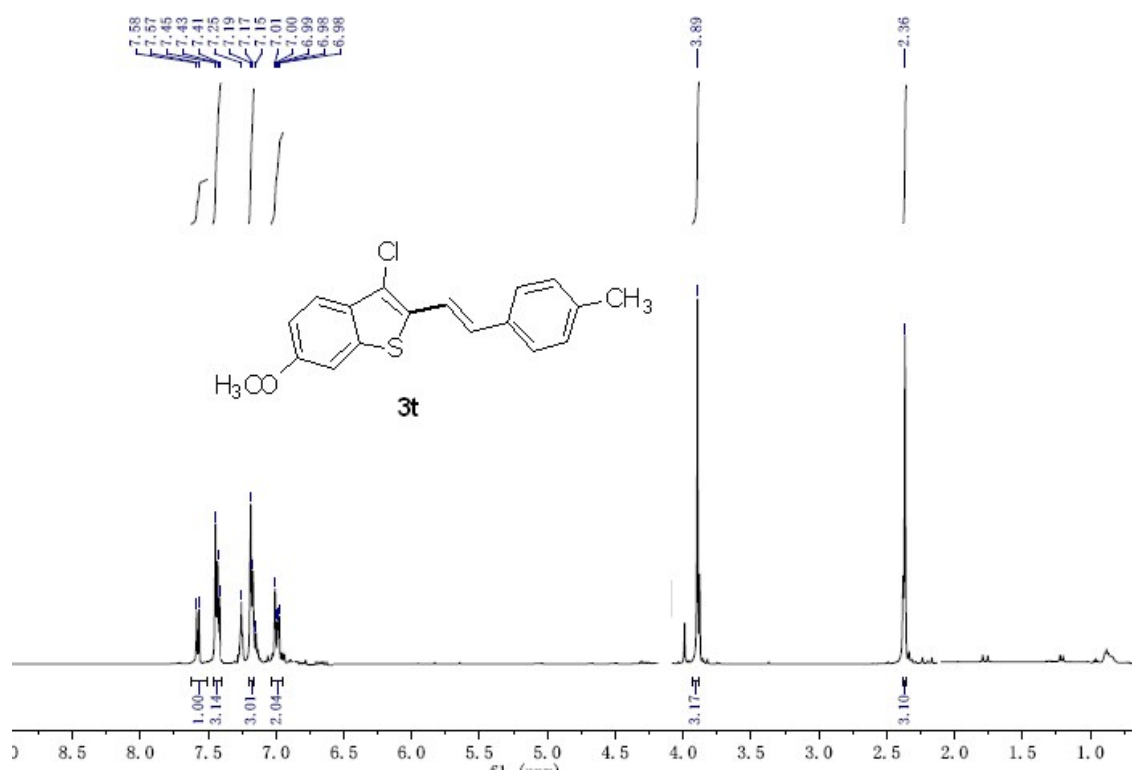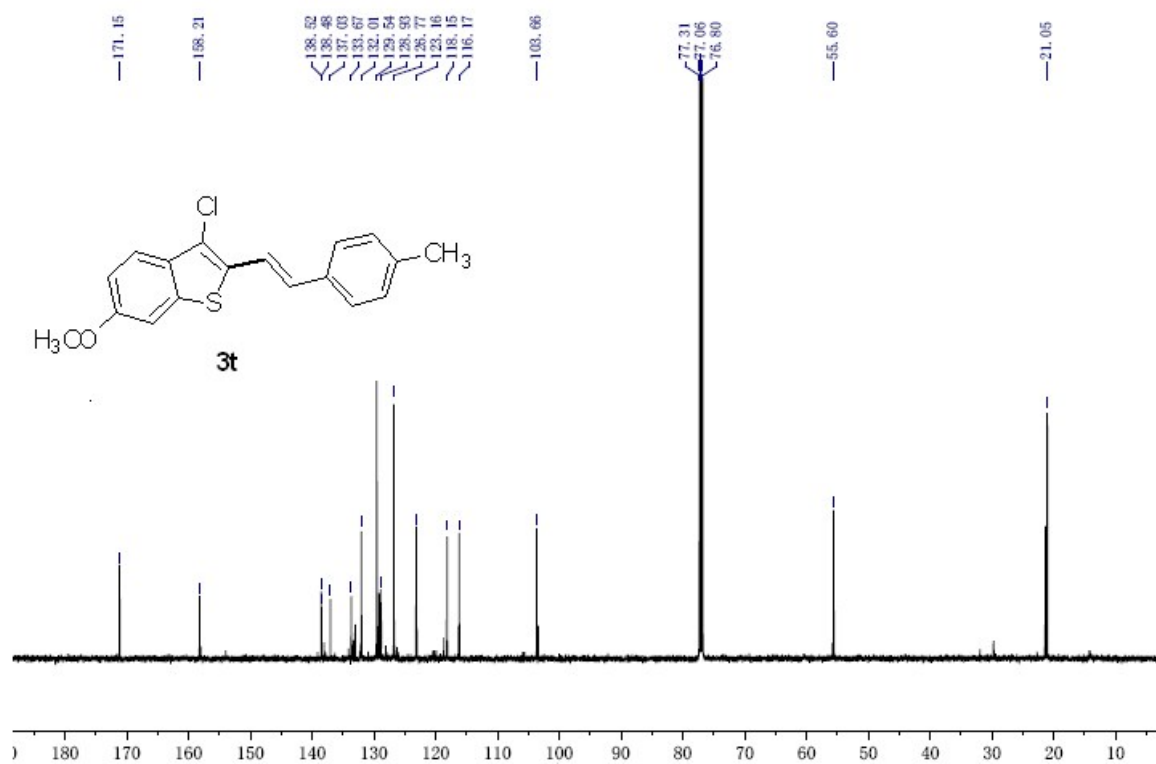

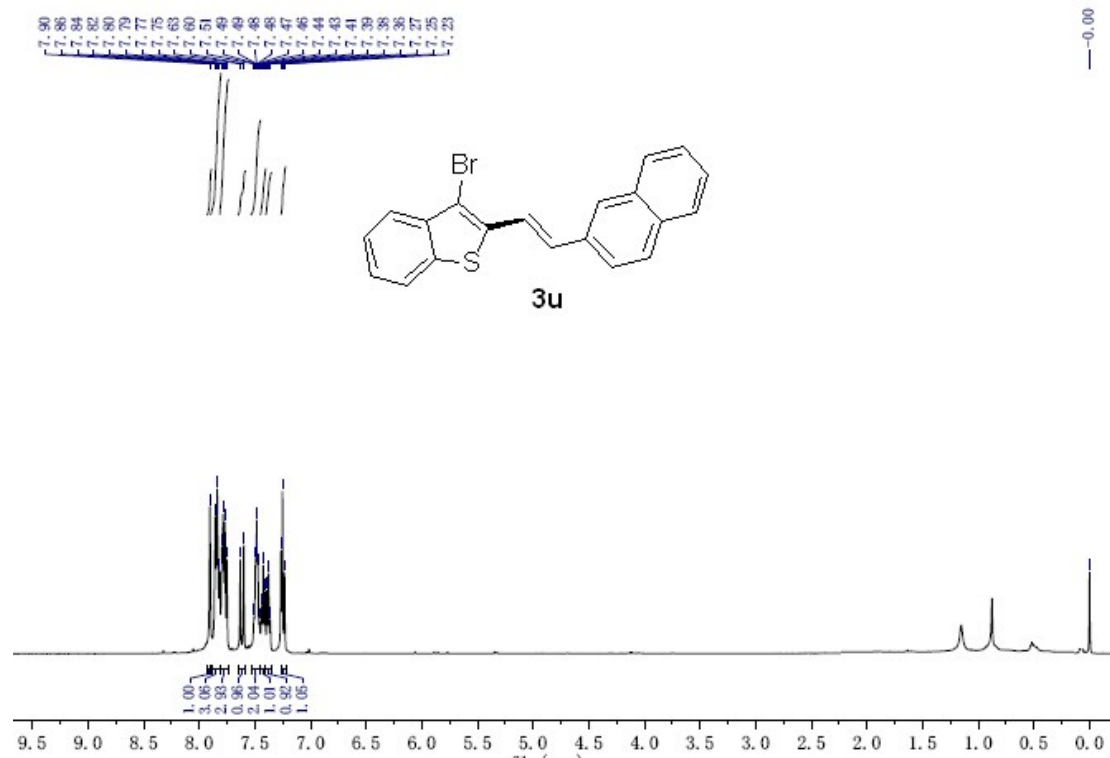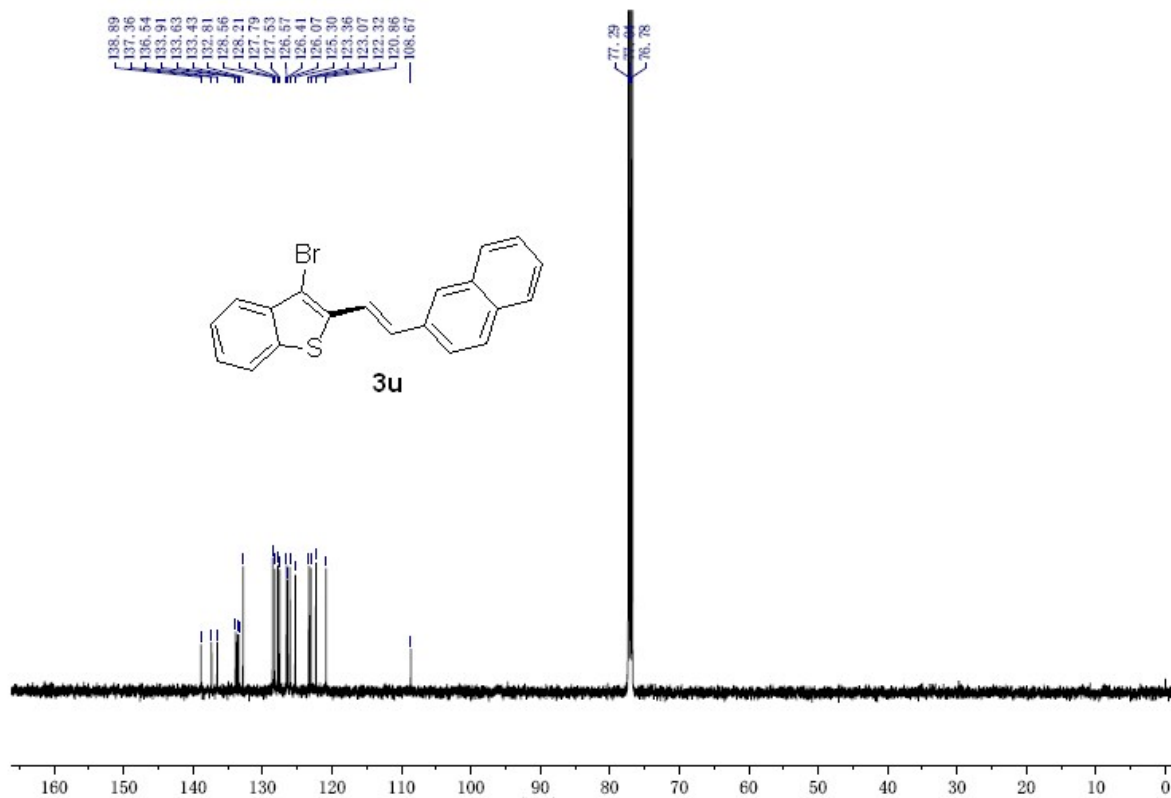

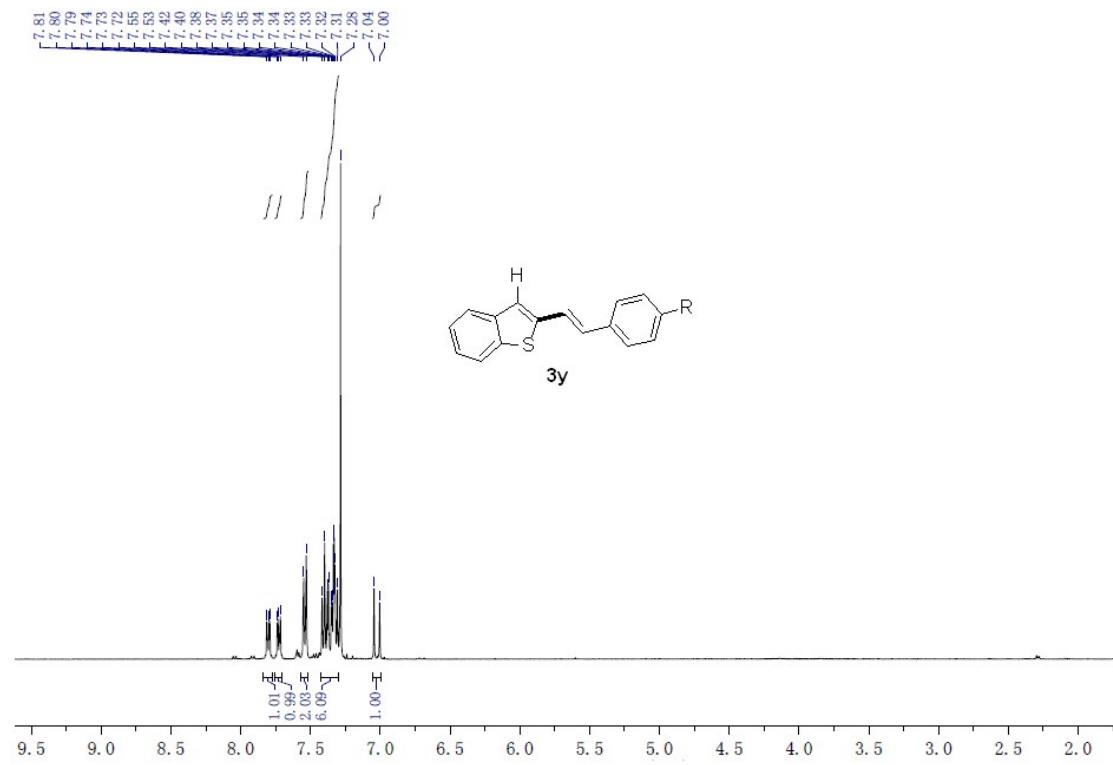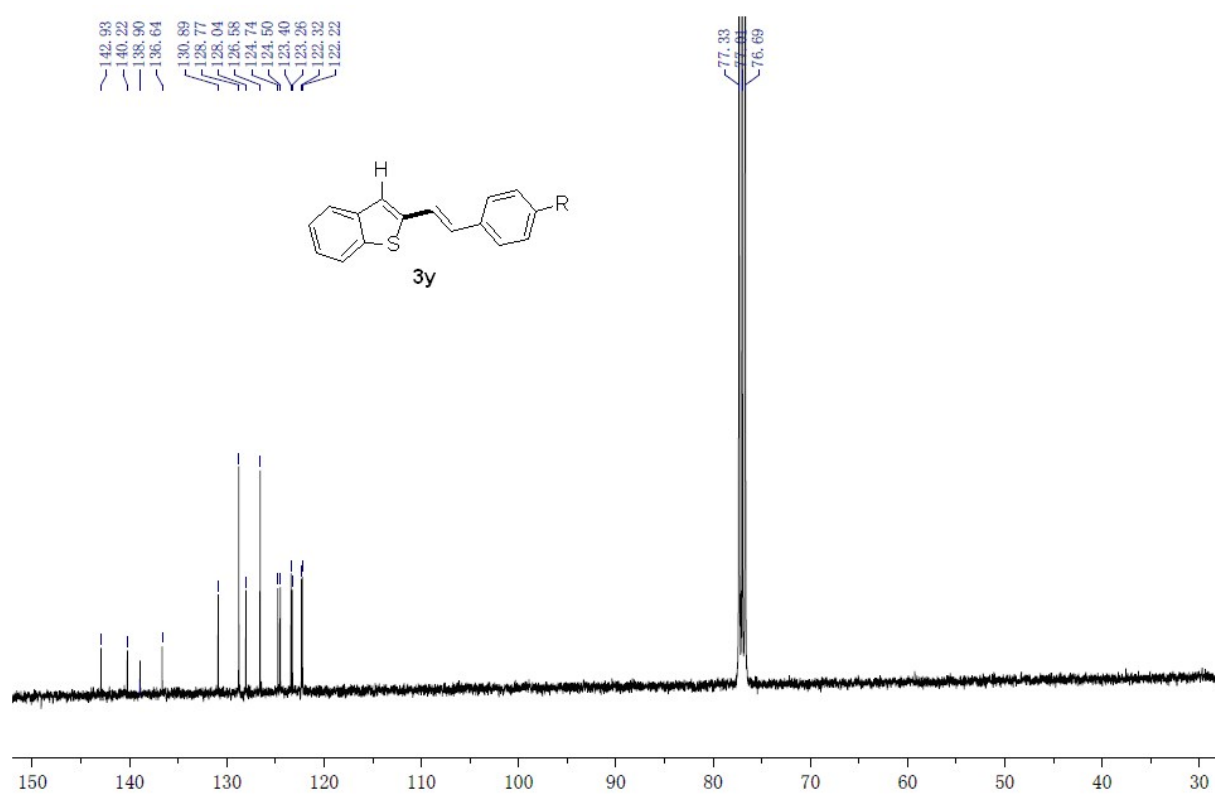



## Computational Section

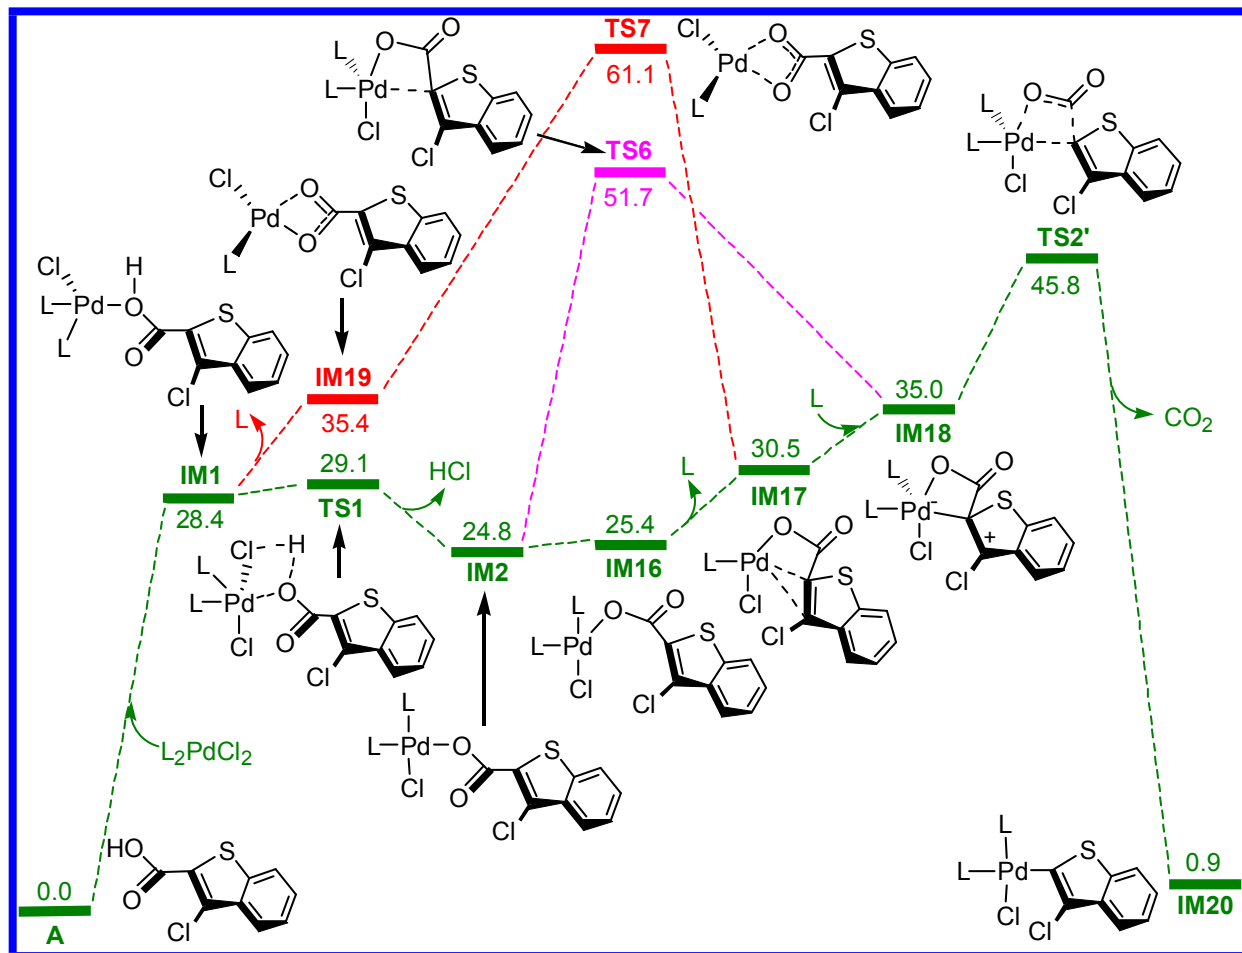

**Figure S1.** Calculated free energy profiles in DMF solution along various possible pathways for the metalation-deprotonation followed by the decarboxylation in the Cl-substituted system as well as schematic structures of intermediates and transition states involved (L =DMSO). The relative free energies are given in kcal/mol.

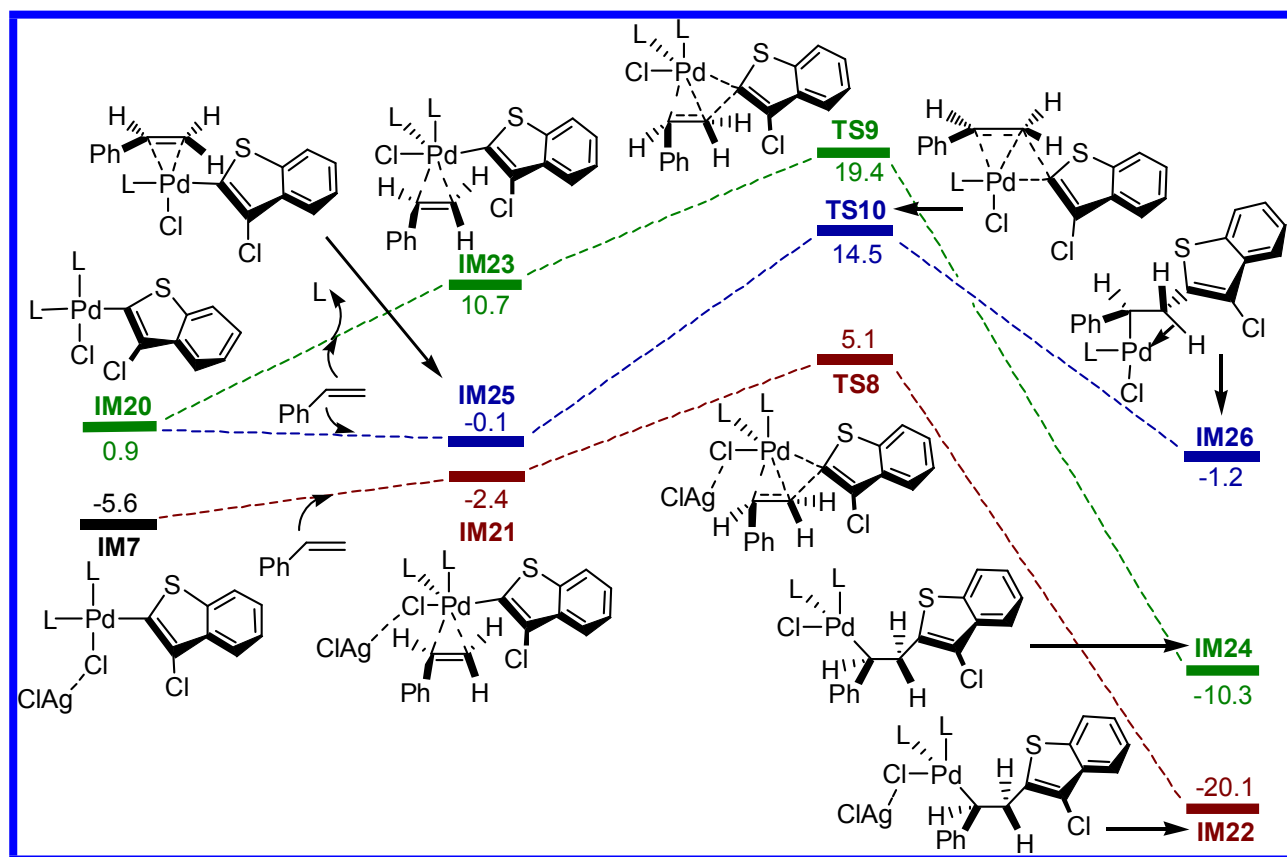

**Figure S2.** Calculated free energy profiles in DMF solution along various possible pathways for the olefin insertion in the Cl-substituted system as well as schematic structures of intermediates and transition states involved (L =DMSO). The relative free energies are given in kcal/mol.

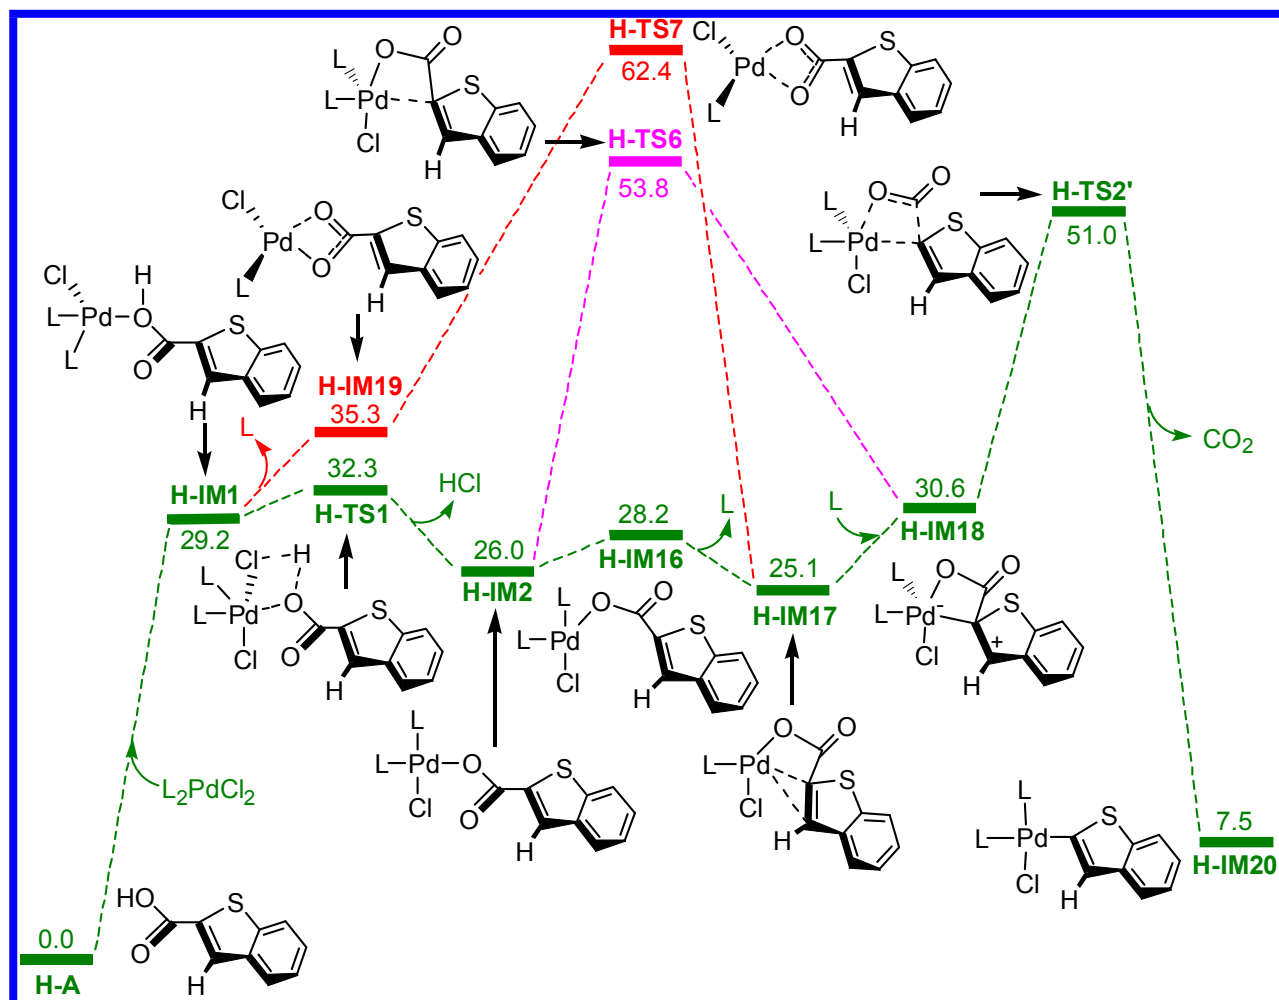

**Figure S3.** Calculated free energy profiles in DMF solution along various possible pathways for the metalation-deprotonation followed by the decarboxylation in the H-substituted system as well as schematic structures of intermediates and transition states involved (L =DMSO). The relative free energies are given in kcal/mol.

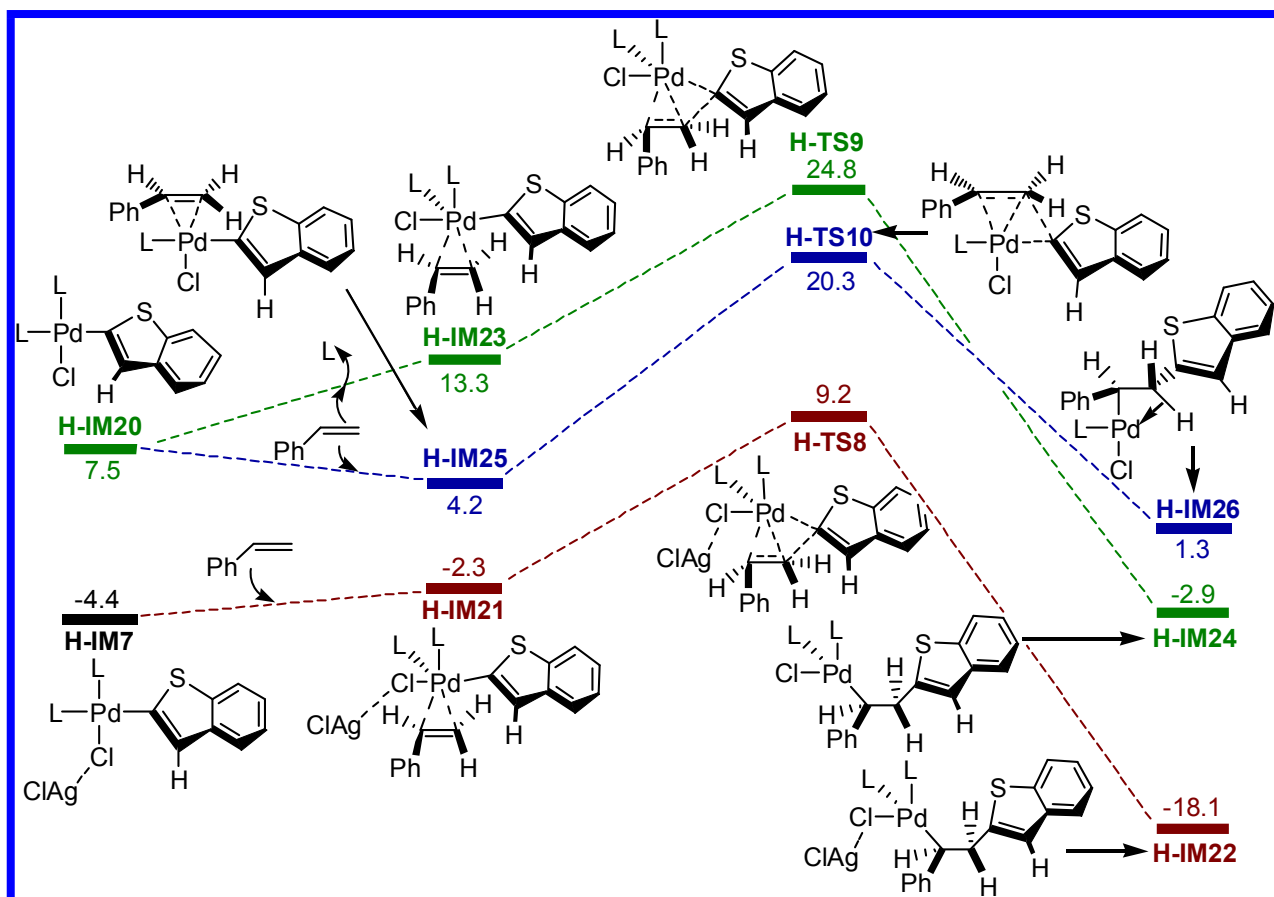

**Figure S4.** Calculated free energy profiles in DMF solution along various possible pathways for the olefin insertion in the H-substituted system as well as schematic structures of intermediates and transition states involved (L =DMSO). The relative free energies are given in kcal/mol.

## Cartesian Coordinates for the Stationary Points Given in Figure 1.

### A

|    |             |             |             |
|----|-------------|-------------|-------------|
| C  | -1.29021400 | -0.94208200 | 0.00020200  |
| C  | -1.06790100 | 0.44568400  | 0.00015400  |
| C  | -2.16400100 | 1.31888400  | 0.00024700  |
| C  | -3.44112800 | 0.79352200  | 0.00038700  |
| C  | -3.64640500 | -0.59477400 | 0.00044200  |
| C  | -2.57625500 | -1.47446100 | 0.00035100  |
| C  | 0.33084200  | 0.75330400  | -0.00000400 |
| H  | -1.99374900 | 2.39253800  | 0.00020100  |
| H  | -4.29855800 | 1.46127100  | 0.00045100  |
| H  | -4.66007100 | -0.98791400 | 0.00055400  |
| H  | -2.73240300 | -2.55029400 | 0.00039300  |
| Cl | 0.86637300  | 2.42878100  | -0.00005700 |
| S  | 0.23599800  | -1.86456600 | 0.00005900  |
| C  | 1.16095700  | -0.32466800 | -0.00008600 |
| C  | 2.62655200  | -0.35091900 | -0.00030600 |
| O  | 3.09390500  | -1.61487500 | -0.00038400 |
| H  | 4.05984800  | -1.54126100 | -0.00070200 |
| O  | 3.34683700  | 0.61768700  | -0.00076500 |

### IM1

|    |             |             |             |
|----|-------------|-------------|-------------|
| C  | -4.21386400 | -1.17703800 | 0.41624600  |
| C  | -4.60812600 | 0.07416600  | -0.08810700 |
| C  | -5.96266000 | 0.30926700  | -0.37135300 |
| C  | -6.87765800 | -0.69951300 | -0.14870100 |
| C  | -6.46649100 | -1.94545500 | 0.35366900  |
| C  | -5.13619800 | -2.19689200 | 0.63976100  |
| C  | -3.48696100 | 0.94654300  | -0.23743500 |
| H  | -6.27103000 | 1.27590400  | -0.76256600 |
| H  | -7.92910700 | -0.53043300 | -0.36580000 |
| H  | -7.20522500 | -2.72581500 | 0.51939300  |
| H  | -4.81399700 | -3.15985500 | 1.02726600  |
| Cl | -3.73164000 | 2.58046100  | -0.84154000 |
| S  | -2.46444400 | -1.27703600 | 0.70739800  |
| C  | -2.28155100 | 0.41724700  | 0.12922100  |
| C  | -0.97773800 | 1.07225600  | 0.06614600  |
| O  | 0.05792700  | 0.45525100  | 0.68847200  |
| Pd | 1.85404000  | 0.03968500  | -0.37202400 |
| O  | 3.01038400  | 1.06348800  | 1.03218900  |
| O  | 3.57474400  | -0.49917100 | -1.25660600 |
| S  | 2.98855600  | 2.70103000  | 0.96723800  |

|    |              |              |              |
|----|--------------|--------------|--------------|
| S  | 4. 20080900  | -1. 92499800 | -0. 69279700 |
| C  | 1. 39622000  | 3. 19316500  | 1. 79758100  |
| H  | 1. 44877600  | 4. 27095700  | 1. 96870400  |
| H  | 0. 56080000  | 2. 91456200  | 1. 14956600  |
| H  | 1. 38136000  | 2. 64102700  | 2. 73893400  |
| C  | 2. 55310500  | 3. 12984700  | -0. 79248800 |
| H  | 1. 52586900  | 2. 80219000  | -0. 99182800 |
| H  | 2. 66317300  | 4. 21354000  | -0. 88874000 |
| H  | 3. 27803000  | 2. 60149700  | -1. 41613000 |
| C  | 4. 28438300  | -1. 75304500 | 1. 15942000  |
| H  | 4. 82733700  | -0. 82614500 | 1. 34879300  |
| H  | 3. 26121600  | -1. 72203100 | 1. 56365400  |
| H  | 4. 84050900  | -2. 62613100 | 1. 51133500  |
| C  | 2. 83826800  | -3. 18821500 | -0. 82382200 |
| H  | 2. 43462700  | -3. 08457400 | -1. 83290700 |
| H  | 3. 32114700  | -4. 15695400 | -0. 66940200 |
| H  | 2. 07509800  | -2. 96678200 | -0. 06326800 |
| Cl | 0. 80634700  | -1. 99317300 | 1. 90665800  |
| O  | -0. 76789600 | 2. 14158300  | -0. 46433000 |
| Cl | 0. 59282900  | -0. 97913300 | -2. 07832400 |
| H  | 0. 00308200  | -0. 45227300 | 1. 19255100  |

## TS1

|    |              |              |              |
|----|--------------|--------------|--------------|
| C  | 4. 40694200  | -1. 32215600 | -0. 05881600 |
| C  | 4. 69585100  | 0. 05319300  | -0. 01302500 |
| C  | 6. 02200000  | 0. 48494000  | -0. 15500300 |
| C  | 7. 01777400  | -0. 45538100 | -0. 33052100 |
| C  | 6. 71383800  | -1. 82542400 | -0. 36977200 |
| C  | 5. 40998400  | -2. 27180300 | -0. 23459000 |
| C  | 3. 50836000  | 0. 82399000  | 0. 19009000  |
| H  | 6. 24672300  | 1. 54828400  | -0. 12214800 |
| H  | 8. 05001300  | -0. 13282500 | -0. 43904000 |
| H  | 7. 51311800  | -2. 54901200 | -0. 50983500 |
| H  | 5. 17098800  | -3. 33160900 | -0. 26729800 |
| Cl | 3. 58942200  | 2. 58794400  | 0. 23814400  |
| S  | 2. 66600400  | -1. 65234200 | 0. 12632900  |
| C  | 2. 35799400  | 0. 10663200  | 0. 28975100  |
| C  | 0. 99209600  | 0. 60289300  | 0. 51512000  |
| O  | 0. 03717700  | -0. 17294900 | 0. 03946300  |
| Pd | -1. 97702400 | -0. 00584600 | 0. 45194300  |
| O  | -2. 28991500 | 1. 27727800  | -1. 17255500 |
| O  | -3. 98592800 | -0. 08347100 | 0. 66519800  |
| S  | -2. 26150600 | 2. 89765800  | -0. 90042800 |

|    |             |             |             |
|----|-------------|-------------|-------------|
| S  | -4.68996800 | -1.27158000 | -0.24251100 |
| C  | -0.50406900 | 3.36604400  | -1.28494800 |
| H  | -0.44145800 | 4.45602700  | -1.23920100 |
| H  | 0.15072300  | 2.88512000  | -0.55223000 |
| H  | -0.32460000 | 3.00393400  | -2.29840100 |
| C  | -2.22648100 | 3.11126000  | 0.94736700  |
| H  | -1.35372100 | 2.56895000  | 1.33138300  |
| H  | -2.15954000 | 4.18698800  | 1.13466400  |
| H  | -3.16749400 | 2.70395400  | 1.32324500  |
| C  | -4.08623500 | -1.03089500 | -1.98891900 |
| H  | -4.29279500 | 0.00954600  | -2.24085400 |
| H  | -3.01045900 | -1.24619400 | -2.03372300 |
| H  | -4.67094400 | -1.72258800 | -2.60126800 |
| C  | -3.78591000 | -2.85265800 | 0.15244500  |
| H  | -3.72161600 | -2.89887800 | 1.24124700  |
| H  | -4.40174100 | -3.65559000 | -0.26145400 |
| H  | -2.78578300 | -2.81641500 | -0.29701600 |
| Cl | -0.55283300 | -2.11205900 | -1.78560400 |
| O  | 0.75401800  | 1.65223000  | 1.08748300  |
| Cl | -1.65777000 | -1.38221500 | 2.32290100  |
| H  | 0.01358900  | -1.04152000 | -0.78594600 |

## IM2

|    |             |             |             |
|----|-------------|-------------|-------------|
| C  | 4.46188400  | -1.39553700 | -0.41286700 |
| C  | 4.67374100  | -0.10727900 | 0.10842900  |
| C  | 5.98238200  | 0.37668300  | 0.23470400  |
| C  | 7.03809800  | -0.42715300 | -0.15198300 |
| C  | 6.81112700  | -1.71265000 | -0.66639100 |
| C  | 5.52407600  | -2.20702200 | -0.80121000 |
| C  | 3.43111300  | 0.52614500  | 0.44234000  |
| H  | 6.14755600  | 1.37372600  | 0.63604200  |
| H  | 8.05696300  | -0.06018900 | -0.05598300 |
| H  | 7.65609300  | -2.32946300 | -0.96320200 |
| H  | 5.34340900  | -3.20193900 | -1.20098500 |
| Cl | 3.44277700  | 2.17242100  | 1.09567300  |
| S  | 2.73005300  | -1.80226900 | -0.50420800 |
| C  | 2.31355400  | -0.20647200 | 0.20169300  |
| C  | 0.88094300  | 0.12833000  | 0.41336700  |
| O  | 0.09028800  | -0.70920400 | -0.16291000 |
| Pd | -1.86034400 | -0.25992500 | -0.01972200 |
| O  | -1.58133900 | 1.25442700  | -1.40632800 |
| O  | -3.84652700 | 0.35016600  | 0.05964200  |
| S  | -1.76645000 | 2.82657500  | -0.94616900 |

|    |             |             |             |
|----|-------------|-------------|-------------|
| S  | -5.07132700 | -0.61918900 | -0.44466200 |
| C  | -0.00478700 | 3.42564000  | -0.89736800 |
| H  | -0.02771500 | 4.48348500  | -0.62308900 |
| H  | 0.53488200  | 2.80777500  | -0.16993100 |
| H  | 0.37676800  | 3.29337800  | -1.91080000 |
| C  | -2.10047200 | 2.79326700  | 0.88249800  |
| H  | -1.29671900 | 2.19769500  | 1.33171600  |
| H  | -2.10153100 | 3.83391500  | 1.21916000  |
| H  | -3.08022100 | 2.32668200  | 1.00120000  |
| C  | -4.26609800 | -1.96975800 | -1.43388200 |
| H  | -3.75864400 | -1.46956300 | -2.26157800 |
| H  | -3.55333300 | -2.48697600 | -0.78153600 |
| H  | -5.06723400 | -2.62081100 | -1.79444600 |
| C  | -5.53785000 | -1.58436000 | 1.07544500  |
| H  | -5.99204700 | -0.86467200 | 1.75762100  |
| H  | -6.26252700 | -2.34242200 | 0.76672600  |
| H  | -4.61425600 | -2.00698100 | 1.48742500  |
| Cl | -2.15530900 | -2.13947500 | 1.39497500  |
| O  | 0.56316600  | 1.12235600  | 1.06957100  |

### IM3

|    |             |             |             |
|----|-------------|-------------|-------------|
| C  | -1.02376300 | 2.29752000  | -1.13320300 |
| C  | -1.61759200 | 2.52130500  | 0.11880600  |
| C  | -2.24325500 | 3.74752400  | 0.37038300  |
| C  | -2.26490300 | 4.70689500  | -0.62516200 |
| C  | -1.66990100 | 4.46409700  | -1.87075800 |
| C  | -1.04235800 | 3.25679200  | -2.13821300 |
| C  | -1.49007200 | 1.37426400  | 0.96972400  |
| H  | -2.70682000 | 3.92336000  | 1.33818500  |
| H  | -2.75453000 | 5.65989100  | -0.44275800 |
| H  | -1.70563100 | 5.22961700  | -2.64185900 |
| H  | -0.58785500 | 3.06128500  | -3.10619300 |
| Cl | -2.13697500 | 1.37704300  | 2.61092900  |
| S  | -0.25906100 | 0.68116700  | -1.22943200 |
| C  | -0.83167700 | 0.31889800  | 0.43962000  |
| C  | -0.65958700 | -1.05102500 | 0.99816200  |
| O  | -1.67913100 | -1.69627100 | 1.32281700  |
| Pd | 2.18791300  | -0.69618600 | 0.36031300  |
| O  | 3.92990100  | 0.03358200  | -0.38448600 |
| S  | 3.99877900  | 1.68329900  | -0.43172500 |
| C  | 5.23563100  | 2.03950800  | 0.90621700  |
| H  | 5.58200000  | 3.06904900  | 0.78772300  |
| H  | 4.68836000  | 1.89466800  | 1.83950900  |



|    |             |             |             |
|----|-------------|-------------|-------------|
| H  | 6.04009300  | 1.30862500  | 0.79214700  |
| C  | 5.12862500  | 1.82048000  | -1.89628900 |
| H  | 4.53761000  | 1.53385900  | -2.76648000 |
| H  | 5.47524200  | 2.85343700  | -1.97366300 |
| H  | 5.94817800  | 1.11639000  | -1.73545800 |
| Cl | 2.18581100  | 0.91875500  | 2.08729000  |
| O  | 0.49938500  | -1.57789400 | 1.05952200  |
| O  | 2.29787800  | -1.99556800 | -1.25868400 |
| S  | 1.61086300  | -3.48128600 | -1.33851400 |
| C  | -0.24525100 | -3.24723400 | -1.37351400 |
| H  | -0.64748600 | -4.07432100 | -1.96204200 |
| H  | -0.64565300 | -3.22992100 | -0.35827000 |
| H  | -0.40988500 | -2.29597900 | -1.88909900 |
| C  | 1.82902000  | -4.23666000 | 0.34493900  |
| H  | 2.90602600  | -4.33529300 | 0.48898300  |
| H  | 1.37187600  | -3.56831100 | 1.07896500  |
| H  | 1.34658800  | -5.21699500 | 0.31504200  |
| Ag | -3.47320400 | -1.12193800 | 0.18609700  |
| Cl | -5.13498800 | -0.55989100 | -1.38460600 |

#### IM4

|    |             |             |             |
|----|-------------|-------------|-------------|
| C  | 2.98594000  | 2.21030600  | -0.71750900 |
| C  | 2.35158400  | 2.54243900  | 0.49189000  |
| C  | 3.09815700  | 3.13940400  | 1.51499400  |
| C  | 4.44358800  | 3.38943700  | 1.30827200  |
| C  | 5.05930200  | 3.05728300  | 0.09331200  |
| C  | 4.33613800  | 2.46666600  | -0.93261900 |
| C  | 0.96812500  | 2.16420900  | 0.46684300  |
| H  | 2.61143800  | 3.39962200  | 2.45219600  |
| H  | 5.02984400  | 3.85519500  | 2.09625200  |
| H  | 6.11597300  | 3.26910500  | -0.05024000 |
| H  | 4.80775700  | 2.21143400  | -1.87860600 |
| Cl | -0.08522400 | 2.45838700  | 1.86056300  |
| S  | 1.86987800  | 1.40248300  | -1.86262500 |
| C  | 0.54870700  | 1.54486300  | -0.65838600 |
| C  | -0.82270200 | 1.02313800  | -0.92999400 |
| O  | -1.00932100 | -0.23509700 | -0.96882100 |
| Pd | 0.40649200  | -1.56212800 | -0.33151000 |
| O  | 0.16921200  | -0.92744800 | 1.63589100  |
| O  | 1.63292400  | -3.01107300 | 0.42708400  |
| S  | -1.11375800 | -1.47401400 | 2.50946100  |
| S  | 3.21961100  | -2.63915900 | 0.64666300  |
| C  | -1.41283000 | -3.18840800 | 1.86145400  |

|    |             |             |             |
|----|-------------|-------------|-------------|
| H  | -2.26540100 | -3.60010800 | 2.40739100  |
| H  | -1.61311100 | -3.11668300 | 0.78740800  |
| H  | -0.49784700 | -3.75330200 | 2.04766500  |
| C  | -2.58662700 | -0.61653400 | 1.76586200  |
| H  | -2.61559500 | -0.84964100 | 0.69803400  |
| H  | -3.48554500 | -0.96848200 | 2.27811400  |
| H  | -2.42777400 | 0.45163400  | 1.93648500  |
| C  | 3.94939800  | -2.59304600 | -1.06324200 |
| H  | 3.98492000  | -3.62645500 | -1.41015900 |
| H  | 3.28665000  | -2.00042500 | -1.70406800 |
| H  | 4.95325300  | -2.17130300 | -0.96327100 |
| C  | 3.24561000  | -0.81655000 | 1.01726700  |
| H  | 2.54489900  | -0.66323800 | 1.84225000  |
| H  | 4.27085100  | -0.54438300 | 1.28408100  |
| H  | 2.90553900  | -0.29334300 | 0.11866100  |
| Cl | 0.85006200  | -2.21812500 | -2.54226500 |
| O  | -1.73145200 | 1.86234300  | -1.06999500 |
| Ag | -3.74319300 | 1.07766200  | -0.74340400 |
| Cl | -5.67444600 | 0.08504000  | 0.21400500  |

## IM5

|    |             |             |             |
|----|-------------|-------------|-------------|
| C  | -3.47251200 | -1.14221200 | -0.89284800 |
| C  | -3.45054200 | -0.47729300 | 0.34010800  |
| C  | -4.61715400 | 0.11823400  | 0.82435700  |
| C  | -5.76951900 | 0.04624500  | 0.06281300  |
| C  | -5.77008700 | -0.61040700 | -1.17371200 |
| C  | -4.62078200 | -1.21043900 | -1.66817700 |
| C  | -2.13279400 | -0.47689900 | 0.93313900  |
| H  | -4.59848700 | 0.64430100  | 1.77543100  |
| H  | -6.68210700 | 0.51316300  | 0.42255000  |
| H  | -6.68431300 | -0.64937500 | -1.76036500 |
| H  | -4.61904500 | -1.71783600 | -2.62891000 |
| Cl | -1.99398000 | -0.23930400 | 2.69529300  |
| S  | -1.87732300 | -1.85178200 | -1.32605100 |
| C  | -1.17597800 | -1.16864700 | 0.15552100  |
| C  | 0.26550100  | -1.39092400 | 0.48801300  |
| O  | 0.75552500  | -0.35028100 | 1.05928000  |
| Pd | -0.62345800 | 0.97257600  | 0.15931300  |
| O  | 0.76831400  | 2.46194100  | -0.12326000 |
| S  | 2.25624000  | 1.73410900  | -0.32354400 |
| C  | 3.13801900  | 3.07179100  | -1.23952000 |
| H  | 2.67190300  | 3.12997300  | -2.22332000 |
| H  | 3.00525300  | 4.00181600  | -0.68262300 |

|    |             |             |             |
|----|-------------|-------------|-------------|
| H  | 4.18198500  | 2.75611600  | -1.30850200 |
| C  | 3.00408200  | 1.95742800  | 1.35699800  |
| H  | 2.44713800  | 1.28208500  | 2.00880100  |
| H  | 4.05128400  | 1.65426400  | 1.27658300  |
| H  | 2.85877200  | 3.00345900  | 1.63728500  |
| Cl | -2.19640400 | 2.25839200  | -0.98655900 |
| O  | 0.89597100  | -2.38728100 | 0.11446900  |
| Ag | 3.01655700  | -1.65370800 | -0.07987200 |
| Cl | 4.92320600  | -0.24530800 | -0.48649100 |

## IM6

|    |             |             |             |
|----|-------------|-------------|-------------|
| C  | -3.76413500 | -0.10546900 | -0.97058800 |
| C  | -3.58564600 | 0.11840000  | 0.41114800  |
| C  | -4.52864700 | 0.87952200  | 1.12912500  |
| C  | -5.61717300 | 1.39031200  | 0.46203900  |
| C  | -5.78149000 | 1.16239600  | -0.91896000 |
| C  | -4.86292200 | 0.42754400  | -1.64488800 |
| C  | -2.39578100 | -0.48284200 | 0.88038100  |
| H  | -4.37431000 | 1.05986300  | 2.18976400  |
| H  | -6.35398600 | 1.98204300  | 0.99786100  |
| H  | -6.64938400 | 1.57796900  | -1.42570000 |
| H  | -4.99186900 | 0.26037500  | -2.71105500 |
| Cl | -2.07068000 | -0.51383500 | 2.59571200  |
| S  | -2.48065800 | -1.08403200 | -1.68479700 |
| C  | -1.57103100 | -1.10208600 | -0.08178800 |
| C  | -0.71596000 | -2.36208100 | 0.20859900  |
| O  | -0.02369700 | -2.30230800 | 1.27403200  |
| Pd | -0.01217600 | 0.37450600  | -0.59156300 |
| O  | 1.58871500  | 1.54730100  | -1.16053900 |
| S  | 1.71757000  | 3.13515500  | -0.71035200 |
| C  | 2.29257500  | 3.12970600  | 1.06179600  |
| H  | 2.77617000  | 4.09708800  | 1.22540900  |
| H  | 1.39515700  | 3.01609900  | 1.67034000  |
| H  | 2.97686100  | 2.27970400  | 1.18546900  |
| C  | 3.38437400  | 3.38290500  | -1.48655200 |
| H  | 3.24497500  | 3.25101900  | -2.56010900 |
| H  | 3.73207500  | 4.39172100  | -1.25309300 |
| H  | 4.04262600  | 2.61449000  | -1.07092900 |
| Cl | -0.90899400 | 2.14142700  | 0.72200700  |
| O  | -0.78519700 | -3.27785600 | -0.60072300 |
| O  | 0.54658600  | -0.96435700 | -2.07540100 |
| S  | 1.93219300  | -1.78735500 | -2.36972500 |
| C  | 2.28142400  | -2.94252000 | -0.95276000 |

|    |            |             |             |
|----|------------|-------------|-------------|
| H  | 3.05252600 | -3.62218600 | -1.32553900 |
| H  | 2.64059000 | -2.36439900 | -0.09513600 |
| H  | 1.33861700 | -3.46201800 | -0.74256600 |
| C  | 3.34939100 | -0.60644900 | -2.13757300 |
| H  | 3.22772200 | 0.17061400  | -2.89312400 |
| H  | 3.31922600 | -0.19203400 | -1.12350900 |
| H  | 4.25265200 | -1.19815800 | -2.31102600 |
| Ag | 1.54621400 | -0.86205600 | 1.62977600  |
| Cl | 3.80506200 | 0.01055900  | 1.49607500  |

## TS2

|    |             |             |             |
|----|-------------|-------------|-------------|
| C  | -3.90963700 | 0.95587100  | 0.53425800  |
| C  | -3.70187200 | -0.40891900 | 0.23588900  |
| C  | -4.72403600 | -1.34586900 | 0.48606200  |
| C  | -5.91181600 | -0.90831500 | 1.02476100  |
| C  | -6.10342600 | 0.45569300  | 1.32138100  |
| C  | -5.11439400 | 1.39249300  | 1.08401300  |
| C  | -2.41032500 | -0.61697400 | -0.29790700 |
| H  | -4.55834200 | -2.39527400 | 0.25652100  |
| H  | -6.71013500 | -1.61746700 | 1.22493100  |
| H  | -7.05097700 | 0.77915300  | 1.74591400  |
| H  | -5.26894100 | 2.44373200  | 1.31213000  |
| Cl | -1.95606900 | -2.25552200 | -0.78348500 |
| S  | -2.51602300 | 1.95729500  | 0.11760700  |
| C  | -1.57784800 | 0.49643900  | -0.48904400 |
| C  | -1.06028500 | 0.61686400  | -2.19141300 |
| O  | -0.25636500 | -0.28391200 | -2.46265300 |
| Pd | 0.26657500  | 0.66326100  | 0.47026900  |
| O  | 2.20284600  | 0.83461800  | 1.29119000  |
| S  | 2.50083100  | 0.18589900  | 2.78093500  |
| C  | 2.98878800  | -1.57677600 | 2.44490600  |
| H  | 3.59952600  | -1.90029000 | 3.29247000  |
| H  | 2.05595100  | -2.13764400 | 2.37643800  |
| H  | 3.51834500  | -1.60541400 | 1.48421100  |
| C  | 4.20852500  | 0.87904900  | 2.98281700  |
| H  | 4.09724900  | 1.96116100  | 3.06256300  |
| H  | 4.64563000  | 0.46300000  | 3.89346800  |
| H  | 4.77802200  | 0.59942900  | 2.09269400  |
| Cl | -0.35816000 | -1.00962200 | 2.03606700  |
| O  | -1.59060900 | 1.53239300  | -2.75515500 |
| O  | 0.57433400  | 2.34627200  | -0.71795700 |
| S  | 1.87160600  | 2.62705100  | -1.67964300 |
| C  | 2.68031400  | 0.98864300  | -2.01470400 |

|    |            |             |             |
|----|------------|-------------|-------------|
| H  | 3.63275200 | 1.20849100  | -2.50505700 |
| H  | 2.82131600 | 0.46169600  | -1.06351900 |
| H  | 2.00681100 | 0.44843000  | -2.68437900 |
| C  | 3.11309300 | 3.31550300  | -0.47922600 |
| H  | 2.71184300 | 4.27459000  | -0.14910900 |
| H  | 3.17758400 | 2.60168100  | 0.34592900  |
| H  | 4.05962100 | 3.44574600  | -1.00991600 |
| Ag | 0.97098600 | -1.70716300 | -1.10373200 |
| Cl | 3.28941500 | -2.41282300 | -0.87780600 |

## IM7

|    |             |             |             |
|----|-------------|-------------|-------------|
| C  | -4.13075900 | -0.79090600 | -0.53614100 |
| C  | -3.75672900 | 0.44502700  | 0.01899500  |
| C  | -4.75129900 | 1.36616300  | 0.36520600  |
| C  | -6.07926400 | 1.03871700  | 0.14882900  |
| C  | -6.43493500 | -0.19612400 | -0.40763000 |
| C  | -5.46164700 | -1.12261300 | -0.75533300 |
| C  | -2.32814200 | 0.53364100  | 0.13523300  |
| H  | -4.47250400 | 2.32580900  | 0.79489900  |
| H  | -6.85657100 | 1.75148300  | 0.41339100  |
| H  | -7.48351000 | -0.43267000 | -0.57128200 |
| H  | -5.72961500 | -2.08325500 | -1.18847300 |
| Cl | -1.58868000 | 2.03250000  | 0.82248100  |
| S  | -2.69356400 | -1.80862800 | -0.89505600 |
| C  | -1.60048000 | -0.52241800 | -0.28342500 |
| Pd | 0.32167200  | -0.89297100 | -0.30368600 |
| O  | 2.42345200  | -1.37059600 | -0.03762700 |
| S  | 3.68183800  | -1.33483100 | -1.07383700 |
| C  | 3.00454000  | -2.02301700 | -2.65890400 |
| H  | 2.76418000  | -3.06795000 | -2.45746900 |
| H  | 2.11236400  | -1.44998100 | -2.92641700 |
| H  | 3.79070300  | -1.93878000 | -3.41353800 |
| C  | 3.94341500  | 0.43833100  | -1.57289900 |
| H  | 4.01793800  | 1.01072400  | -0.63867100 |
| H  | 4.88076600  | 0.45787700  | -2.13539900 |
| H  | 3.08920900  | 0.76775500  | -2.17035300 |
| Cl | 0.45369500  | 0.49881300  | -2.29739300 |
| O  | -0.05171200 | -2.14596000 | 1.31564200  |
| S  | 0.49644500  | -1.80680200 | 2.82666700  |
| C  | 0.88469800  | 0.00655900  | 2.86003000  |
| H  | 1.25447000  | 0.23157400  | 3.86441100  |
| H  | 1.64307600  | 0.23054200  | 2.10002600  |
| H  | -0.05327100 | 0.53351300  | 2.66530700  |

|    |             |              |              |
|----|-------------|--------------|--------------|
| C  | 2. 23837600 | -2. 46126500 | 2. 82770400  |
| H  | 2. 15376400 | -3. 54854900 | 2. 82202000  |
| H  | 2. 71450700 | -2. 08611400 | 1. 91543000  |
| H  | 2. 71661800 | -2. 10841800 | 3. 74514400  |
| Ag | 1. 09397900 | 1. 98002300  | -0. 21273200 |
| Cl | 2. 97897800 | 2. 43845800  | 1. 26023000  |

## IM8

|    |              |              |              |
|----|--------------|--------------|--------------|
| C  | -3. 99656600 | 1. 58680900  | 0. 45320200  |
| C  | -4. 00498400 | 0. 32479800  | -0. 16509800 |
| C  | -5. 23116300 | -0. 28025900 | -0. 46097900 |
| C  | -6. 40414800 | 0. 38088200  | -0. 13796700 |
| C  | -6. 37625700 | 1. 63904600  | 0. 47632200  |
| C  | -5. 16948500 | 2. 25478100  | 0. 77825600  |
| C  | -2. 66461000 | -0. 14150800 | -0. 39388700 |
| H  | -5. 24892200 | -1. 25834100 | -0. 93679100 |
| H  | -7. 36067900 | -0. 08425600 | -0. 36287900 |
| H  | -7. 30921300 | 2. 14042500  | 0. 72180000  |
| H  | -5. 14038500 | 3. 23016200  | 1. 25772900  |
| Cl | -2. 37622200 | -1. 74542900 | -1. 14617600 |
| S  | -2. 31652200 | 2. 15815800  | 0. 74824800  |
| C  | -1. 65523600 | 0. 66059300  | 0. 00110400  |
| Pd | 0. 29029500  | 0. 33151800  | -0. 05311200 |
| O  | 2. 34300000  | -0. 16664000 | -0. 41334700 |
| S  | 3. 59753900  | -0. 33865600 | 0. 61246900  |
| C  | 3. 23230800  | 0. 82833700  | 2. 01194700  |
| H  | 3. 27905100  | 1. 83431900  | 1. 58462000  |
| H  | 2. 23615100  | 0. 59775200  | 2. 40374600  |
| H  | 4. 01097400  | 0. 68638400  | 2. 76592200  |
| C  | 3. 35084000  | -1. 97559700 | 1. 46448600  |
| H  | 3. 20381500  | -2. 71572800 | 0. 66483200  |
| H  | 4. 26567300  | -2. 16596200 | 2. 03199400  |
| H  | 2. 46513700  | -1. 91243400 | 2. 10191900  |
| Cl | 0. 00260600  | -0. 87103400 | 2. 05205600  |
| Ag | 0. 20656500  | -2. 62933300 | 0. 08148800  |
| Cl | 1. 78259900  | -4. 09787200 | -0. 99840900 |
| C  | 1. 66259700  | 3. 77430100  | -0. 14180300 |
| C  | 1. 75076500  | 2. 75557800  | -1. 09989800 |
| C  | 3. 00594700  | 2. 42420400  | -1. 62684600 |
| C  | 4. 14465600  | 3. 08404800  | -1. 18622200 |
| C  | 4. 04888300  | 4. 07996000  | -0. 21426000 |
| C  | 2. 80425300  | 4. 42754100  | 0. 30585100  |
| H  | 0. 68450400  | 4. 03664400  | 0. 26198400  |

|   |             |            |             |
|---|-------------|------------|-------------|
| H | 3.08890900  | 1.64415100 | -2.37864200 |
| H | 5.11377400  | 2.82319300 | -1.60462400 |
| H | 4.94410800  | 4.59530000 | 0.12591500  |
| H | 2.72229000  | 5.21195800 | 1.05408400  |
| C | 0.51706200  | 2.06399400 | -1.48615900 |
| H | -0.39776700 | 2.63767600 | -1.32138600 |
| C | 0.39855100  | 0.86407900 | -2.16999400 |
| H | 1.26933900  | 0.29965400 | -2.50159300 |
| H | -0.56234800 | 0.58315300 | -2.59541800 |

### TS3

|    |             |             |             |
|----|-------------|-------------|-------------|
| C  | 4.23690500  | -0.98662700 | -0.18956800 |
| C  | 3.83159800  | 0.31792800  | -0.51947000 |
| C  | 4.79051600  | 1.33635000  | -0.58422200 |
| C  | 6.11373000  | 1.03218000  | -0.31728700 |
| C  | 6.49867000  | -0.27306400 | 0.01553900  |
| C  | 5.56264200  | -1.29530800 | 0.08534400  |
| C  | 2.41808100  | 0.38044900  | -0.74406800 |
| H  | 4.48523400  | 2.34954000  | -0.83535200 |
| H  | 6.86442400  | 1.81683700  | -0.36399800 |
| H  | 7.54351800  | -0.49018500 | 0.22332700  |
| H  | 5.85521900  | -2.30921100 | 0.34607400  |
| Cl | 1.64909100  | 1.91300000  | -1.22041600 |
| S  | 2.84570200  | -2.11871900 | -0.15851600 |
| C  | 1.71424800  | -0.77094400 | -0.58733200 |
| C  | 0.49303000  | -1.20653200 | -2.17867300 |
| Pd | -0.16512600 | -1.17633900 | 0.04604000  |
| O  | -1.98699400 | -2.15978000 | 0.62857800  |
| S  | -3.27757600 | -1.65795400 | 1.48693100  |
| C  | -3.49005800 | 0.16367700  | 1.19606800  |
| H  | -4.38478900 | 0.46081700  | 1.74968100  |
| H  | -2.60530400 | 0.70025000  | 1.55446800  |
| H  | -3.62733600 | 0.31131600  | 0.12165400  |
| C  | -2.68142800 | -1.59975500 | 3.24862800  |
| H  | -1.75313500 | -1.01971500 | 3.27623100  |
| H  | -3.48007300 | -1.15198300 | 3.84583100  |
| H  | -2.50597200 | -2.63544400 | 3.54215000  |
| Cl | 0.46584000  | -0.27030400 | 2.32842100  |
| C  | -0.83403100 | -1.63815700 | -1.92100800 |
| H  | 0.63775500  | -0.22864900 | -2.63630600 |
| H  | 1.21301300  | -1.96661100 | -2.47170000 |
| C  | -2.03604700 | -0.82958100 | -2.14362600 |
| C  | -3.27034600 | -1.49005100 | -2.24012900 |

|    |             |             |             |
|----|-------------|-------------|-------------|
| C  | -2.01134200 | 0.57110800  | -2.21094500 |
| C  | -4.44489400 | -0.77154700 | -2.41388700 |
| H  | -3.29527800 | -2.57604400 | -2.16600000 |
| C  | -3.18997600 | 1.29007900  | -2.36380200 |
| H  | -1.07707400 | 1.11848900  | -2.09257600 |
| C  | -4.40777400 | 0.62133300  | -2.47274900 |
| H  | -5.39370500 | -1.29677300 | -2.49662100 |
| H  | -3.14703400 | 2.37585400  | -2.35578000 |
| H  | -5.32899400 | 1.18629800  | -2.59365300 |
| H  | -1.00410300 | -2.71671200 | -1.87009000 |
| Ag | -0.40628700 | 1.76203300  | 1.13807100  |
| Cl | -1.83612200 | 3.41399400  | 0.14960400  |

### IM9

|    |             |             |             |
|----|-------------|-------------|-------------|
| C  | -4.69014700 | -0.99670100 | 0.33592200  |
| C  | -4.91989800 | 0.31421900  | -0.11315700 |
| C  | -6.23228000 | 0.73544100  | -0.35204800 |
| C  | -7.27191100 | -0.15243800 | -0.13974800 |
| C  | -7.02409400 | -1.45701500 | 0.30776800  |
| C  | -5.72988900 | -1.89270400 | 0.55078900  |
| C  | -3.68606300 | 1.03279100  | -0.25789500 |
| H  | -6.41667500 | 1.74855600  | -0.70167700 |
| H  | -8.29496700 | 0.16495000  | -0.32417000 |
| H  | -7.85545400 | -2.13938600 | 0.46551600  |
| H  | -5.53215600 | -2.90444900 | 0.89566000  |
| Cl | -3.66478100 | 2.71608400  | -0.81637600 |
| S  | -2.94417900 | -1.32392200 | 0.57057900  |
| C  | -2.56120000 | 0.35257700  | 0.05490900  |
| C  | -1.15088100 | 0.80722000  | 0.00711100  |
| Pd | 0.53845300  | -0.85309000 | 0.24634700  |
| O  | 1.50800400  | -1.50986700 | 2.03943200  |
| S  | 3.13048700  | -1.60054800 | 2.17982100  |
| C  | 3.83271200  | -0.28849200 | 1.06554300  |
| H  | 4.92105900  | -0.38161300 | 1.11022500  |
| H  | 3.45327000  | -0.45291300 | 0.04967600  |
| H  | 3.50178100  | 0.67830900  | 1.45636900  |
| C  | 3.59647600  | -3.10014800 | 1.18436100  |
| H  | 3.12388800  | -3.01748900 | 0.19861600  |
| H  | 4.68762000  | -3.13030300 | 1.12768500  |
| H  | 3.20957200  | -3.95848100 | 1.73496400  |
| Cl | 1.44158800  | -2.43890000 | -1.58869400 |
| C  | -0.37035000 | 0.67064900  | 1.26601800  |
| H  | -0.62735600 | 0.16495100  | -0.83052500 |



|    |             |             |             |
|----|-------------|-------------|-------------|
| H  | -1.07665300 | 1.80365500  | -0.44763200 |
| C  | 0.69004100  | 1.59729600  | 1.65318200  |
| C  | 1.13794200  | 1.58131100  | 2.98599600  |
| C  | 1.34797600  | 2.42312300  | 0.72763200  |
| C  | 2.21300300  | 2.36486300  | 3.37915300  |
| H  | 0.63753200  | 0.93200700  | 3.70213900  |
| C  | 2.43377700  | 3.19370400  | 1.12113400  |
| H  | 1.06261800  | 2.43919200  | -0.32368000 |
| C  | 2.86702200  | 3.17038500  | 2.44554700  |
| H  | 2.54465000  | 2.34913000  | 4.41474400  |
| H  | 2.94767600  | 3.79384500  | 0.37455800  |
| H  | 3.71434600  | 3.77975300  | 2.75150700  |
| H  | -0.90118300 | 0.20599500  | 2.10380900  |
| Ag | 2.13477600  | -0.14712000 | -2.21969100 |
| Cl | 2.80311900  | 2.12370100  | -2.44313100 |

#### TS4

|    |             |             |             |
|----|-------------|-------------|-------------|
| C  | -4.55278900 | -1.35027200 | 0.12678200  |
| C  | -4.52100100 | 0.05398100  | 0.16496500  |
| C  | -5.68012900 | 0.77552200  | -0.14382600 |
| C  | -6.83145600 | 0.08499400  | -0.47625200 |
| C  | -6.84646300 | -1.31604200 | -0.50479600 |
| C  | -5.70787600 | -2.04851300 | -0.20213400 |
| C  | -3.22166700 | 0.52807400  | 0.53082100  |
| H  | -5.65899300 | 1.86252900  | -0.11972200 |
| H  | -7.73642800 | 0.63556200  | -0.71951800 |
| H  | -7.76223600 | -1.83886900 | -0.76907600 |
| H  | -5.71565800 | -3.13503900 | -0.22567400 |
| Cl | -2.84261100 | 2.25147100  | 0.58565200  |
| S  | -2.96846900 | -2.06854800 | 0.54866300  |
| C  | -2.28248800 | -0.42077100 | 0.77416300  |
| C  | -0.88382700 | -0.20951400 | 1.12871300  |
| Pd | 0.49609700  | -0.48493200 | -0.64785500 |
| O  | 1.56159000  | -2.33390200 | -1.07498200 |
| S  | 3.16721500  | -2.42215000 | -1.32285800 |
| C  | 3.90274400  | -0.83697500 | -0.67942100 |
| H  | 4.96787700  | -0.86136200 | -0.92541400 |
| H  | 3.38878600  | -0.00094700 | -1.16523800 |
| H  | 3.75149200  | -0.83483100 | 0.40308200  |
| C  | 3.34311700  | -2.08543300 | -3.14611600 |
| H  | 2.83831400  | -1.13875000 | -3.36064600 |
| H  | 4.41049200  | -2.05875500 | -3.37963300 |
| H  | 2.85163800  | -2.91880300 | -3.64961700 |

|    |              |              |              |
|----|--------------|--------------|--------------|
| Cl | 1. 28813200  | 0. 82555300  | -2. 68129500 |
| C  | 0. 03893600  | -1. 27693800 | 1. 27375900  |
| H  | -0. 37815600 | 0. 74192700  | -0. 16392500 |
| H  | -0. 70256700 | 0. 70814500  | 1. 69684700  |
| C  | 1. 29512800  | -1. 19956500 | 2. 02558600  |
| C  | 2. 03077700  | -2. 37834900 | 2. 21769600  |
| C  | 1. 81806100  | 0. 01312100  | 2. 49944000  |
| C  | 3. 26024600  | -2. 34591300 | 2. 86417000  |
| H  | 1. 63283700  | -3. 31744700 | 1. 83540200  |
| C  | 3. 05209300  | 0. 04233100  | 3. 13437000  |
| H  | 1. 29339900  | 0. 95664700  | 2. 34691400  |
| C  | 3. 77619800  | -1. 13452600 | 3. 32167200  |
| H  | 3. 81677300  | -3. 26842100 | 3. 01344400  |
| H  | 3. 44325700  | 0. 99722200  | 3. 47790900  |
| H  | 4. 73920200  | -1. 10835000 | 3. 82639900  |
| H  | -0. 31399100 | -2. 28967000 | 1. 05936400  |
| Ag | 1. 34428200  | 2. 33906700  | -0. 66281500 |
| Cl | 1. 40871300  | 3. 41656700  | 1. 46635900  |

## IM10

|    |              |              |              |
|----|--------------|--------------|--------------|
| C  | -4. 59845000 | -1. 19186900 | 0. 15303600  |
| C  | -4. 55016000 | 0. 21034900  | 0. 23871500  |
| C  | -5. 70276700 | 0. 95455700  | -0. 04056700 |
| C  | -6. 86277500 | 0. 28853200  | -0. 39246600 |
| C  | -6. 89321800 | -1. 11029100 | -0. 47074700 |
| C  | -5. 76156100 | -1. 86514500 | -0. 19757500 |
| C  | -3. 24584100 | 0. 65651200  | 0. 61915900  |
| H  | -5. 67018600 | 2. 03974700  | 0. 02227200  |
| H  | -7. 76264700 | 0. 85694300  | -0. 61250700 |
| H  | -7. 81564300 | -1. 61353400 | -0. 74954000 |
| H  | -5. 78127300 | -2. 95013100 | -0. 25851700 |
| Cl | -2. 85506400 | 2. 37501200  | 0. 74528900  |
| S  | -3. 02318400 | -1. 94415500 | 0. 54947800  |
| C  | -2. 31578100 | -0. 31235600 | 0. 83015500  |
| C  | -0. 93384500 | -0. 12682900 | 1. 21235800  |
| Pd | 0. 37016900  | -0. 41375900 | -0. 63324800 |
| O  | 1. 23379300  | -2. 42910200 | -0. 80419000 |
| S  | 2. 81729700  | -2. 73539400 | -1. 01214500 |
| C  | 3. 75394200  | -1. 16101700 | -0. 66419000 |
| H  | 4. 80544600  | -1. 37796500 | -0. 87201200 |
| H  | 3. 36064700  | -0. 37445600 | -1. 31512900 |
| H  | 3. 60699200  | -0. 92793400 | 0. 39357900  |
| C  | 3. 00045200  | -2. 75235100 | -2. 86515700 |

|    |             |             |             |
|----|-------------|-------------|-------------|
| H  | 2.58336600  | -1.81647300 | -3.24629200 |
| H  | 4.06212100  | -2.86732700 | -3.09765900 |
| H  | 2.42627700  | -3.61188800 | -3.21277200 |
| Cl | 1.30852100  | 0.47194600  | -2.76764100 |
| C  | -0.02004900 | -1.15671100 | 1.41539000  |
| H  | -0.26866300 | 0.99733400  | -0.56847400 |
| H  | -0.70939500 | 0.86959700  | 1.59692700  |
| C  | 1.26339500  | -1.03627600 | 2.11237500  |
| C  | 1.98300900  | -2.20845600 | 2.38557700  |
| C  | 1.82008500  | 0.20105300  | 2.46993500  |
| C  | 3.22831000  | -2.14718400 | 2.99961300  |
| H  | 1.55717600  | -3.16842900 | 2.09663100  |
| C  | 3.07063000  | 0.25946900  | 3.06924200  |
| H  | 1.30792800  | 1.13755300  | 2.25097200  |
| C  | 3.77759900  | -0.91204500 | 3.33867500  |
| H  | 3.77184800  | -3.06475200 | 3.21350400  |
| H  | 3.49044100  | 1.23206400  | 3.31449900  |
| H  | 4.75489700  | -0.86165700 | 3.81308000  |
| H  | -0.34850500 | -2.18151200 | 1.22470200  |
| Ag | 1.60678200  | 2.19656500  | -0.89082300 |
| Cl | 1.98352200  | 3.52028400  | 1.05528500  |

## P

|    |             |             |             |
|----|-------------|-------------|-------------|
| C  | -3.01774200 | -0.97809200 | 0.05675400  |
| C  | -2.74828800 | 0.39944300  | -0.01478200 |
| C  | -3.82023000 | 1.30094600  | -0.04818900 |
| C  | -5.11381400 | 0.81378200  | -0.00795100 |
| C  | -5.36292400 | -0.56354300 | 0.06568800  |
| C  | -4.31576300 | -1.47246400 | 0.09916700  |
| C  | -1.34088200 | 0.65809700  | -0.04688900 |
| H  | -3.62129100 | 2.36828400  | -0.10479900 |
| H  | -5.94962200 | 1.50842200  | -0.03324500 |
| H  | -6.38760100 | -0.92540400 | 0.09652900  |
| H  | -4.50126000 | -2.54225500 | 0.15586400  |
| Cl | -0.76497600 | 2.33553200  | -0.16417800 |
| S  | -1.51296700 | -1.93556600 | 0.08433300  |
| C  | -0.51659200 | -0.42692500 | -0.00416100 |
| C  | 0.91097300  | -0.62171500 | -0.02365500 |
| C  | 1.87492600  | 0.31769600  | 0.05178100  |
| C  | 3.31006800  | 0.06287500  | 0.02241700  |
| C  | 3.86739700  | -1.19522100 | -0.25421700 |
| C  | 4.18325600  | 1.12908000  | 0.27981200  |
| C  | 5.24143000  | -1.37724000 | -0.25712400 |

|   |            |             |             |
|---|------------|-------------|-------------|
| H | 3.22069000 | -2.03964000 | -0.48367200 |
| C | 5.55986800 | 0.94730900  | 0.27740500  |
| H | 3.76370600 | 2.11249300  | 0.48802500  |
| C | 6.09506300 | -0.30837000 | 0.01098300  |
| H | 5.65353900 | -2.35990300 | -0.47524600 |
| H | 6.21677400 | 1.78913800  | 0.48347700  |
| H | 7.17247000 | -0.45503100 | 0.00594100  |
| H | 1.21219100 | -1.66822900 | -0.09337700 |
| H | 1.59198800 | 1.36320200  | 0.15997700  |

## Cartesian Coordinates for the Stationary Points Given in Figure 2.

### IM11

|    |             |             |             |
|----|-------------|-------------|-------------|
| C  | -4.34341600 | -1.99772000 | 0.60172200  |
| C  | -4.62213900 | -0.86628400 | -0.18398400 |
| C  | -5.95392600 | -0.47974200 | -0.38795900 |
| C  | -6.96424200 | -1.22466200 | 0.18817600  |
| C  | -6.66906900 | -2.35385900 | 0.96750900  |
| C  | -5.35958400 | -2.75108400 | 1.18212500  |
| C  | -3.41932800 | -0.26419300 | -0.67615600 |
| H  | -6.17199800 | 0.39655900  | -0.99345900 |
| H  | -8.00056700 | -0.93450300 | 0.03648800  |
| H  | -7.47996800 | -2.92555400 | 1.41214500  |
| H  | -5.12738700 | -3.62428300 | 1.78633300  |
| Cl | -3.52136800 | 1.19414300  | -1.66628300 |
| S  | -2.59289500 | -2.29874500 | 0.74197300  |
| C  | -2.26174800 | -0.87653700 | -0.30296700 |
| C  | -0.86404900 | -0.50986400 | -0.59545900 |
| O  | 0.03006100  | -1.18614900 | 0.03385900  |
| Pd | 1.96338100  | -0.44190800 | -0.12644800 |
| O  | 1.26582800  | 1.24729300  | 0.77251100  |
| O  | 2.29255800  | -2.16060600 | -1.17398500 |
| S  | 2.27629300  | 2.05204800  | 1.82187500  |
| S  | 3.52389100  | -3.22179300 | -0.94249200 |
| C  | 0.98478900  | 2.85522800  | 2.88369700  |
| H  | 1.51398900  | 3.45316200  | 3.62989300  |
| H  | 0.34277700  | 3.46955100  | 2.23858900  |
| H  | 0.43907500  | 2.03577400  | 3.35349600  |
| C  | 2.82034100  | 3.51263700  | 0.81282200  |
| H  | 1.92158700  | 4.04045200  | 0.46878800  |
| H  | 3.44335200  | 4.13068900  | 1.46466900  |
| H  | 3.40544800  | 3.08374700  | -0.00268100 |
| C  | 4.92142500  | -2.49549300 | -1.92817900 |
| H  | 4.60789900  | -2.55560300 | -2.97110000 |

|    |             |             |             |
|----|-------------|-------------|-------------|
| H  | 5.05485700  | -1.45881600 | -1.60785700 |
| H  | 5.80364300  | -3.11498500 | -1.74745200 |
| C  | 4.16897100  | -2.95974000 | 0.78018000  |
| H  | 3.34153700  | -3.22787300 | 1.44239200  |
| H  | 5.01087200  | -3.64712200 | 0.89885800  |
| H  | 4.46314000  | -1.91046300 | 0.88010200  |
| Cl | 0.76113600  | -3.91255300 | 1.29319400  |
| O  | -0.61307200 | 0.40516400  | -1.40048900 |
| Cl | 4.19137200  | 0.41383400  | -0.17376300 |
| H  | 0.33464000  | -2.81743900 | 0.68432300  |
| Ag | -0.60941600 | 2.47915000  | -0.67262100 |
| Cl | -0.50900200 | 4.71237100  | 0.22981000  |

## IM12

|    |             |             |             |
|----|-------------|-------------|-------------|
| C  | 4.83880300  | 0.87260200  | 0.59227600  |
| C  | 4.81505600  | -0.42434600 | 0.05131400  |
| C  | 6.01231300  | -1.14261400 | -0.06341200 |
| C  | 7.19164400  | -0.55644500 | 0.35545900  |
| C  | 7.19804800  | 0.74020700  | 0.89004800  |
| C  | 6.02390300  | 1.46611100  | 1.01420800  |
| C  | 3.48584300  | -0.81578500 | -0.32127900 |
| H  | 5.99586800  | -2.14660600 | -0.48021500 |
| H  | 8.12588500  | -1.10505500 | 0.26880400  |
| H  | 8.13670000  | 1.18339800  | 1.21365600  |
| H  | 6.02568200  | 2.47069500  | 1.42966300  |
| Cl | 3.20082700  | -2.42028100 | -0.99170200 |
| S  | 3.20723600  | 1.59127300  | 0.65918400  |
| C  | 2.51937900  | 0.11007600  | -0.09035100 |
| C  | 1.06264500  | 0.05603400  | -0.34018500 |
| O  | 0.39463900  | 0.96538700  | 0.25833400  |
| Pd | -1.61215700 | 1.17643900  | -0.16792300 |
| O  | -1.96509700 | -0.52604700 | 0.89303800  |
| O  | -1.05073000 | 2.70901500  | -1.38614300 |
| S  | -3.46246900 | -0.75342100 | 1.59076900  |
| S  | -0.83340400 | 4.20233100  | -0.74494700 |
| C  | -3.00874800 | -2.18618900 | 2.67777100  |
| H  | -3.91354100 | -2.47638700 | 3.21757700  |
| H  | -2.63069400 | -2.99359800 | 2.03629500  |
| H  | -2.24652700 | -1.80931200 | 3.36083600  |
| C  | -4.44553800 | -1.65095100 | 0.29204700  |
| H  | -3.90276300 | -2.56437100 | 0.01880100  |
| H  | -5.41838400 | -1.86317400 | 0.74396300  |
| H  | -4.54355500 | -0.94109200 | -0.53132800 |

|    |             |             |             |
|----|-------------|-------------|-------------|
| C  | -2.54320600 | 4.81257800  | -0.34071700 |
| H  | -3.04323100 | 4.96631700  | -1.29783700 |
| H  | -3.06435000 | 4.03797800  | 0.23068400  |
| H  | -2.42571700 | 5.75337400  | 0.20348400  |
| C  | -0.21154000 | 3.92264400  | 0.98308400  |
| H  | 0.72366400  | 3.36740300  | 0.88558700  |
| H  | -0.06168400 | 4.90657000  | 1.43458700  |
| H  | -0.95346100 | 3.32131400  | 1.51801700  |
| Cl | -3.90970800 | 1.67445800  | -0.46833500 |
| O  | 0.61886900  | -0.82497200 | -1.09793400 |
| Ag | -0.81683500 | -2.39192900 | -0.60872100 |
| Cl | -2.14102000 | -4.32808900 | -0.04221200 |

### IM13

|    |             |             |             |
|----|-------------|-------------|-------------|
| C  | -5.17863700 | -1.18989600 | -0.25654400 |
| C  | -5.23877700 | 0.20898000  | -0.13792000 |
| C  | -6.48722500 | 0.84324600  | -0.08037700 |
| C  | -7.63421700 | 0.07598900  | -0.14166600 |
| C  | -7.55858400 | -1.32009200 | -0.26171500 |
| C  | -6.33367300 | -1.96471400 | -0.32029800 |
| C  | -3.92787200 | 0.78775900  | -0.08879200 |
| H  | -6.53532600 | 1.92547500  | 0.01203100  |
| H  | -8.60766700 | 0.55765900  | -0.09671200 |
| H  | -8.47357300 | -1.90571200 | -0.30883700 |
| H  | -6.27112300 | -3.04609400 | -0.41328600 |
| Cl | -3.76155600 | 2.53663400  | 0.06383300  |
| S  | -3.50016700 | -1.78417900 | -0.30593200 |
| C  | -2.89764800 | -0.09718500 | -0.16286300 |
| C  | -1.43449800 | 0.12241300  | -0.13180300 |
| O  | -1.01063500 | 1.29006000  | -0.05654300 |
| Pd | 1.26282100  | -1.05402800 | -0.32910200 |
| O  | 3.29037000  | -1.25182600 | -0.35358500 |
| S  | 4.12321200  | -0.99402800 | -1.76456300 |
| C  | 4.48181000  | 0.83316600  | -1.76637500 |
| H  | 5.44450300  | 0.97282900  | -2.26537300 |
| H  | 3.66259900  | 1.30009800  | -2.31442400 |
| H  | 4.47851100  | 1.16676300  | -0.71982200 |
| C  | 5.75581900  | -1.57311600 | -1.10688000 |
| H  | 5.63561200  | -2.63367500 | -0.88473300 |
| H  | 6.51691800  | -1.41176700 | -1.87349200 |
| H  | 5.95788600  | -0.99885900 | -0.19906300 |
| Cl | 1.21781500  | 0.08678600  | -2.41595700 |
| O  | -0.75850600 | -0.96401000 | -0.15478600 |

|    |             |             |            |
|----|-------------|-------------|------------|
| O  | 1.28768900  | -2.20321600 | 1.37726800 |
| S  | 1.64471100  | -1.57799100 | 2.84711000 |
| C  | 0.62232500  | -0.03741700 | 3.01722900 |
| H  | 0.74623100  | 0.31300600  | 4.04500900 |
| H  | 0.97789800  | 0.70896100  | 2.29687900 |
| H  | -0.40805500 | -0.33874900 | 2.82076200 |
| C  | 3.33056500  | -0.80918300 | 2.70763900 |
| H  | 4.02266600  | -1.63478200 | 2.53627900 |
| H  | 3.33742700  | -0.08625600 | 1.88368100 |
| H  | 3.52124000  | -0.32148200 | 3.66774700 |
| Ag | 1.11588600  | 1.86858500  | 0.03386000 |
| Cl | 3.23233200  | 2.40868500  | 1.10613100 |

### Cartesian Coordinates for the Stationary Points Given in Figure 3.

#### H-A

|   |             |             |             |
|---|-------------|-------------|-------------|
| C | -1.08389700 | -0.63590500 | 0.00017100  |
| C | -0.97109000 | 0.77042000  | 0.00012000  |
| C | -2.14238000 | 1.54452100  | 0.00022800  |
| C | -3.37294700 | 0.91617000  | 0.00038800  |
| C | -3.46096300 | -0.48456600 | 0.00044200  |
| C | -2.32141000 | -1.27255500 | 0.00033500  |
| C | 0.39085400  | 1.20377700  | -0.00005800 |
| H | -2.06865200 | 2.62999200  | 0.00018200  |
| H | -4.28330000 | 1.51027700  | 0.00047300  |
| H | -4.43897800 | -0.95985100 | 0.00058200  |
| H | -2.39041100 | -2.35724500 | 0.00039000  |
| S | 0.51236400  | -1.43159800 | 0.00006200  |
| C | 1.28579800  | 0.18363000  | -0.00016400 |
| C | 2.73876700  | 0.35659000  | -0.00040700 |
| O | 3.40005800  | -0.81447000 | -0.00049300 |
| H | 4.34301000  | -0.59200900 | -0.00065200 |
| O | 3.29362100  | 1.43214000  | -0.00052700 |
| H | 0.71469100  | 2.24056300  | -0.00014100 |

#### H-IM1

|   |             |             |             |
|---|-------------|-------------|-------------|
| C | -4.54045100 | -0.58185900 | 0.37037100  |
| C | -4.74389900 | 0.60624200  | -0.36207800 |
| C | -6.04218200 | 0.92880600  | -0.79221900 |
| C | -7.08714600 | 0.08049500  | -0.48747400 |
| C | -6.86237100 | -1.09791300 | 0.24382500  |
| C | -5.59283500 | -1.44118700 | 0.67718000  |
| C | -3.53356200 | 1.33240000  | -0.55484500 |

|    |             |             |             |
|----|-------------|-------------|-------------|
| H  | -6.20954300 | 1.84231700  | -1.35902300 |
| H  | -8.09502100 | 0.32264200  | -0.81493800 |
| H  | -7.69945700 | -1.75270500 | 0.47399200  |
| H  | -5.41941600 | -2.35391000 | 1.24139000  |
| S  | -2.83369400 | -0.81304900 | 0.82077200  |
| C  | -2.44404700 | 0.73678800  | 0.00421100  |
| C  | -1.10708600 | 1.31126000  | -0.07593000 |
| O  | -0.10926200 | 0.70794300  | 0.61653900  |
| Pd | 1.63331000  | 0.02990600  | -0.39797600 |
| O  | 2.88218100  | 1.04898900  | 0.92630300  |
| O  | 3.29243600  | -0.74115900 | -1.22584700 |
| S  | 2.99953400  | 2.67193400  | 0.73268200  |
| S  | 3.78702900  | -2.16232300 | -0.53337600 |
| C  | 1.44280400  | 3.36781900  | 1.48039000  |
| H  | 1.59168600  | 4.44682100  | 1.56698900  |
| H  | 0.59598300  | 3.11313800  | 0.83699800  |
| H  | 1.35955600  | 2.89863200  | 2.46242400  |
| C  | 2.62861600  | 2.98793100  | -1.06521600 |
| H  | 1.58313300  | 2.72166200  | -1.26040900 |
| H  | 2.82209500  | 4.04875000  | -1.24691300 |
| H  | 3.31930100  | 2.35635900  | -1.62885300 |
| C  | 3.88886900  | -1.83221700 | 1.29542100  |
| H  | 4.55562100  | -0.97696100 | 1.41045700  |
| H  | 2.87692400  | -1.62693500 | 1.67775600  |
| H  | 4.31521200  | -2.73864500 | 1.73401500  |
| C  | 2.31708400  | -3.30696400 | -0.55506000 |
| H  | 1.91093600  | -3.24758500 | -1.56686700 |
| H  | 2.71798100  | -4.29913700 | -0.33050200 |
| H  | 1.58600000  | -2.96362800 | 0.19198600  |
| Cl | 0.41440800  | -1.69029600 | 2.04782100  |
| O  | -0.84852500 | 2.32829300  | -0.68764300 |
| Cl | 0.28178400  | -1.00008700 | -2.02425200 |
| H  | -0.24735900 | -0.14948100 | 1.18290700  |
| H  | -3.45444300 | 2.27240200  | -1.09268600 |

### H-TS1

|   |            |             |             |
|---|------------|-------------|-------------|
| C | 4.77151700 | -0.75914300 | -0.25847800 |
| C | 4.91883100 | 0.52653700  | 0.30163900  |
| C | 6.21266700 | 1.02945900  | 0.51602200  |
| C | 7.30631200 | 0.25842700  | 0.17451900  |
| C | 7.13605700 | -1.01860200 | -0.38346500 |
| C | 5.87171700 | -1.53898400 | -0.60514600 |
| C | 3.66106900 | 1.14303000  | 0.57561000  |



|    |             |             |             |
|----|-------------|-------------|-------------|
| H  | 6.33992200  | 2.01925100  | 0.94989600  |
| H  | 8.31048200  | 0.64160600  | 0.33799900  |
| H  | 8.01014100  | -1.61000400 | -0.64561300 |
| H  | 5.73893900  | -2.52769600 | -1.03691000 |
| S  | 3.05988700  | -1.21439300 | -0.44652600 |
| C  | 2.59127900  | 0.37283600  | 0.24331200  |
| C  | 1.19714100  | 0.78033000  | 0.44262500  |
| O  | 0.26955000  | -0.07100700 | 0.04205900  |
| Pd | -1.75120800 | 0.04747200  | 0.45462300  |
| O  | -2.08277100 | 1.21205800  | -1.24892300 |
| O  | -3.75710700 | -0.06470600 | 0.67504200  |
| S  | -2.24818500 | 2.83204300  | -1.01651100 |
| S  | -4.42758800 | -1.34492000 | -0.12889000 |
| C  | -0.54779300 | 3.47334900  | -1.40440800 |
| H  | -0.58443200 | 4.56320200  | -1.33229100 |
| H  | 0.14942400  | 3.03213000  | -0.68485600 |
| H  | -0.34097600 | 3.15367800  | -2.42668500 |
| C  | -2.23079600 | 3.09737500  | 0.82667200  |
| H  | -1.29670300 | 2.67358200  | 1.21676200  |
| H  | -2.29559500 | 4.17831300  | 0.98372300  |
| H  | -3.11237900 | 2.58768700  | 1.22149400  |
| C  | -3.85207400 | -1.21794100 | -1.89625500 |
| H  | -4.14108500 | -0.22550400 | -2.24276600 |
| H  | -2.76365200 | -1.35816200 | -1.93545400 |
| H  | -4.38552700 | -2.00627300 | -2.43450800 |
| C  | -3.46649500 | -2.86152400 | 0.37229000  |
| H  | -3.38642600 | -2.82299600 | 1.46062900  |
| H  | -4.06322500 | -3.71153200 | 0.03028300  |
| H  | -2.47360900 | -2.82898400 | -0.09473900 |
| Cl | -0.30645200 | -2.16851400 | -1.60302900 |
| O  | 0.90420700  | 1.85622300  | 0.94503500  |
| Cl | -1.41054500 | -1.16179200 | 2.43378000  |
| H  | 0.26934700  | -0.99027600 | -0.68189400 |
| H  | 3.53643400  | 2.12836400  | 1.01499000  |

## H-IM2

|   |            |             |             |
|---|------------|-------------|-------------|
| C | 4.80504900 | -0.86977200 | -0.44885500 |
| C | 4.86394800 | 0.17296100  | 0.49889200  |
| C | 6.12062400 | 0.63195500  | 0.92191500  |
| C | 7.26749400 | 0.05922100  | 0.40411800  |
| C | 7.18649900 | -0.97582800 | -0.53929900 |
| C | 5.95756700 | -1.44876800 | -0.97252900 |
| C | 3.56307500 | 0.62044800  | 0.89493100  |

|    |             |             |             |
|----|-------------|-------------|-------------|
| H  | 6.18087300  | 1.43434100  | 1.65487600  |
| H  | 8.24291000  | 0.41235300  | 0.73033700  |
| H  | 8.09937900  | -1.41422800 | -0.93607700 |
| H  | 5.89242100  | -2.25227100 | -1.70242300 |
| S  | 3.12225500  | -1.30665900 | -0.84506200 |
| C  | 2.54832100  | -0.04272700 | 0.28794600  |
| C  | 1.10224600  | 0.21188200  | 0.48879900  |
| O  | 0.34012400  | -0.57853200 | -0.18363400 |
| Pd | -1.62328200 | -0.21445400 | -0.03425000 |
| O  | -1.37231100 | 1.42721400  | -1.27343700 |
| O  | -3.62980100 | 0.33402200  | 0.04589400  |
| S  | -1.67149100 | 2.92763900  | -0.66062400 |
| S  | -4.83638900 | -0.64945500 | -0.47387300 |
| C  | 0.05172700  | 3.61183200  | -0.51377500 |
| H  | -0.02637600 | 4.61564100  | -0.08813300 |
| H  | 0.61544100  | 2.91910300  | 0.12246100  |
| H  | 0.44389900  | 3.64665600  | -1.53102000 |
| C  | -2.01504100 | 2.68997600  | 1.15349000  |
| H  | -1.18187800 | 2.09353400  | 1.54639100  |
| H  | -2.06942100 | 3.69065600  | 1.59229600  |
| H  | -2.97124300 | 2.16539700  | 1.21765600  |
| C  | -4.01499500 | -1.96158300 | -1.50051100 |
| H  | -3.52520800 | -1.43407900 | -2.32166700 |
| H  | -3.28651300 | -2.48041200 | -0.86685600 |
| H  | -4.80848200 | -2.61792100 | -1.86819500 |
| C  | -5.27025100 | -1.65449600 | 1.02956700  |
| H  | -5.73109800 | -0.95723700 | 1.73034500  |
| H  | -5.98310400 | -2.42067000 | 0.71364900  |
| H  | -4.33412900 | -2.06741600 | 1.42244100  |
| Cl | -1.86998400 | -2.18937500 | 1.25783900  |
| O  | 0.74980100  | 1.13305400  | 1.23678700  |
| H  | 3.37313600  | 1.40975200  | 1.61609300  |

### H-IM3

|   |             |             |             |
|---|-------------|-------------|-------------|
| C | -4.69888500 | 0.62897300  | 0.04150800  |
| C | -4.81098000 | -0.75491900 | -0.21228000 |
| C | -6.05294200 | -1.38154600 | -0.02248300 |
| C | -7.13376700 | -0.63501400 | 0.40510200  |
| C | -7.00078000 | 0.74057300  | 0.65136300  |
| C | -5.78646300 | 1.38353700  | 0.47297600  |
| C | -3.57578400 | -1.32838100 | -0.64623900 |
| H | -6.15198200 | -2.44804900 | -0.21472900 |
| H | -8.09860500 | -1.11403400 | 0.55253000  |

|    |             |             |             |
|----|-------------|-------------|-------------|
| H  | -7.86342300 | 1.31171600  | 0.98634900  |
| H  | -5.68284900 | 2.44881300  | 0.66370700  |
| S  | -3.04825000 | 1.22821600  | -0.26102300 |
| C  | -2.55855500 | -0.43229400 | -0.72531000 |
| C  | -1.17155000 | -0.69315800 | -1.12427000 |
| O  | -0.35676300 | 0.30001200  | -1.13882400 |
| Pd | 0.68635600  | 0.93333400  | 0.58371600  |
| O  | 0.68787700  | 2.78763600  | -0.22196700 |
| S  | 1.95181100  | 3.11184200  | -1.23081900 |
| C  | 3.49320900  | 2.58396100  | -0.32744900 |
| H  | 3.44559300  | 3.05861500  | 0.65476000  |
| H  | 3.50369900  | 1.49124100  | -0.24112200 |
| H  | 4.33176000  | 2.95067700  | -0.92528000 |
| C  | 1.91850400  | 1.81030500  | -2.57549200 |
| H  | 0.86945500  | 1.51645900  | -2.66848900 |
| H  | 2.29365400  | 2.29393000  | -3.47961900 |
| H  | 2.54029100  | 0.95912400  | -2.27385500 |
| Cl | 1.77233900  | 1.73726500  | 2.52553100  |
| O  | -0.84631100 | -1.85539800 | -1.46103600 |
| O  | 0.69029200  | -0.98138100 | 1.29696400  |
| S  | 2.08418300  | -1.38047100 | 2.10994800  |
| C  | 2.17007400  | -3.17185200 | 1.63616300  |
| H  | 2.69004000  | -3.19403000 | 0.67375400  |
| H  | 2.73856400  | -3.69889800 | 2.40654900  |
| H  | 1.13897300  | -3.52773500 | 1.56065400  |
| C  | 1.39380000  | -1.55354400 | 3.82204800  |
| H  | 2.15156200  | -2.02200200 | 4.45463500  |
| H  | 1.18039900  | -0.53093200 | 4.13988500  |
| H  | 0.48266700  | -2.15148600 | 3.74557700  |
| Ag | 1.36612100  | -1.71285500 | -1.51128600 |
| Cl | 3.69941600  | -1.24339200 | -1.07666000 |
| H  | -3.43442000 | -2.37591700 | -0.89588000 |

#### H-IM4

|   |             |            |             |
|---|-------------|------------|-------------|
| C | -3.30505800 | 2.12994700 | 0.29631700  |
| C | -2.65352300 | 2.80170900 | -0.75610100 |
| C | -3.42303200 | 3.55894200 | -1.65173200 |
| C | -4.79428800 | 3.62673000 | -1.48351700 |
| C | -5.42196500 | 2.94826600 | -0.42873900 |
| C | -4.68386000 | 2.19535400 | 0.47226700  |
| C | -1.23491800 | 2.59489900 | -0.73582400 |
| H | -2.93422900 | 4.08743100 | -2.46763800 |
| H | -5.39421700 | 4.21489100 | -2.17342100 |

|    |             |             |             |
|----|-------------|-------------|-------------|
| H  | -6.50090600 | 3.01654100  | -0.31246700 |
| H  | -5.16703800 | 1.67591800  | 1.29698900  |
| S  | -2.15535600 | 1.20781500  | 1.30932400  |
| C  | -0.80941400 | 1.77445800  | 0.25506800  |
| C  | 0.60405500  | 1.39195500  | 0.49054900  |
| O  | 0.91901900  | 0.20997000  | 0.85432300  |
| Pd | -0.23513200 | -1.41793300 | 0.41604700  |
| O  | 0.17641400  | -1.15754100 | -1.61289400 |
| O  | -1.23754000 | -3.11548800 | -0.13583200 |
| S  | 1.52105500  | -1.91010200 | -2.20106900 |
| S  | -2.81972700 | -2.94472600 | -0.54892200 |
| C  | 1.64796300  | -3.50602700 | -1.25591700 |
| H  | 2.51066700  | -4.04285500 | -1.65843500 |
| H  | 1.76924000  | -3.27154400 | -0.19370600 |
| H  | 0.71349500  | -4.04376300 | -1.42187700 |
| C  | 2.93058500  | -0.99658000 | -1.40676000 |
| H  | 2.72903400  | -0.93964500 | -0.33272100 |
| H  | 3.85805500  | -1.53180600 | -1.62440800 |
| H  | 2.94905300  | -0.00464100 | -1.86210400 |
| C  | -3.70065200 | -2.51730100 | 1.03067400  |
| H  | -3.72436100 | -3.42975200 | 1.62742400  |
| H  | -3.12382100 | -1.74168500 | 1.54585600  |
| H  | -4.70706300 | -2.19531000 | 0.74856800  |
| C  | -2.95137700 | -1.30162400 | -1.42112500 |
| H  | -2.12567700 | -1.27716900 | -2.13730300 |
| H  | -3.92749400 | -1.28423200 | -1.91212400 |
| H  | -2.84691300 | -0.50213700 | -0.68025700 |
| Cl | -0.74647200 | -1.75826300 | 2.68192000  |
| O  | 1.45493800  | 2.28941100  | 0.30052500  |
| Ag | 3.52233200  | 1.62961800  | 0.35742400  |
| Cl | 5.64435300  | 0.65228500  | -0.06821800 |
| H  | -0.54061900 | 3.04127700  | -1.44167800 |

### H-IM5

|   |             |             |             |
|---|-------------|-------------|-------------|
| C | -3.66419200 | -1.20109200 | -0.51608700 |
| C | -3.55865200 | -0.46434700 | 0.67419700  |
| C | -4.69789000 | 0.15652200  | 1.19661500  |
| C | -5.90067000 | 0.03254800  | 0.52507700  |
| C | -5.98214800 | -0.70339700 | -0.66345800 |
| C | -4.86467100 | -1.32736400 | -1.20033600 |
| C | -2.21542600 | -0.43234100 | 1.19402700  |
| H | -4.62223400 | 0.74438800  | 2.10847400  |
| H | -6.79055500 | 0.51752500  | 0.91683100  |

|    |             |             |             |
|----|-------------|-------------|-------------|
| H  | -6.93597500 | -0.78663100 | -1.17829000 |
| H  | -4.92756700 | -1.89523100 | -2.12444800 |
| S  | -2.09288600 | -1.92266300 | -1.00964400 |
| C  | -1.31953900 | -1.15997100 | 0.39030200  |
| C  | 0.13368100  | -1.35079600 | 0.67565300  |
| O  | 0.62156100  | -0.31629200 | 1.26668700  |
| Pd | -0.72056200 | 1.00425700  | 0.31416000  |
| O  | 0.69721700  | 2.45577100  | -0.06821500 |
| S  | 2.15369500  | 1.67541300  | -0.27901600 |
| C  | 3.06571800  | 2.93747800  | -1.26985400 |
| H  | 2.56851300  | 2.98480000  | -2.23893900 |
| H  | 2.99975100  | 3.89162800  | -0.74267600 |
| H  | 4.08831500  | 2.56198000  | -1.36043300 |
| C  | 2.95456100  | 1.93060200  | 1.37271800  |
| H  | 2.39642200  | 1.29127800  | 2.05918700  |
| H  | 3.99056400  | 1.59547000  | 1.27287500  |
| H  | 2.84673300  | 2.98886000  | 1.62243700  |
| Cl | -2.30944700 | 2.25870800  | -0.83413200 |
| O  | 0.77279500  | -2.33127100 | 0.27002500  |
| Ag | 2.88154300  | -1.65874900 | -0.00171000 |
| Cl | 4.81969300  | -0.31720000 | -0.47936000 |
| H  | -1.98501500 | -0.15107000 | 2.22083800  |

## H-IM6

|    |             |             |             |
|----|-------------|-------------|-------------|
| C  | 3.79872000  | -0.11454600 | 0.22606200  |
| C  | 3.14377900  | 0.59815000  | -0.79071500 |
| C  | 3.62685500  | 1.85628500  | -1.16387100 |
| C  | 4.74057300  | 2.36941300  | -0.51757400 |
| C  | 5.37584300  | 1.64474900  | 0.49762200  |
| C  | 4.91091500  | 0.39323900  | 0.88213500  |
| C  | 1.99671400  | -0.11582700 | -1.32040300 |
| H  | 3.11613500  | 2.41453400  | -1.94630600 |
| H  | 5.12615700  | 3.34543300  | -0.80100100 |
| H  | 6.24846400  | 2.06473400  | 0.99201800  |
| H  | 5.40638400  | -0.17170300 | 1.66755500  |
| S  | 3.02308800  | -1.71152900 | 0.51275400  |
| C  | 1.81277400  | -1.36009200 | -0.71739900 |
| C  | 0.80691400  | -2.45200100 | -1.05825100 |
| O  | -0.02433800 | -2.12837700 | -1.96634400 |
| Pd | 0.22948000  | 0.63416200  | -0.15685000 |
| O  | -1.29068500 | 1.65251300  | 0.80233600  |
| S  | -2.07894000 | 2.90914100  | 0.07011700  |
| C  | -3.46808100 | 2.14592100  | -0.91018100 |

|    |             |             |             |
|----|-------------|-------------|-------------|
| H  | -4.22558800 | 2.92670100  | -1.02304400 |
| H  | -3.03539300 | 1.85644100  | -1.86819600 |
| H  | -3.82129900 | 1.27098100  | -0.34943100 |
| C  | -3.07648800 | 3.36500400  | 1.56546000  |
| H  | -2.36440500 | 3.71001700  | 2.31598800  |
| H  | -3.77693400 | 4.15668700  | 1.29037300  |
| H  | -3.58942400 | 2.45466400  | 1.88840000  |
| Cl | -0.42928500 | 1.56802300  | -2.25310400 |
| O  | 0.89284300  | -3.48767900 | -0.39796800 |
| O  | 0.93141500  | 0.14256200  | 1.71838300  |
| S  | 0.19089500  | -0.75206100 | 2.88169600  |
| C  | -0.48072300 | -2.30588500 | 2.11757200  |
| H  | -0.78024300 | -2.93034300 | 2.96394200  |
| H  | -1.34867900 | -2.04621100 | 1.50002200  |
| H  | 0.31503100  | -2.78449900 | 1.53606700  |
| C  | -1.42846600 | 0.07294000  | 3.28870700  |
| H  | -1.18560500 | 1.10431700  | 3.54741000  |
| H  | -2.09986200 | 0.00658200  | 2.42493100  |
| H  | -1.81606300 | -0.47434500 | 4.15260700  |
| Ag | -1.87020900 | -1.47195900 | -1.04580400 |
| Cl | -3.64031500 | -0.98678400 | 0.55302700  |
| H  | 1.56770800  | 0.08047500  | -2.30141300 |

## H-TS2

|    |             |             |             |
|----|-------------|-------------|-------------|
| C  | -4.29092000 | 0.54425800  | 0.28025000  |
| C  | -3.96645600 | -0.83091000 | 0.33177400  |
| C  | -4.96955200 | -1.77270200 | 0.63565400  |
| C  | -6.25090200 | -1.33365300 | 0.88938900  |
| C  | -6.55561600 | 0.03914200  | 0.83387900  |
| C  | -5.59003100 | 0.98378500  | 0.52852500  |
| C  | -2.60350100 | -1.06859500 | 0.04078100  |
| H  | -4.71868200 | -2.83067800 | 0.67002900  |
| H  | -7.03472400 | -2.04721400 | 1.12912000  |
| H  | -7.57370700 | 0.36548100  | 1.03432900  |
| H  | -5.83679700 | 2.04143700  | 0.48369300  |
| S  | -2.89363800 | 1.54713100  | -0.14251900 |
| C  | -1.83494000 | 0.05025800  | -0.27114500 |
| C  | -1.12916600 | -0.29706100 | -1.96857300 |
| O  | -0.65887200 | -1.42816400 | -1.98637300 |
| Pd | 0.03615300  | 0.40851600  | 0.51679800  |
| O  | 1.95365500  | 0.90362300  | 1.27082000  |
| S  | 2.47091400  | 0.17033400  | 2.65144300  |
| C  | 3.51698900  | -1.26414100 | 2.08664800  |

|    |             |             |             |
|----|-------------|-------------|-------------|
| H  | 4.28457700  | -1.41626600 | 2.85058200  |
| H  | 2.84175600  | -2.11767600 | 2.01453200  |
| H  | 3.92693800  | -1.01318900 | 1.09770500  |
| C  | 3.85356800  | 1.34804700  | 3.02723400  |
| H  | 3.38731600  | 2.31531000  | 3.21926200  |
| H  | 4.39214200  | 0.98833500  | 3.90675300  |
| H  | 4.49392100  | 1.38294600  | 2.14191600  |
| Cl | 0.17620200  | -1.80083400 | 1.46886600  |
| O  | -1.27190400 | 0.66567500  | -2.67230000 |
| O  | -0.13864200 | 2.33890200  | -0.21018500 |
| S  | 0.88117900  | 2.98732800  | -1.32278100 |
| C  | 1.75090600  | 1.59903400  | -2.19605900 |
| H  | 2.50033700  | 2.06875600  | -2.83953700 |
| H  | 2.22449200  | 0.94279300  | -1.45557800 |
| H  | 0.98883800  | 1.08998100  | -2.79007300 |
| C  | 2.30681700  | 3.57832700  | -0.28313000 |
| H  | 1.91454300  | 4.38721100  | 0.33458500  |
| H  | 2.63297400  | 2.72844700  | 0.32382700  |
| H  | 3.08052300  | 3.94203000  | -0.96406400 |
| Ag | 1.46443900  | -1.73536900 | -1.06503100 |
| Cl | 3.84375000  | -1.29127300 | -1.39074000 |
| H  | -2.16767300 | -2.06298800 | -0.00683000 |

## H-IM7

|    |             |             |             |
|----|-------------|-------------|-------------|
| C  | -3.73797200 | 0.99757500  | -0.19903300 |
| C  | -3.47145300 | -0.30240000 | -0.66091300 |
| C  | -4.54045400 | -1.18232400 | -0.88065600 |
| C  | -5.83306900 | -0.75443600 | -0.63544700 |
| C  | -6.07935700 | 0.54508000  | -0.16932100 |
| C  | -5.03631000 | 1.43120400  | 0.05318600  |
| C  | -2.06158400 | -0.53949100 | -0.85422100 |
| H  | -4.34460500 | -2.19061600 | -1.24106700 |
| H  | -6.66734100 | -1.43084500 | -0.80474600 |
| H  | -7.10209000 | 0.86364900  | 0.01850300  |
| H  | -5.22534700 | 2.44040400  | 0.41144000  |
| S  | -2.23808700 | 1.95188000  | -0.00611000 |
| C  | -1.24241800 | 0.54082400  | -0.56193400 |
| Pd | 0.75192600  | 0.60481700  | -0.74502800 |
| O  | 2.92503900  | 0.48517500  | -0.76029300 |
| S  | 3.84375100  | 0.95180100  | 0.51767100  |
| C  | 4.15565600  | 2.76098300  | 0.22304700  |
| H  | 4.75461800  | 2.81244100  | -0.68701900 |
| H  | 3.18289900  | 3.24787600  | 0.09797400  |

|    |             |             |             |
|----|-------------|-------------|-------------|
| H  | 4.71706600  | 3.13093600  | 1.08493100  |
| C  | 2.73600700  | 1.03371300  | 2.00945200  |
| H  | 2.33983200  | 0.02312700  | 2.17717100  |
| H  | 3.38093000  | 1.33862700  | 2.83874300  |
| H  | 1.93657900  | 1.75423600  | 1.80986200  |
| Cl | 0.76724600  | 2.91394600  | -0.17909600 |
| O  | 0.53991300  | -1.40330900 | -1.40463600 |
| S  | 1.70434800  | -2.52566400 | -1.63658100 |
| C  | 2.75905500  | -2.57157100 | -0.10786500 |
| H  | 3.36484400  | -3.47826000 | -0.18057200 |
| H  | 3.35863200  | -1.66117300 | -0.09520400 |
| H  | 2.07204200  | -2.61644100 | 0.74890800  |
| C  | 2.88452900  | -1.73598100 | -2.83474500 |
| H  | 2.31660800  | -1.58491100 | -3.75389400 |
| H  | 3.21832100  | -0.79135900 | -2.39391400 |
| H  | 3.70311600  | -2.44295100 | -2.99354200 |
| Ag | -0.78470200 | -0.89922100 | 1.21481200  |
| Cl | 0.70793200  | -1.94811100 | 2.79674200  |
| H  | -1.66731600 | -1.43439100 | -1.33203900 |

### H-IM8

|    |             |             |             |
|----|-------------|-------------|-------------|
| C  | -4.24797900 | 0.79876800  | 0.46348900  |
| C  | -4.10073300 | -0.25488200 | -0.45726800 |
| C  | -5.25566600 | -0.86966200 | -0.95823000 |
| C  | -6.50153600 | -0.43071000 | -0.54147300 |
| C  | -6.62143600 | 0.61950400  | 0.37660800  |
| C  | -5.49255500 | 1.24400800  | 0.88949300  |
| C  | -2.71993700 | -0.54669800 | -0.76123500 |
| H  | -5.16399500 | -1.68779400 | -1.67021900 |
| H  | -7.39798400 | -0.90767500 | -0.93058700 |
| H  | -7.60755500 | 0.95052100  | 0.69345800  |
| H  | -5.57953200 | 2.05797700  | 1.60514600  |
| S  | -2.64686300 | 1.43122800  | 0.98119400  |
| C  | -1.83890900 | 0.23551200  | -0.09612300 |
| Pd | 0.12884600  | 0.20581100  | -0.15340400 |
| O  | 2.26255800  | 0.04493500  | -0.55422800 |
| S  | 3.56135200  | 0.09437800  | 0.42172200  |
| C  | 3.04362300  | 1.13327800  | 1.87188200  |
| H  | 2.94623400  | 2.15322300  | 1.49127200  |
| H  | 2.09084100  | 0.74530600  | 2.24557300  |
| H  | 3.83586200  | 1.06816800  | 2.62226100  |
| C  | 3.63932900  | -1.58098700 | 1.23576200  |
| H  | 3.58484800  | -2.31128700 | 0.41936000  |



|    |             |             |             |
|----|-------------|-------------|-------------|
| H  | 4.59830000  | -1.63403600 | 1.75793800  |
| H  | 2.78995200  | -1.68458000 | 1.91659300  |
| Cl | 0.08049400  | -1.03588000 | 1.98528100  |
| Ag | 0.66703600  | -2.69149900 | 0.14930000  |
| Cl | 1.98724300  | -3.98037100 | -1.35054200 |
| C  | 0.68601200  | 3.87340000  | -0.06708200 |
| C  | 1.03692900  | 2.92388200  | -1.03607900 |
| C  | 2.35931500  | 2.87770300  | -1.49701400 |
| C  | 3.30717900  | 3.75273600  | -0.98401000 |
| C  | 2.95205200  | 4.68150700  | -0.00508600 |
| C  | 1.63770000  | 4.74217300  | 0.45170700  |
| H  | -0.34426700 | 3.90620100  | 0.28766500  |
| H  | 2.64419600  | 2.14732200  | -2.24973000 |
| H  | 4.32980300  | 3.71505900  | -1.35236300 |
| H  | 3.69810200  | 5.36678700  | 0.39056900  |
| H  | 1.35331500  | 5.47040500  | 1.20703900  |
| C  | -0.00749500 | 2.00338200  | -1.49858700 |
| H  | -1.02703900 | 2.35955000  | -1.33726500 |
| C  | 0.14412300  | 0.84233600  | -2.24093600 |
| H  | 1.11645800  | 0.49590600  | -2.58695000 |
| H  | -0.73322000 | 0.39053100  | -2.69858600 |
| H  | -2.41585300 | -1.33284900 | -1.45002200 |

### H-TS3

|    |             |             |             |
|----|-------------|-------------|-------------|
| C  | 3.97773600  | -0.68022200 | -0.82085200 |
| C  | 3.49186000  | 0.62231500  | -0.59997900 |
| C  | 4.39923000  | 1.63674000  | -0.26034600 |
| C  | 5.74487500  | 1.33441900  | -0.15132900 |
| C  | 6.20682400  | 0.03060400  | -0.37841800 |
| C  | 5.32799300  | -0.99013600 | -0.71379300 |
| C  | 2.06978200  | 0.72448100  | -0.76509900 |
| H  | 4.03132300  | 2.64483000  | -0.07805600 |
| H  | 6.45321100  | 2.11483200  | 0.11537900  |
| H  | 7.26833800  | -0.18731800 | -0.28833900 |
| H  | 5.68444300  | -2.00289600 | -0.88359400 |
| S  | 2.64415700  | -1.80951400 | -1.21918900 |
| C  | 1.45438800  | -0.46057800 | -1.04701700 |
| C  | 0.08856000  | -0.27603500 | -2.62223300 |
| Pd | -0.39826700 | -1.08801200 | -0.50361300 |
| O  | -2.32908400 | -1.95580400 | -0.13398000 |
| S  | -3.41458700 | -1.51515500 | 1.00081400  |
| C  | -2.95706300 | 0.18240400  | 1.60699900  |
| H  | -3.71460000 | 0.46056700  | 2.34459300  |

|    |             |             |             |
|----|-------------|-------------|-------------|
| H  | -1.95691600 | 0.14304100  | 2.05091600  |
| H  | -2.97996200 | 0.85798600  | 0.74827900  |
| C  | -2.90294500 | -2.48848800 | 2.50293500  |
| H  | -1.83298400 | -2.31671000 | 2.66236300  |
| H  | -3.51805500 | -2.14703300 | 3.33965200  |
| H  | -3.10600400 | -3.53386500 | 2.26800500  |
| Cl | 0.46510600  | -1.60590100 | 1.85461600  |
| C  | -1.27428500 | -0.55409200 | -2.36407300 |
| H  | 0.38674300  | 0.75998600  | -2.75183100 |
| H  | 0.65758800  | -0.99146900 | -3.21011800 |
| C  | -2.28855300 | 0.47357800  | -2.09770600 |
| C  | -3.63948200 | 0.15084700  | -2.28825300 |
| C  | -1.96140200 | 1.74614200  | -1.60708200 |
| C  | -4.63503500 | 1.07956600  | -2.01214900 |
| H  | -3.90002500 | -0.84340100 | -2.64816200 |
| C  | -2.95830300 | 2.66750700  | -1.31531700 |
| H  | -0.92932200 | 2.01730400  | -1.38752300 |
| C  | -4.29713000 | 2.34019500  | -1.52382300 |
| H  | -5.67808800 | 0.81789100  | -2.17450200 |
| H  | -2.67604300 | 3.63106400  | -0.89844900 |
| H  | -5.07623900 | 3.06481000  | -1.29929800 |
| H  | -1.66372300 | -1.52376400 | -2.68495800 |
| Ag | 0.44471300  | 0.90234700  | 1.69191200  |
| Cl | -0.21170100 | 3.17085600  | 1.22922200  |
| H  | 1.53843400  | 1.67378700  | -0.69221500 |

## H-IM9

|    |             |             |             |
|----|-------------|-------------|-------------|
| C  | -4.78792900 | -0.76676200 | -0.49159800 |
| C  | -4.90547400 | 0.13659900  | 0.58099800  |
| C  | -6.18352500 | 0.56887600  | 0.95830000  |
| C  | -7.29167800 | 0.10420800  | 0.27153400  |
| C  | -7.14901200 | -0.79431700 | -0.79369400 |
| C  | -5.89472900 | -1.24012300 | -1.18542500 |
| C  | -3.63224700 | 0.49105000  | 1.14367800  |
| H  | -6.29314700 | 1.26757700  | 1.78520000  |
| H  | -8.28468400 | 0.43954100  | 0.56038100  |
| H  | -8.03086400 | -1.14658000 | -1.32325400 |
| H  | -5.77996800 | -1.93702600 | -2.01174900 |
| S  | -3.07670900 | -1.18972000 | -0.80413200 |
| C  | -2.57979100 | -0.11455100 | 0.54886500  |
| C  | -1.14294500 | 0.06023300  | 0.87237900  |
| Pd | 0.55652700  | -0.39910300 | -0.73375600 |
| O  | 1.61141700  | -2.22884900 | -1.10736800 |

|    |             |             |             |
|----|-------------|-------------|-------------|
| S  | 3.23957400  | -2.31055900 | -1.15369600 |
| C  | 3.85098700  | -0.85313000 | -0.17367300 |
| H  | 4.93454900  | -0.80304200 | -0.31104200 |
| H  | 3.34605100  | 0.04023600  | -0.55892500 |
| H  | 3.59312200  | -1.04524800 | 0.87175100  |
| C  | 3.68238700  | -1.71335600 | -2.85988100 |
| H  | 3.22952900  | -0.72728400 | -3.00535200 |
| H  | 4.77321200  | -1.69005600 | -2.92519200 |
| H  | 3.26479600  | -2.44831300 | -3.54920500 |
| Cl | 1.64015100  | 1.17258800  | -2.51873500 |
| C  | -0.30177600 | -1.15619800 | 0.96450900  |
| H  | -0.70766200 | 0.74469200  | 0.00499000  |
| H  | -1.00692800 | 0.76410900  | 1.70565300  |
| C  | 0.80072600  | -1.29854100 | 1.91536700  |
| C  | 1.37282100  | -2.57124400 | 2.08739700  |
| C  | 1.36405700  | -0.20481000 | 2.59446400  |
| C  | 2.48665100  | -2.74329800 | 2.89668200  |
| H  | 0.93848800  | -3.41935700 | 1.56094500  |
| C  | 2.48132400  | -0.38280000 | 3.39981600  |
| H  | 0.95355000  | 0.79950000  | 2.48060900  |
| C  | 3.04894800  | -1.64712600 | 3.55145700  |
| H  | 2.91675100  | -3.73437900 | 3.02235400  |
| H  | 2.90836600  | 0.47705200  | 3.91035100  |
| H  | 3.92055000  | -1.78116600 | 4.18795100  |
| H  | -0.78630800 | -2.09735800 | 0.68385400  |
| Ag | 1.38298100  | 2.47132400  | -0.42127600 |
| Cl | 0.84296400  | 3.29220400  | 1.75356000  |
| H  | -3.51265700 | 1.18913900  | 1.96857200  |

#### H-TS4

|   |             |             |             |
|---|-------------|-------------|-------------|
| C | -4.59577000 | -1.22997000 | -0.29152300 |
| C | -4.64154000 | 0.00065700  | 0.39235800  |
| C | -5.87326300 | 0.66017200  | 0.51086300  |
| C | -7.00632600 | 0.09184900  | -0.04300800 |
| C | -6.93530700 | -1.13367700 | -0.71891100 |
| C | -5.72929600 | -1.80752300 | -0.84971900 |
| C | -3.35789200 | 0.40141400  | 0.88466900  |
| H | -5.92516500 | 1.61147100  | 1.03626200  |
| H | -7.96355500 | 0.59934000  | 0.04634200  |
| H | -7.83707700 | -1.56445300 | -1.14732000 |
| H | -5.67204100 | -2.75861300 | -1.37306300 |
| S | -2.93962600 | -1.90527700 | -0.32244400 |
| C | -2.36156100 | -0.47967600 | 0.60990700  |

|    |             |             |             |
|----|-------------|-------------|-------------|
| C  | -0.97084400 | -0.32802700 | 1.00579400  |
| Pd | 0.55636800  | -0.29769100 | -0.72193700 |
| O  | 1.79463300  | -1.98846700 | -1.31129700 |
| S  | 3.41730700  | -1.94801400 | -1.41136500 |
| C  | 3.98021300  | -0.47949500 | -0.41261600 |
| H  | 5.05665700  | -0.37950900 | -0.57710300 |
| H  | 3.42916900  | 0.40181500  | -0.75846800 |
| H  | 3.76490200  | -0.71193700 | 0.63408000  |
| C  | 3.73068600  | -1.26315900 | -3.11513100 |
| H  | 3.18563800  | -0.31830500 | -3.20251600 |
| H  | 4.81048600  | -1.14203400 | -3.23332600 |
| H  | 3.34166900  | -2.00967000 | -3.80873800 |
| Cl | 1.48586300  | 1.40347600  | -2.40554100 |
| C  | -0.02632000 | -1.38002300 | 1.01946500  |
| H  | -0.48356800 | 0.78289200  | -0.25101800 |
| H  | -0.80873200 | 0.53128800  | 1.66627500  |
| C  | 1.17845000  | -1.40360000 | 1.86039100  |
| C  | 1.94264600  | -2.57942600 | 1.88330700  |
| C  | 1.61596100  | -0.29650800 | 2.60598600  |
| C  | 3.11705600  | -2.64967500 | 2.62234500  |
| H  | 1.61083400  | -3.43482000 | 1.29685000  |
| C  | 2.79164300  | -0.37225000 | 3.34156000  |
| H  | 1.05245800  | 0.63741100  | 2.60523800  |
| C  | 3.54759700  | -1.54393000 | 3.35236600  |
| H  | 3.69554400  | -3.57073200 | 2.63248700  |
| H  | 3.11652000  | 0.49344300  | 3.91366200  |
| H  | 4.46420800  | -1.59636800 | 3.93527100  |
| H  | -0.34674500 | -2.35523800 | 0.64124300  |
| Ag | 0.84192500  | 2.60805200  | -0.28599100 |
| Cl | -0.01042200 | 3.11941800  | 1.90267200  |
| H  | -3.17383800 | 1.32764000  | 1.42597500  |

### H-IM10

|   |            |             |             |
|---|------------|-------------|-------------|
| C | 4.80667000 | 0.37393300  | 0.24735600  |
| C | 4.66942100 | -1.00767000 | 0.48705700  |
| C | 5.79047500 | -1.83416500 | 0.32259600  |
| C | 6.99510400 | -1.27851300 | -0.06936800 |
| C | 7.10687600 | 0.09935900  | -0.30063700 |
| C | 6.01388900 | 0.93957300  | -0.14367700 |
| C | 3.34002600 | -1.36419900 | 0.87919400  |
| H | 5.70194400 | -2.90347000 | 0.50317300  |
| H | 7.86602700 | -1.91579000 | -0.19956600 |
| H | 8.06209800 | 0.51740600  | -0.60872100 |

|    |             |             |             |
|----|-------------|-------------|-------------|
| H  | 6.09778400  | 2.00850600  | -0.32270700 |
| S  | 3.26826500  | 1.24485900  | 0.51086200  |
| C  | 2.47792400  | -0.31465300 | 0.94881400  |
| C  | 1.08047900  | -0.37691900 | 1.32157000  |
| Pd | -0.12651700 | 0.21973000  | -0.51938000 |
| O  | -0.24350900 | 2.41848200  | -0.65192900 |
| S  | -1.61075500 | 3.23808200  | -0.96936200 |
| C  | -3.03590200 | 2.07785900  | -0.65538600 |
| H  | -3.94578800 | 2.62250200  | -0.92230300 |
| H  | -2.89788800 | 1.18387800  | -1.27041600 |
| H  | -3.01809200 | 1.84605000  | 0.41313600  |
| C  | -1.68045300 | 3.27004100  | -2.83015800 |
| H  | -1.59895900 | 2.23885400  | -3.18515700 |
| H  | -2.62052300 | 3.74543400  | -3.12134900 |
| H  | -0.82395800 | 3.86638700  | -3.14693000 |
| Cl | -1.16680900 | -0.27166500 | -2.73376700 |
| C  | 0.28398100  | 0.73238000  | 1.59247400  |
| H  | -0.02186400 | -1.32282000 | -0.40507800 |
| H  | 0.74774800  | -1.36523500 | 1.64299100  |
| C  | -1.02813200 | 0.73890800  | 2.24371200  |
| C  | -1.53263900 | 1.97016900  | 2.68822100  |
| C  | -1.82308900 | -0.40865000 | 2.38877900  |
| C  | -2.79433300 | 2.05398500  | 3.26568200  |
| H  | -0.92043900 | 2.86469500  | 2.57474700  |
| C  | -3.09081200 | -0.31816300 | 2.94508800  |
| H  | -1.49149700 | -1.38201500 | 2.02808100  |
| C  | -3.57981700 | 0.91010800  | 3.38834000  |
| H  | -3.16655600 | 3.01393900  | 3.61647400  |
| H  | -3.69659200 | -1.21900700 | 3.00840900  |
| H  | -4.57285600 | 0.97544200  | 3.82675200  |
| H  | 0.75114900  | 1.71567500  | 1.49896200  |
| Ag | -2.06518500 | -1.93531200 | -1.02324100 |
| Cl | -2.90189700 | -3.37013600 | 0.68597000  |
| H  | 3.02963600  | -2.38292700 | 1.09932000  |

## H-P

|   |            |             |             |
|---|------------|-------------|-------------|
| C | 3.13876200 | -0.59753800 | -0.07983600 |
| C | 2.74044400 | 0.74139100  | 0.11170700  |
| C | 3.73512300 | 1.72557100  | 0.22020500  |
| C | 5.06769000 | 1.36494700  | 0.13505900  |
| C | 5.43812800 | 0.02665500  | -0.05755600 |
| C | 4.47585300 | -0.96665200 | -0.16695300 |
| C | 1.31976300 | 0.89105700  | 0.17976400  |

|   |             |             |             |
|---|-------------|-------------|-------------|
| H | 3.44872700  | 2.76475900  | 0.37053700  |
| H | 5.83881900  | 2.12693400  | 0.21969600  |
| H | 6.49086100  | -0.23787200 | -0.12092400 |
| H | 4.75756800  | -2.00611100 | -0.31605000 |
| S | 1.72481600  | -1.68127400 | -0.18455800 |
| C | 0.62330400  | -0.27076900 | 0.03791500  |
| C | -0.79935100 | -0.51510300 | 0.04566200  |
| C | -1.73519000 | 0.44768000  | -0.05332300 |
| C | -3.17961100 | 0.26435400  | -0.01413500 |
| C | -3.78757600 | -0.95943600 | 0.30549300  |
| C | -4.00801200 | 1.35710900  | -0.30457500 |
| C | -5.16814800 | -1.08335800 | 0.31771200  |
| H | -3.17154600 | -1.81979800 | 0.55977800  |
| C | -5.39115500 | 1.23372200  | -0.29140100 |
| H | -3.54900300 | 2.31479600  | -0.54778900 |
| C | -5.97759400 | 0.01118300  | 0.01776200  |
| H | -5.62006800 | -2.04021900 | 0.56931600  |
| H | -6.01278600 | 2.09552000  | -0.52323100 |
| H | -7.06013800 | -0.08959500 | 0.03147900  |
| H | -1.10636400 | -1.55881000 | 0.12880900  |
| H | -1.40123900 | 1.47833500  | -0.19404500 |
| H | 0.83352600  | 1.84757100  | 0.35435800  |

### **Cartesian Coordinates for the Stationary Points Given in Scheme 1.**

#### **IM14**

|    |             |             |             |
|----|-------------|-------------|-------------|
| Pd | -0.33815100 | 0.72516600  | -1.02250500 |
| O  | -1.51928800 | 1.48462600  | 0.71904100  |
| O  | 0.72790700  | 2.48217800  | -0.81851900 |
| S  | -2.75844200 | 0.81618100  | 1.52074800  |
| S  | 1.99335500  | 2.56284000  | 0.21959100  |
| C  | -2.20235900 | -0.90876500 | 1.95652000  |
| H  | -2.98312800 | -1.35976000 | 2.57405600  |
| H  | -2.03215600 | -1.46344800 | 1.02968400  |
| H  | -1.27448600 | -0.79058800 | 2.52224800  |
| C  | -4.01101600 | 0.40372500  | 0.20886000  |
| H  | -3.50939900 | -0.18008300 | -0.56883200 |
| H  | -4.82176400 | -0.15044100 | 0.68854200  |
| H  | -4.36604700 | 1.36113500  | -0.17498900 |
| C  | 1.45064000  | 1.71400800  | 1.79095500  |
| H  | 0.36318200  | 1.85007700  | 1.80848700  |
| H  | 1.73069200  | 0.65338300  | 1.74971400  |
| H  | 1.94600700  | 2.23525200  | 2.61301100  |
| C  | 3.21146000  | 1.31776300  | -0.41957300 |

|    |             |             |             |
|----|-------------|-------------|-------------|
| H  | 3.52890000  | 1.67904100  | -1.39870000 |
| H  | 4.04474500  | 1.28278200  | 0.28721700  |
| H  | 2.71374800  | 0.34423000  | -0.47650600 |
| Cl | -1.45310400 | -1.41127600 | -1.53985500 |
| H  | 0.61676600  | 0.35420500  | -2.15045600 |
| Ag | 0.65465800  | -1.82430600 | -0.16933600 |
| Cl | 2.43598900  | -1.78814800 | 1.43517200  |

### TS5

|    |             |             |             |
|----|-------------|-------------|-------------|
| Pd | 0.32649200  | -0.66240300 | 0.16373400  |
| O  | 0.76500100  | 1.23410800  | 1.11379300  |
| O  | 2.55876700  | 0.22852400  | -1.09926100 |
| S  | 0.40482200  | 2.67903700  | 0.43579800  |
| S  | 3.88220800  | -0.18367400 | -0.27628600 |
| C  | -0.18023200 | 2.27763800  | -1.28305600 |
| H  | -0.05657600 | 3.18256600  | -1.88526000 |
| H  | 0.45090800  | 1.45295000  | -1.63601500 |
| H  | -1.23914700 | 2.00886200  | -1.19050900 |
| C  | 2.11566000  | 3.25196900  | -0.02148600 |
| H  | 2.54958600  | 2.44816700  | -0.62789800 |
| H  | 2.03315100  | 4.19930200  | -0.55961300 |
| H  | 2.64854700  | 3.38835200  | 0.92145200  |
| C  | 3.31976400  | -0.51517000 | 1.47599500  |
| H  | 2.85455200  | 0.41050200  | 1.82520300  |
| H  | 2.57134500  | -1.31613400 | 1.44770700  |
| H  | 4.20205200  | -0.78836100 | 2.06116300  |
| C  | 4.17526800  | -1.95308200 | -0.77967200 |
| H  | 4.46986100  | -1.93109500 | -1.82948200 |
| H  | 4.97290900  | -2.36359900 | -0.15559700 |
| H  | 3.23284800  | -2.49331800 | -0.65106300 |
| Cl | -1.03315400 | -2.64824900 | 0.03063700  |
| H  | 0.91181600  | -1.29335200 | -1.05700000 |
| Ag | -2.55483700 | -0.61000700 | -0.04499400 |
| Cl | -3.45558400 | 1.60360500  | -0.09529900 |

### IM15

|    |             |            |             |
|----|-------------|------------|-------------|
| Pd | -0.52479900 | 0.08286500 | -0.99583800 |
| O  | -0.72605500 | 2.20271900 | -0.73629900 |
| O  | -1.72929300 | 0.25220900 | 1.76078200  |
| S  | 0.57379000  | 3.05793200 | -0.20939700 |
| S  | -3.33719200 | 0.05760200 | 1.33767900  |
| C  | 2.00710100  | 2.29388000 | -1.11345100 |

|    |             |             |             |
|----|-------------|-------------|-------------|
| H  | 2.88824200  | 2.31225900  | -0.46633300 |
| H  | 1.69920000  | 1.25447100  | -1.30518900 |
| H  | 2.14659300  | 2.85631900  | -2.03708300 |
| C  | 0.90606600  | 2.38225200  | 1.49077900  |
| H  | 1.11854400  | 1.30998200  | 1.40849100  |
| H  | 1.77731100  | 2.90956200  | 1.88825300  |
| H  | 0.00969200  | 2.59044200  | 2.07737700  |
| C  | -3.50906200 | 0.94544700  | -0.29213700 |
| H  | -2.99841400 | 1.90559900  | -0.16778300 |
| H  | -2.99235100 | 0.36043700  | -1.06498500 |
| H  | -4.58450000 | 1.05724600  | -0.45475600 |
| C  | -3.41432700 | -1.72414700 | 0.82198800  |
| H  | -3.30056900 | -2.30308100 | 1.73937000  |
| H  | -4.40437500 | -1.87359300 | 0.38309500  |
| H  | -2.59868700 | -1.92636600 | 0.11342600  |
| Cl | -0.43255100 | -2.36856900 | -1.05678000 |
| H  | -1.15202500 | 0.12557100  | 0.91026600  |
| Ag | 1.58343100  | -1.36951200 | 0.17203800  |
| Cl | 3.37545500  | -0.15473200 | 1.23367200  |

### **Cartesian Coordinates for the Stationary Points Given in Figure S1.**

#### **IM16**

|    |             |             |             |
|----|-------------|-------------|-------------|
| C  | -3.02935400 | 0.01399400  | 0.77565100  |
| C  | -2.81620000 | 1.09809900  | -0.09366600 |
| C  | -3.75794600 | 1.36655600  | -1.09496100 |
| C  | -4.87483300 | 0.55656100  | -1.20546600 |
| C  | -5.07360100 | -0.51973700 | -0.32890400 |
| C  | -4.15437900 | -0.79816500 | 0.67229700  |
| C  | -1.56841100 | 1.74860700  | 0.18957200  |
| H  | -3.59840800 | 2.20405500  | -1.77019800 |
| H  | -5.61047000 | 0.75798900  | -1.98026900 |
| H  | -5.95954500 | -1.14176300 | -0.43082500 |
| H  | -4.30316600 | -1.62938300 | 1.35797900  |
| Cl | -1.04004100 | 3.12500100  | -0.79802600 |
| S  | -1.67301200 | -0.19571300 | 1.92256500  |
| C  | -0.82456200 | 1.20604200  | 1.18004600  |
| C  | 0.52251300  | 1.64841100  | 1.68435000  |
| O  | 1.47134700  | 0.76172300  | 1.66448700  |
| Pd | 1.38186200  | -0.72999400 | 0.29831200  |
| O  | 1.36513500  | 0.69617500  | -1.23693800 |
| O  | 1.47465500  | -2.15625300 | -1.17514400 |
| S  | 2.73503600  | 1.55286700  | -1.51659000 |
| S  | 0.05187300  | -2.68099800 | -1.79817600 |



|    |             |             |             |
|----|-------------|-------------|-------------|
| C  | 4.09839400  | 0.40058500  | -1.00217400 |
| H  | 5.04886900  | 0.91520000  | -1.16644300 |
| H  | 3.94081400  | 0.14239100  | 0.05063600  |
| H  | 4.00492700  | -0.48409300 | -1.63513500 |
| C  | 2.87309300  | 2.79870800  | -0.13929700 |
| H  | 2.92686700  | 2.27446000  | 0.81847300  |
| H  | 3.75943700  | 3.39783400  | -0.36350600 |
| H  | 1.96285600  | 3.40078000  | -0.17488800 |
| C  | -0.85157200 | -3.50380700 | -0.39500700 |
| H  | -0.31901000 | -4.43086700 | -0.18024600 |
| H  | -0.81824000 | -2.83920900 | 0.47515500  |
| H  | -1.86808900 | -3.69250200 | -0.75227300 |
| C  | -1.02352300 | -1.16814100 | -1.95011000 |
| H  | -0.43313400 | -0.41916800 | -2.48291100 |
| H  | -1.92237900 | -1.46237100 | -2.49949600 |
| H  | -1.26284200 | -0.81762100 | -0.94406700 |
| Cl | 1.40184000  | -2.37787500 | 1.97195300  |
| O  | 0.66326900  | 2.79810800  | 2.06261000  |

## IM17

|    |             |             |             |
|----|-------------|-------------|-------------|
| C  | 2.97053500  | 0.25075900  | -0.69053700 |
| C  | 2.42716700  | -0.09030900 | 0.55382200  |
| C  | 3.10239500  | -0.98963600 | 1.37946300  |
| C  | 4.29649400  | -1.53460700 | 0.94076000  |
| C  | 4.81777600  | -1.19654300 | -0.31286400 |
| C  | 4.15861200  | -0.30236600 | -1.14558200 |
| C  | 1.15176000  | 0.55632000  | 0.77814300  |
| H  | 2.67075400  | -1.26372200 | 2.33883400  |
| H  | 4.82867700  | -2.24238900 | 1.57031200  |
| H  | 5.75325800  | -1.64060100 | -0.64386600 |
| H  | 4.56091300  | -0.04002600 | -2.12029100 |
| Cl | 0.58088700  | 0.76002300  | 2.46643000  |
| S  | 1.95475800  | 1.43801300  | -1.58882900 |
| C  | 0.75933100  | 1.41374900  | -0.26968000 |
| C  | -0.41384400 | 2.37481700  | -0.22546500 |
| O  | -1.47995300 | 1.65127200  | -0.00722800 |
| Pd | -0.65100800 | -0.23515600 | -0.21220400 |
| O  | -2.45742400 | -1.17972900 | -0.57269200 |
| S  | -3.76698900 | -0.18266800 | -0.42441100 |
| C  | -5.05567000 | -1.51218800 | -0.47663700 |
| H  | -5.01564600 | -1.92875700 | -1.48356300 |
| H  | -4.76871800 | -2.26287200 | 0.26303900  |
| H  | -6.03004700 | -1.06492200 | -0.26852800 |

|    |             |             |             |
|----|-------------|-------------|-------------|
| C  | -3.80571600 | 0.18476200  | 1.39850300  |
| H  | -3.04398300 | 0.95136200  | 1.55635100  |
| H  | -4.80386900 | 0.55163600  | 1.65006400  |
| H  | -3.55824600 | -0.74856400 | 1.91191200  |
| Cl | 0.35875100  | -2.33577100 | -0.50006900 |
| O  | -0.32235900 | 3.56341600  | -0.39617300 |

## IM18

|    |             |             |             |
|----|-------------|-------------|-------------|
| C  | -2.99979400 | -0.87767100 | -0.73882000 |
| C  | -2.77357600 | 0.28661700  | 0.00941100  |
| C  | -3.52548900 | 1.43499300  | -0.25031400 |
| C  | -4.47621700 | 1.40316000  | -1.25428200 |
| C  | -4.68104100 | 0.23799600  | -2.00372400 |
| C  | -3.94409000 | -0.91136700 | -1.75683200 |
| C  | -1.71140400 | 0.10391700  | 0.96893900  |
| H  | -3.34488400 | 2.33700500  | 0.33004300  |
| H  | -5.06397600 | 2.29124600  | -1.47056900 |
| H  | -5.42862000 | 0.23191500  | -2.79317700 |
| H  | -4.10098600 | -1.81501300 | -2.33992400 |
| Cl | -1.70265000 | 1.16724500  | 2.41700800  |
| S  | -1.93848200 | -2.24095600 | -0.25029800 |
| C  | -1.14999700 | -1.19278700 | 0.95753200  |
| C  | -0.18461200 | -1.71714900 | 2.00539700  |
| O  | 0.83329600  | -0.89981300 | 1.99595900  |
| Pd | 0.42353400  | 0.08014600  | 0.25231900  |
| O  | 2.43140000  | 0.93259400  | 0.22014000  |
| S  | 2.65419000  | 2.54044900  | 0.42252500  |
| C  | 2.64067700  | 3.21085100  | -1.31455400 |
| H  | 3.56786200  | 2.86738200  | -1.77635300 |
| H  | 1.75854700  | 2.79536900  | -1.81500900 |
| H  | 2.62205200  | 4.30159400  | -1.24571600 |
| C  | 1.01179200  | 3.19002200  | 0.99949000  |
| H  | 0.80314300  | 2.68273300  | 1.94462700  |
| H  | 1.12435100  | 4.26816100  | 1.14424900  |
| H  | 0.26376800  | 2.93864400  | 0.23780200  |
| Cl | -0.17440000 | 1.20832600  | -1.77667600 |
| O  | -0.36712300 | -2.70589100 | 2.67086200  |
| O  | 1.19694900  | -2.04394500 | -0.81507500 |
| S  | 2.70823700  | -2.42796800 | -1.18648200 |
| C  | 3.69307700  | -2.01796500 | 0.34491100  |
| H  | 4.75239300  | -2.16326700 | 0.11610200  |
| H  | 3.45709000  | -0.98677400 | 0.62738700  |
| H  | 3.35645300  | -2.71677800 | 1.11247600  |

|   |            |             |             |
|---|------------|-------------|-------------|
| C | 3.27573300 | -0.99521800 | -2.23982500 |
| H | 2.65259800 | -1.02128000 | -3.13517600 |
| H | 3.08508300 | -0.08688700 | -1.65887800 |
| H | 4.33276400 | -1.13584000 | -2.48116600 |

## TS6

|    |             |             |             |
|----|-------------|-------------|-------------|
| C  | -3.41185800 | -0.79593700 | 0.52630600  |
| C  | -3.15017000 | 0.27680000  | -0.34812100 |
| C  | -4.01377300 | 0.51658200  | -1.42738200 |
| C  | -5.10747100 | -0.30641000 | -1.60731800 |
| C  | -5.35566900 | -1.37255600 | -0.72799800 |
| C  | -4.51258900 | -1.62695400 | 0.34109400  |
| C  | -1.98398500 | 0.98850500  | 0.06190800  |
| H  | -3.81375500 | 1.34486400  | -2.10279100 |
| H  | -5.78488700 | -0.12924600 | -2.43878500 |
| H  | -6.22082600 | -2.01088200 | -0.89062700 |
| H  | -4.69999700 | -2.45501200 | 1.02003000  |
| Cl | -1.52673900 | 2.48299900  | -0.79642300 |
| S  | -2.18761800 | -0.92545000 | 1.80826800  |
| C  | -1.30813700 | 0.49868800  | 1.14723500  |
| C  | -0.17334500 | 1.03261400  | 2.04642500  |
| O  | 0.56571100  | 0.09450200  | 2.45137900  |
| Pd | 0.86564900  | -0.32340900 | -0.04427400 |
| O  | 2.22418300  | 1.15158600  | 0.50478800  |
| O  | 2.43311200  | -0.94085000 | -1.26103100 |
| S  | 2.59444200  | 2.41742000  | -0.48001000 |
| S  | 3.53238900  | -1.91582700 | -0.50563100 |
| C  | 1.48191500  | 3.79297300  | 0.12563800  |
| H  | 1.02527700  | 4.27400700  | -0.74221400 |
| H  | 0.74610400  | 3.32472700  | 0.80075100  |
| H  | 2.12785100  | 4.48401400  | 0.66845900  |
| C  | 1.82139500  | 2.02309400  | -2.12145200 |
| H  | 0.74896200  | 1.86843100  | -1.97215900 |
| H  | 2.02581100  | 2.87208300  | -2.77901100 |
| H  | 2.30991400  | 1.11144900  | -2.47060000 |
| C  | 3.26890200  | -1.67786200 | 1.32078800  |
| H  | 3.43541300  | -0.61713900 | 1.52312600  |
| H  | 2.23494700  | -1.94574600 | 1.56661200  |
| H  | 4.00158900  | -2.31681100 | 1.82182100  |
| C  | 2.81108000  | -3.61752000 | -0.69380200 |
| H  | 2.91748200  | -3.87906700 | -1.74704000 |
| H  | 3.39874400  | -4.28533300 | -0.05856300 |
| H  | 1.75328700  | -3.56609700 | -0.41152800 |

|    |             |             |             |
|----|-------------|-------------|-------------|
| C1 | -0.35507600 | -2.20317500 | -0.74659000 |
| O  | -0.13051800 | 2.24916100  | 2.23716300  |

### IM19

|    |             |             |             |
|----|-------------|-------------|-------------|
| C  | -4.37494600 | -0.91939200 | 0.13539000  |
| C  | -4.25129600 | 0.47702700  | 0.02094700  |
| C  | -5.40500800 | 1.27347200  | 0.00735300  |
| C  | -6.64060400 | 0.66529300  | 0.11110900  |
| C  | -6.74683500 | -0.72964000 | 0.22905700  |
| C  | -5.61951800 | -1.53365000 | 0.24164900  |
| C  | -2.87743700 | 0.87084800  | -0.06641800 |
| H  | -5.31098600 | 2.35298500  | -0.08403200 |
| H  | -7.54216400 | 1.27219400  | 0.10216300  |
| H  | -7.72966100 | -1.18727200 | 0.31179600  |
| H  | -5.69988200 | -2.61384700 | 0.33168700  |
| C1 | -2.45010200 | 2.57077500  | -0.21431000 |
| S  | -2.79569700 | -1.74311600 | 0.12720000  |
| C  | -1.98121000 | -0.15195600 | -0.02741800 |
| C  | -0.52618300 | -0.14800300 | -0.09353500 |
| O  | 0.09931900  | -1.26457200 | -0.08079800 |
| Pd | 1.89544300  | -0.26823900 | -0.21460600 |
| O  | 3.25415900  | 1.23589200  | -0.39970000 |
| S  | 4.71683600  | 1.35030100  | 0.33337100  |
| C  | 4.60230000  | 0.34984800  | 1.89280200  |
| H  | 3.82433500  | 0.82615500  | 2.49232600  |
| H  | 4.33477100  | -0.67706800 | 1.61992600  |
| H  | 5.57548700  | 0.42132000  | 2.38554400  |
| C  | 5.85416200  | 0.27905000  | -0.67291500 |
| H  | 5.88238900  | 0.73597000  | -1.66307200 |
| H  | 6.83617600  | 0.32073600  | -0.19433000 |
| H  | 5.42973000  | -0.72857200 | -0.70464200 |
| C1 | 3.40327100  | -2.09063200 | -0.23386800 |
| O  | 0.15486800  | 0.92138400  | -0.16246900 |

### TS7

|   |            |             |             |
|---|------------|-------------|-------------|
| C | 3.49318000 | -1.25916300 | -0.23600700 |
| C | 4.09131400 | -0.05217500 | 0.16525700  |
| C | 5.42918000 | -0.05404600 | 0.58175000  |
| C | 6.13035800 | -1.24479100 | 0.58902000  |
| C | 5.51802900 | -2.44137200 | 0.18706500  |
| C | 4.19651000 | -2.45996700 | -0.22858400 |
| C | 3.16969400 | 1.04325700  | 0.07898500  |

|    |             |             |             |
|----|-------------|-------------|-------------|
| H  | 5.89487100  | 0.87848000  | 0.89212600  |
| H  | 7.16884400  | -1.25556700 | 0.90996700  |
| H  | 6.08744800  | -3.36758100 | 0.20163900  |
| H  | 3.71799200  | -3.38517700 | -0.54012200 |
| Cl | 3.68668200  | 2.66382900  | 0.53787300  |
| S  | 1.79584900  | -1.03053700 | -0.72907200 |
| C  | 1.92522700  | 0.72621500  | -0.36402100 |
| C  | 0.73932300  | 1.59346600  | -0.55172400 |
| O  | -0.28598700 | 0.96426000  | -1.10748300 |
| Pd | -1.79491100 | 0.07276800  | -0.18242800 |
| O  | -3.41571100 | 0.94197300  | 0.63836100  |
| S  | -4.99263400 | 0.58511100  | 0.31076500  |
| C  | -4.98898700 | -0.35028200 | -1.29056900 |
| H  | -4.58462600 | 0.33469000  | -2.03827100 |
| H  | -4.35603100 | -1.23379500 | -1.16260500 |
| H  | -6.02943000 | -0.60264700 | -1.51161900 |
| C  | -5.44734600 | -0.76617300 | 1.50217500  |
| H  | -5.34187200 | -0.32531900 | 2.49447300  |
| H  | -6.48882000 | -1.02833800 | 1.29786700  |
| H  | -4.75223300 | -1.59624400 | 1.35739200  |
| Cl | -2.46723500 | -2.09998300 | 0.41910900  |
| O  | 0.71780100  | 2.76449100  | -0.24150500 |

## TS2'

|    |             |             |             |
|----|-------------|-------------|-------------|
| C  | 3.40532000  | 0.82444000  | -0.64795000 |
| C  | 3.38607400  | -0.45687300 | -0.05183800 |
| C  | 4.53943600  | -1.26303100 | -0.07790200 |
| C  | 5.67446400  | -0.78156700 | -0.68947200 |
| C  | 5.68325900  | 0.49849700  | -1.27844800 |
| C  | 4.56186900  | 1.30609400  | -1.26245100 |
| C  | 2.11454600  | -0.71713400 | 0.50912400  |
| H  | 4.51647200  | -2.24802500 | 0.38213500  |
| H  | 6.57424600  | -1.39025500 | -0.71904100 |
| H  | 6.59200400  | 0.85753800  | -1.75603800 |
| H  | 4.57355800  | 2.29275300  | -1.71840100 |
| Cl | 1.79146700  | -2.25186100 | 1.33017100  |
| S  | 1.85418700  | 1.66918800  | -0.51717000 |
| C  | 1.16198500  | 0.28707000  | 0.43098300  |
| C  | 0.62323100  | 0.81741300  | 2.14892400  |
| O  | -0.53638200 | 0.38565200  | 2.22768400  |
| Pd | -0.77826400 | -0.18433200 | 0.20446100  |
| O  | -2.87676400 | -0.64258800 | 0.34294800  |
| S  | -3.44038000 | -2.15786800 | 0.10360500  |

|    |             |             |             |
|----|-------------|-------------|-------------|
| C  | -3.69015100 | -2.25540100 | -1.73937000 |
| H  | -4.53009900 | -1.59552200 | -1.96262000 |
| H  | -2.76155100 | -1.91097300 | -2.21103100 |
| H  | -3.93562700 | -3.29256600 | -1.98268200 |
| C  | -1.95717600 | -3.26833000 | 0.25601000  |
| H  | -1.58506600 | -3.13145700 | 1.27352200  |
| H  | -2.30726300 | -4.29210700 | 0.09726900  |
| H  | -1.21649200 | -2.94774800 | -0.48535600 |
| Cl | -0.48296600 | -0.95760000 | -2.04417500 |
| O  | 1.46120300  | 1.40158800  | 2.75095300  |
| O  | -0.92288800 | 2.49049200  | 0.02785800  |
| S  | -2.35396700 | 3.11161200  | -0.30219900 |
| C  | -3.45102700 | 2.49309500  | 1.08017900  |
| H  | -4.47457400 | 2.82302200  | 0.88230200  |
| H  | -3.36371500 | 1.40186600  | 1.11580100  |
| H  | -3.06151900 | 2.94687800  | 1.99288300  |
| C  | -3.04680200 | 2.01602400  | -1.65230600 |
| H  | -2.33983800 | 2.08495400  | -2.48089100 |
| H  | -3.08084100 | 0.99420300  | -1.26051100 |
| H  | -4.03302500 | 2.39770600  | -1.93067700 |

## IM20

|    |             |             |             |
|----|-------------|-------------|-------------|
| C  | 3.22974500  | -0.92784100 | -0.93325700 |
| C  | 3.16279900  | -0.64316600 | 0.44302100  |
| C  | 4.34501400  | -0.63686500 | 1.19233300  |
| C  | 5.54834900  | -0.91073500 | 0.56266200  |
| C  | 5.59619300  | -1.19309700 | -0.80829500 |
| C  | 4.43426000  | -1.20547300 | -1.56766300 |
| C  | 1.80765100  | -0.38372300 | 0.85177600  |
| H  | 4.30313400  | -0.42445100 | 2.25856600  |
| H  | 6.46868900  | -0.91042900 | 1.14222900  |
| H  | 6.55096800  | -1.40811000 | -1.28264200 |
| H  | 4.46114300  | -1.43011200 | -2.63157800 |
| Cl | 1.44797700  | 0.00137700  | 2.56075600  |
| S  | 1.59665100  | -0.88363400 | -1.68211100 |
| C  | 0.84451100  | -0.44857700 | -0.09676900 |
| Pd | -1.07956100 | -0.09766500 | -0.06398500 |
| O  | -0.77244300 | 1.88380600  | -0.66949700 |
| O  | -3.16508300 | 0.40924100  | -0.11732000 |
| S  | 0.41889900  | 2.65905600  | 0.14568600  |
| S  | -4.23604700 | -0.73806200 | 0.33134300  |
| C  | -0.26573700 | 4.38108200  | 0.03526000  |
| H  | 0.49231200  | 5.08710700  | 0.38182700  |

|    |             |             |             |
|----|-------------|-------------|-------------|
| H  | -0.54579400 | 4.54670600  | -1.00775900 |
| H  | -1.14582100 | 4.39673200  | 0.67866400  |
| C  | 1.74710700  | 2.82779400  | -1.14390000 |
| H  | 1.25507600  | 3.14222900  | -2.06794200 |
| H  | 2.47798100  | 3.55775500  | -0.78726100 |
| H  | 2.19247400  | 1.83676200  | -1.25906000 |
| C  | -4.36959100 | -1.81263900 | -1.18397700 |
| H  | -4.39132000 | -1.13733800 | -2.04346300 |
| H  | -3.46821300 | -2.42896500 | -1.17465900 |
| H  | -5.27763100 | -2.41512400 | -1.09992200 |
| C  | -5.78582400 | 0.25019900  | 0.06165000  |
| H  | -5.79933400 | 1.01740900  | 0.83624700  |
| H  | -5.70408500 | 0.70418900  | -0.92866300 |
| H  | -6.65027900 | -0.41225000 | 0.14681700  |
| Cl | -1.46551900 | -2.35157800 | 0.54987400  |

### Cartesian Coordinates for the Stationary Points Given in Figure S2.

#### IM21

|    |             |             |             |
|----|-------------|-------------|-------------|
| C  | 4.24498800  | -0.03507400 | -0.78487000 |
| C  | 3.62491600  | -1.27597400 | -1.00918100 |
| C  | 4.41946200  | -2.40518800 | -1.23790700 |
| C  | 5.79807000  | -2.27086500 | -1.23956300 |
| C  | 6.40048800  | -1.02623200 | -1.01731400 |
| C  | 5.62785500  | 0.10423300  | -0.78979800 |
| C  | 2.19138200  | -1.15400600 | -0.95402400 |
| H  | 3.94669400  | -3.36913600 | -1.41345800 |
| H  | 6.42134900  | -3.14340900 | -1.41927800 |
| H  | 7.48448000  | -0.94205100 | -1.02579800 |
| H  | 6.08911400  | 1.07521200  | -0.62356800 |
| Cl | 1.16590400  | -2.59240800 | -1.20055200 |
| S  | 3.03204700  | 1.26915600  | -0.53588200 |
| C  | 1.68425500  | 0.07331300  | -0.69554900 |
| C  | -0.06366400 | 0.83746500  | -2.44903700 |
| Pd | -0.13269900 | 0.70520200  | -0.19647500 |
| O  | 0.52899300  | 3.29426200  | -0.82702200 |
| O  | 0.37549700  | 0.26108300  | 1.80315900  |
| S  | 0.62074100  | 4.43671200  | 0.29203200  |
| S  | 1.10272300  | -1.19686800 | 2.08917100  |
| C  | 0.69563800  | 3.51937400  | 1.91942700  |
| H  | 0.67990600  | 4.26072300  | 2.72314800  |
| H  | -0.15555600 | 2.83288000  | 1.96535600  |
| H  | 1.63672200  | 2.96492500  | 1.91119100  |
| C  | -1.14058800 | 5.03725500  | 0.45216400  |

|    |             |             |             |
|----|-------------|-------------|-------------|
| H  | -1.77242100 | 4.14782300  | 0.54544400  |
| H  | -1.21105900 | 5.69168500  | 1.32467200  |
| H  | -1.36072200 | 5.58478900  | -0.46538600 |
| C  | 0.23100700  | -1.67190900 | 3.65679200  |
| H  | 0.05789900  | -0.74371700 | 4.20726700  |
| H  | -0.69752900 | -2.16203400 | 3.33855300  |
| H  | 0.87757400  | -2.36778600 | 4.19745800  |
| C  | 2.70696200  | -0.60823500 | 2.81341600  |
| H  | 3.25408300  | -0.13517000 | 1.99362700  |
| H  | 2.46435600  | 0.11715600  | 3.59430300  |
| H  | 3.24885700  | -1.47259200 | 3.20442300  |
| Cl | -2.31550700 | 1.56222700  | 0.84780200  |
| C  | -1.37596100 | 1.09210400  | -2.11287400 |
| H  | 0.61872200  | 1.67151200  | -2.59442000 |
| H  | 0.23239400  | -0.13236500 | -2.84408800 |
| Ag | -2.42992600 | -0.96411200 | 0.94447000  |
| Cl | -2.05654700 | -3.27164600 | 1.53241100  |
| H  | -1.65364100 | 2.13415900  | -1.94516700 |
| C  | -2.48604600 | 0.13447300  | -2.16173900 |
| C  | -2.29519400 | -1.25094200 | -2.04361300 |
| C  | -3.78951700 | 0.62962300  | -2.28046300 |
| C  | -3.38598500 | -2.11206600 | -2.03742700 |
| H  | -1.29312500 | -1.65713000 | -1.91232100 |
| C  | -4.87659000 | -0.23510400 | -2.30406700 |
| H  | -3.94253600 | 1.70593000  | -2.33909800 |
| C  | -4.67807800 | -1.60687000 | -2.17470200 |
| H  | -3.22270800 | -3.17707100 | -1.89393800 |
| H  | -5.88283100 | 0.16475000  | -2.40304100 |
| H  | -5.52932300 | -2.28303500 | -2.16462500 |

## **TSS**

|    |            |             |             |
|----|------------|-------------|-------------|
| C  | 4.04603500 | 0.22112700  | -0.86024200 |
| C  | 3.49560200 | -1.03666900 | -1.16433200 |
| C  | 4.33907600 | -2.15099800 | -1.25663900 |
| C  | 5.69866500 | -1.98529500 | -1.05053500 |
| C  | 6.23389200 | -0.72422800 | -0.75719600 |
| C  | 5.41157300 | 0.39021100  | -0.66110700 |
| C  | 2.06857200 | -0.95692300 | -1.28864300 |
| H  | 3.91741600 | -3.12786300 | -1.48316700 |
| H  | 6.36002600 | -2.84555700 | -1.11765800 |
| H  | 7.30468000 | -0.61549200 | -0.60283300 |
| H  | 5.82160200 | 1.37151100  | -0.43271500 |
| Cl | 1.13721800 | -2.40417100 | -1.73165100 |



|    |             |             |             |
|----|-------------|-------------|-------------|
| S  | 2.78537600  | 1.49008600  | -0.73890000 |
| C  | 1.48604100  | 0.25133700  | -1.04952400 |
| C  | 0.04675000  | 0.80910000  | -2.37879700 |
| Pd | -0.24344300 | 0.68667500  | -0.09955200 |
| O  | 0.39089200  | 3.30438400  | -0.68112100 |
| O  | 0.57196300  | 0.04234600  | 1.80964700  |
| S  | 0.53322000  | 4.35492500  | 0.52291200  |
| S  | 1.33027400  | -1.41569500 | 1.82705000  |
| C  | 0.77939100  | 3.31474800  | 2.05690300  |
| H  | 0.83533800  | 3.99345700  | 2.91240300  |
| H  | -0.05468800 | 2.61065800  | 2.13658100  |
| H  | 1.71995300  | 2.77923200  | 1.90980100  |
| C  | -1.22830500 | 4.86832700  | 0.86903700  |
| H  | -1.82339400 | 3.95174200  | 0.94235200  |
| H  | -1.24604800 | 5.45068400  | 1.79383000  |
| H  | -1.54012800 | 5.47708700  | 0.01907200  |
| C  | 0.62046100  | -2.15150100 | 3.37565700  |
| H  | 0.50390400  | -1.32642400 | 4.08286500  |
| H  | -0.33604300 | -2.59591600 | 3.07420000  |
| H  | 1.31363800  | -2.91773300 | 3.73179000  |
| C  | 2.99860300  | -0.92384600 | 2.48074300  |
| H  | 3.49291200  | -0.37050800 | 1.67731900  |
| H  | 2.83000600  | -0.29162900 | 3.35629400  |
| H  | 3.55684700  | -1.83105000 | 2.72534200  |
| Cl | -2.33560200 | 1.37717900  | 1.18520200  |
| C  | -1.25042000 | 1.16700400  | -1.91474300 |
| H  | 0.67971700  | 1.63468700  | -2.69634500 |
| H  | 0.14904100  | -0.12265000 | -2.93358000 |
| Ag | -2.31600400 | -1.14477300 | 0.99048100  |
| Cl | -1.81647100 | -3.48929300 | 1.22804300  |
| H  | -1.43010400 | 2.23648700  | -1.78551900 |
| C  | -2.44945600 | 0.32884000  | -2.02492700 |
| C  | -2.40866000 | -1.07464300 | -2.06747500 |
| C  | -3.69818600 | 0.96427200  | -2.01347900 |
| C  | -3.58658700 | -1.81309900 | -2.08277400 |
| H  | -1.45456400 | -1.59914600 | -2.05246500 |
| C  | -4.87235600 | 0.22573800  | -2.04912400 |
| H  | -3.73564200 | 2.05046800  | -1.95190600 |
| C  | -4.82079800 | -1.16539800 | -2.07503300 |
| H  | -3.53361700 | -2.89888200 | -2.07640300 |
| H  | -5.83237000 | 0.73623000  | -2.03958500 |
| H  | -5.73950800 | -1.74681100 | -2.08184400 |

|    |             |             |             |
|----|-------------|-------------|-------------|
| C  | -2.22959000 | -0.40453000 | 2.76041300  |
| C  | -2.76682600 | -1.17275200 | 1.71538500  |
| C  | -4.12736200 | -1.05707900 | 1.41194600  |
| C  | -4.90992100 | -0.18876700 | 2.15393500  |
| C  | -4.36063500 | 0.55979900  | 3.20236100  |
| C  | -3.01223200 | 0.45956800  | 3.51711700  |
| C  | -1.74134000 | -1.94970700 | 1.07585000  |
| H  | -4.54801700 | -1.62318600 | 0.58472200  |
| H  | -5.96330700 | -0.08052900 | 1.91021100  |
| H  | -4.99531900 | 1.23157200  | 3.77535300  |
| H  | -2.57651300 | 1.04189000  | 4.32577800  |
| Cl | -2.16291100 | -3.06505500 | -0.25557700 |
| S  | -0.46294600 | -0.64375000 | 2.91621900  |
| C  | -0.47532800 | -1.79036300 | 1.52028500  |
| C  | 0.80723700  | -2.36233300 | 1.02070800  |
| Pd | 1.34940400  | 0.34565700  | -0.08996300 |
| O  | 2.25605500  | 1.38020600  | 1.55644700  |
| O  | 0.72828400  | 2.37543000  | -1.00233800 |
| S  | 3.33538500  | 2.56598900  | 1.23387700  |
| S  | -0.87769600 | 2.18398000  | -1.23259800 |
| C  | 2.26769500  | 4.07673500  | 1.02218600  |
| H  | 2.91276600  | 4.89969200  | 0.70316500  |
| H  | 1.50342600  | 3.80833800  | 0.28214800  |
| H  | 1.84128200  | 4.27318800  | 2.00730500  |
| C  | 3.84491200  | 2.31145900  | -0.53979300 |
| H  | 2.93823100  | 2.30102100  | -1.15460100 |
| H  | 4.52457000  | 3.12792400  | -0.80022600 |
| H  | 4.35727700  | 1.34590900  | -0.56735200 |
| C  | -1.42840700 | 3.83392400  | -1.87267400 |
| H  | -1.05076000 | 4.60388900  | -1.19465600 |
| H  | -1.00629000 | 3.93948000  | -2.87245400 |
| H  | -2.52040400 | 3.79734100  | -1.90821500 |
| C  | -1.57243100 | 2.30905400  | 0.49176000  |
| H  | -1.02190500 | 1.56502200  | 1.07799500  |
| H  | -1.38274200 | 3.31916600  | 0.86619200  |
| H  | -2.63678800 | 2.05948900  | 0.42097600  |
| Cl | 0.49353900  | -0.95948400 | -2.01287000 |
| C  | 1.91849100  | -1.32798200 | 0.94473900  |
| H  | 1.13762400  | -3.17542500 | 1.69167800  |
| H  | 0.61287800  | -2.81905100 | 0.04321000  |
| Ag | -2.02298700 | -0.57198900 | -1.94246400 |
| Cl | -3.98935500 | 0.86463400  | -1.75703200 |
| H  | 2.08320100  | -0.86633500 | 1.92910300  |
| C  | 3.21448000  | -1.72172700 | 0.35648700  |

|   |            |             |             |
|---|------------|-------------|-------------|
| C | 4.39337500 | -1.19413100 | 0.91195800  |
| C | 3.32933100 | -2.56566100 | -0.75875600 |
| C | 5.63755000 | -1.48760000 | 0.36950400  |
| H | 4.30999900 | -0.54778000 | 1.78658200  |
| C | 4.57470800 | -2.86051700 | -1.29760100 |
| H | 2.43248100 | -2.96452000 | -1.22744500 |
| C | 5.73291100 | -2.32266800 | -0.74153600 |
| H | 6.53768000 | -1.07573300 | 0.82177900  |
| H | 4.64132400 | -3.51392800 | -2.16460200 |
| H | 6.70518600 | -2.55870500 | -1.16790000 |

## IM23

|    |             |             |             |
|----|-------------|-------------|-------------|
| C  | 3.78421100  | 0.39299500  | -0.83089300 |
| C  | 3.51146800  | -0.83425100 | -0.20091100 |
| C  | 4.57498600  | -1.66766300 | 0.16083200  |
| C  | 5.87247600  | -1.26627900 | -0.11310000 |
| C  | 6.12832700  | -0.04308200 | -0.74467100 |
| C  | 5.08390000  | 0.79597300  | -1.10956400 |
| C  | 2.09590500  | -1.00949300 | -0.03209200 |
| H  | 4.37110200  | -2.61916200 | 0.64778000  |
| H  | 6.70361200  | -1.91057600 | 0.16423800  |
| H  | 7.15369700  | 0.25283300  | -0.95350800 |
| H  | 5.27456400  | 1.74724800  | -1.60139000 |
| Cl | 1.46260900  | -2.47443200 | 0.80646000  |
| S  | 2.27103700  | 1.29075500  | -1.20378000 |
| C  | 1.28293100  | -0.02772900 | -0.47585400 |
| C  | -0.59366700 | -0.23876800 | -2.32425000 |
| Pd | -0.64707300 | 0.27489100  | -0.13980300 |
| O  | -0.73301100 | 2.64144800  | -1.79048000 |
| O  | 0.02202900  | 0.78562500  | 1.80718300  |
| S  | -0.97105400 | 4.03353700  | -1.04465200 |
| S  | -0.59236600 | -0.31568600 | 2.85895500  |
| C  | -0.48493500 | 3.72476400  | 0.73488500  |
| H  | -0.65557300 | 4.64833500  | 1.29519300  |
| H  | -1.07763400 | 2.88407000  | 1.10988300  |
| H  | 0.57518000  | 3.45975200  | 0.71723300  |
| C  | -2.81831000 | 4.08509500  | -0.76404200 |
| H  | -3.10245600 | 3.12560400  | -0.31424300 |
| H  | -3.04816300 | 4.93733200  | -0.11883100 |
| H  | -3.26966900 | 4.21117900  | -1.74941500 |
| C  | -1.57470400 | 0.79479700  | 3.97552200  |
| H  | -0.93641200 | 1.64859100  | 4.21795300  |
| H  | -2.43276500 | 1.09100200  | 3.36606400  |

|    |             |             |             |
|----|-------------|-------------|-------------|
| H  | -1.87232500 | 0.22837300  | 4.86137700  |
| C  | 0.90759600  | -0.57051000 | 3.92267600  |
| H  | 1.59794400  | -1.15714600 | 3.31166000  |
| H  | 1.31538000  | 0.41851400  | 4.14444700  |
| H  | 0.61226800  | -1.11412900 | 4.82328100  |
| Cl | -2.93875700 | 0.75845300  | 0.74458800  |
| C  | -1.84875600 | -0.58265200 | -1.86742000 |
| H  | -0.42239600 | 0.74869800  | -2.74661400 |
| H  | 0.16429400  | -0.99668900 | -2.50852900 |
| C  | -2.29847100 | -1.93491600 | -1.51728800 |
| C  | -3.65885100 | -2.14638000 | -1.26700300 |
| C  | -1.41928600 | -3.02298400 | -1.43744200 |
| C  | -4.13319400 | -3.41576900 | -0.96274000 |
| H  | -4.33702700 | -1.29567600 | -1.29746500 |
| C  | -1.89212400 | -4.28783800 | -1.12355000 |
| H  | -0.35340600 | -2.87391000 | -1.59986700 |
| C  | -3.25153200 | -4.48970000 | -0.89055200 |
| H  | -5.19372500 | -3.56579400 | -0.77440600 |
| H  | -1.19667000 | -5.12150500 | -1.05906500 |
| H  | -3.62115100 | -5.48366800 | -0.64839100 |
| H  | -2.63062700 | 0.17544000  | -1.92151100 |

## TS9

|    |             |             |             |
|----|-------------|-------------|-------------|
| C  | 3.60526300  | 0.39774700  | -1.04394600 |
| C  | 3.34681900  | -0.95021700 | -0.73727900 |
| C  | 4.41992700  | -1.82718300 | -0.53581300 |
| C  | 5.71396200  | -1.34610500 | -0.64436500 |
| C  | 5.95652300  | -0.00176900 | -0.95383800 |
| C  | 4.90334600  | 0.87977600  | -1.15745000 |
| C  | 1.93754500  | -1.19183600 | -0.67469100 |
| H  | 4.22441700  | -2.87156500 | -0.30147700 |
| H  | 6.55238300  | -2.02114200 | -0.48995100 |
| H  | 6.97978500  | 0.35676600  | -1.03651100 |
| H  | 5.08661900  | 1.92450300  | -1.39846400 |
| Cl | 1.32721000  | -2.82942900 | -0.28026300 |
| S  | 2.09240800  | 1.33657400  | -1.25169500 |
| C  | 1.10346800  | -0.13816800 | -0.88208600 |
| C  | -0.48142100 | -0.36570500 | -2.09462600 |
| Pd | -0.61997700 | 0.19930100  | 0.11214200  |
| O  | -0.67468000 | 2.59500200  | -1.63350200 |
| O  | 0.62558000  | 0.45567300  | 1.88779600  |
| S  | -0.87505500 | 3.94807300  | -0.80629600 |
| S  | 0.30187200  | -0.82315600 | 2.84894500  |

|    |             |             |             |
|----|-------------|-------------|-------------|
| C  | -0.17516500 | 3.61038100  | 0.89543400  |
| H  | -0.28380900 | 4.52524400  | 1.48452400  |
| H  | -0.71582900 | 2.76448200  | 1.33346300  |
| H  | 0.87684600  | 3.35732000  | 0.74223500  |
| C  | -2.68001400 | 3.91709800  | -0.32427600 |
| H  | -2.87831000 | 2.94806400  | 0.15043400  |
| H  | -2.87244500 | 4.75397400  | 0.35231300  |
| H  | -3.23959700 | 4.03265600  | -1.25408100 |
| C  | -0.54911700 | -0.01252300 | 4.28834100  |
| H  | 0.07047200  | 0.83585100  | 4.59012300  |
| H  | -1.50923100 | 0.31918600  | 3.87956700  |
| H  | -0.66949600 | -0.75098100 | 5.08473500  |
| C  | 1.98189900  | -1.08801800 | 3.59297000  |
| H  | 2.61236900  | -1.45070300 | 2.77824500  |
| H  | 2.33366500  | -0.11685900 | 3.94950400  |
| H  | 1.90487200  | -1.82540100 | 4.39528600  |
| C1 | -2.58905700 | 0.71758600  | 1.48852900  |
| C  | -1.80555300 | -0.18344000 | -1.58927300 |
| H  | -0.10212500 | 0.42930100  | -2.73178000 |
| H  | -0.17923100 | -1.37451700 | -2.37259900 |
| H  | -2.24590600 | 0.80049900  | -1.76520900 |
| C  | -2.75109400 | -1.28092400 | -1.35259300 |
| C  | -4.11076900 | -0.97142000 | -1.22137700 |
| C  | -2.35855400 | -2.62330500 | -1.26491500 |
| C  | -5.05305200 | -1.97093600 | -1.02659500 |
| H  | -4.41476700 | 0.07328100  | -1.26118600 |
| C  | -3.30143500 | -3.62199000 | -1.06541100 |
| H  | -1.30526800 | -2.88804000 | -1.33959700 |
| C  | -4.65190500 | -3.30160700 | -0.94989300 |
| H  | -6.10446200 | -1.71062700 | -0.92906500 |
| H  | -2.98047100 | -4.65939700 | -1.00148000 |
| H  | -5.38901100 | -4.08681200 | -0.79759300 |

## IM24

|   |            |             |             |
|---|------------|-------------|-------------|
| C | 3.33609800 | -0.38312700 | -1.55795400 |
| C | 3.68405800 | -1.11061400 | -0.40728400 |
| C | 4.96650500 | -0.96055600 | 0.13169300  |
| C | 5.86073700 | -0.09726200 | -0.47944900 |
| C | 5.49888600 | 0.61791700  | -1.62873700 |
| C | 4.23280000 | 0.47864300  | -2.17976700 |
| C | 2.57768600 | -1.89616000 | 0.06129400  |
| H | 5.24000200 | -1.52010100 | 1.02350500  |
| H | 6.85774600 | 0.02546500  | -0.06290600 |

|    |             |             |             |
|----|-------------|-------------|-------------|
| H  | 6.21660000  | 1.28840300  | -2.09554500 |
| H  | 3.94404900  | 1.03073900  | -3.07138600 |
| Cl | 2.75107800  | -2.91715700 | 1.50283000  |
| S  | 1.64239300  | -0.68008400 | -2.03871900 |
| C  | 1.41948500  | -1.78780500 | -0.62736600 |
| C  | 0.08541200  | -2.39010200 | -0.35085800 |
| Pd | -0.82589400 | 0.39313700  | 0.11784500  |
| O  | -1.80133000 | 1.06883100  | -1.67993800 |
| O  | -0.45538300 | 2.50864900  | 0.79578900  |
| S  | -3.19469700 | 1.89623900  | -1.49240400 |
| S  | 0.77159200  | 2.66492900  | 1.86090100  |
| C  | -2.63300600 | 3.61685000  | -1.05283100 |
| H  | -3.51464500 | 4.18446700  | -0.74314600 |
| H  | -1.87776000 | 3.52136500  | -0.26304200 |
| H  | -2.20428500 | 4.03248000  | -1.96590900 |
| C  | -3.86832300 | 1.40646300  | 0.17619300  |
| H  | -3.05337900 | 1.49721900  | 0.90524200  |
| H  | -4.70766900 | 2.07436900  | 0.39092800  |
| H  | -4.19640200 | 0.36719800  | 0.08283400  |
| C  | 1.26805800  | 4.41322700  | 1.45430800  |
| H  | 1.43437500  | 4.46137500  | 0.37554800  |
| H  | 0.42900100  | 5.04586300  | 1.74617200  |
| H  | 2.16627500  | 4.67004600  | 2.02087800  |
| C  | 2.22171200  | 1.82359400  | 1.03756400  |
| H  | 2.09632300  | 0.75741600  | 1.24156700  |
| H  | 2.15492100  | 2.04186800  | -0.03306000 |
| H  | 3.13761900  | 2.21762900  | 1.48752100  |
| Cl | -0.03181900 | -0.41955900 | 2.25728200  |
| C  | -1.07420200 | -1.46655500 | -0.69139300 |
| H  | -0.02238300 | -3.32431700 | -0.93090000 |
| H  | 0.06714500  | -2.66643600 | 0.71015900  |
| C  | -2.43188000 | -1.92045300 | -0.31143700 |
| C  | -2.73693700 | -2.38140200 | 0.97981600  |
| C  | -3.47567100 | -1.83532700 | -1.24619400 |
| C  | -4.03729700 | -2.73103900 | 1.31752800  |
| H  | -1.95074100 | -2.41113800 | 1.73253900  |
| C  | -4.77778400 | -2.18887100 | -0.90677300 |
| H  | -3.24908700 | -1.47888700 | -2.25122600 |
| C  | -5.06546900 | -2.63528000 | 0.38035400  |
| H  | -4.25378400 | -3.07573400 | 2.32657800  |
| H  | -5.56841000 | -2.12015700 | -1.65178100 |
| H  | -6.08207000 | -2.91228500 | 0.65084200  |
| H  | -1.05985900 | -1.21698500 | -1.76365400 |

**IM25**

|    |             |             |             |
|----|-------------|-------------|-------------|
| C  | 3.59506000  | 0.95219800  | -0.88904000 |
| C  | 3.81521900  | 0.05840800  | 0.17259100  |
| C  | 5.12014800  | -0.13647700 | 0.63648800  |
| C  | 6.16149800  | 0.55399900  | 0.03833400  |
| C  | 5.92364600  | 1.43911600  | -1.01985000 |
| C  | 4.63512900  | 1.64503900  | -1.49430300 |
| C  | 2.58071600  | -0.52831000 | 0.62172000  |
| H  | 5.29908600  | -0.82869800 | 1.45608300  |
| H  | 7.17794300  | 0.40522100  | 0.39495000  |
| H  | 6.75488500  | 1.96966900  | -1.47813700 |
| H  | 4.44262000  | 2.32854700  | -2.31790700 |
| Cl | 2.57527400  | -1.70527800 | 1.96755100  |
| S  | 1.85129500  | 1.03292600  | -1.31904100 |
| C  | 1.45602900  | -0.15349900 | -0.02125400 |
| Pd | -0.42637800 | -0.66830500 | 0.25136500  |
| O  | -2.45960800 | -1.24326800 | 0.72141600  |
| S  | -3.68348900 | -1.33287900 | -0.35094100 |
| C  | -3.19835700 | -0.31565700 | -1.83363600 |
| H  | -3.15802000 | 0.72445800  | -1.49806500 |
| H  | -2.22573000 | -0.67141000 | -2.19349000 |
| H  | -3.99220000 | -0.45410300 | -2.57304600 |
| C  | -3.49676100 | -3.03079900 | -1.09074300 |
| H  | -3.67589000 | -3.72929800 | -0.27246500 |
| H  | -4.25574400 | -3.13541000 | -1.87043100 |
| H  | -2.47257900 | -3.11144700 | -1.47026400 |
| Cl | -0.18312900 | -2.12449300 | -1.62740900 |
| C  | -1.83754100 | 2.75894800  | -0.17646500 |
| C  | -1.90669400 | 1.89441800  | 0.92383300  |
| C  | -3.15025000 | 1.65692300  | 1.52190900  |
| C  | -4.29636800 | 2.25788700  | 1.01734400  |
| C  | -4.21934800 | 3.10361600  | -0.08853600 |
| C  | -2.98549000 | 3.35512900  | -0.68419600 |
| H  | -0.86754900 | 2.94011100  | -0.64056100 |
| H  | -3.21709300 | 0.99469800  | 2.38164900  |
| H  | -5.25652700 | 2.07069500  | 1.49268600  |
| H  | -5.11941200 | 3.57368900  | -0.47790700 |
| H  | -2.91737300 | 4.02026800  | -1.54165500 |
| C  | -0.65946200 | 1.27170700  | 1.38651400  |
| H  | 0.24361800  | 1.81991000  | 1.11224100  |
| C  | -0.51886200 | 0.21097000  | 2.26117700  |
| H  | -1.38253400 | -0.28362600 | 2.70259000  |
| H  | 0.45150700  | -0.00144700 | 2.70558300  |

**TS10**

|    |             |             |             |
|----|-------------|-------------|-------------|
| C  | -3.95408900 | 0.12503900  | -0.63421200 |
| C  | -3.49989000 | -0.60278000 | 0.48080200  |
| C  | -4.42792100 | -1.05128600 | 1.42950200  |
| C  | -5.76930900 | -0.76839900 | 1.24537500  |
| C  | -6.20402300 | -0.04118100 | 0.12889500  |
| C  | -5.29986300 | 0.41454800  | -0.81964000 |
| C  | -2.08125800 | -0.77117300 | 0.43757600  |
| H  | -4.08293200 | -1.60856300 | 2.29747500  |
| H  | -6.49614600 | -1.11238900 | 1.97699000  |
| H  | -7.26309000 | 0.17091000  | 0.00356600  |
| H  | -5.63107400 | 0.98308300  | -1.68508300 |
| S  | -2.60212200 | 0.60039500  | -1.70630100 |
| C  | -1.41485100 | -0.21686300 | -0.61269300 |
| C  | -0.17181500 | -1.41735100 | -1.59457400 |
| Pd | 0.44026900  | 0.59778200  | -0.58073100 |
| O  | 2.40184300  | 1.43270000  | -0.77866000 |
| S  | 3.35322300  | 1.74872400  | 0.51012800  |
| C  | 2.63043600  | 0.80956900  | 1.94669600  |
| H  | 3.19345300  | 1.11260600  | 2.83406200  |
| H  | 1.56684300  | 1.07012100  | 2.01531200  |
| H  | 2.78267700  | -0.25189300 | 1.73093500  |
| C  | 2.86020500  | 3.47311500  | 1.01175600  |
| H  | 1.77284500  | 3.47338600  | 1.15138900  |
| H  | 3.41728500  | 3.72193900  | 1.91896900  |
| H  | 3.15689100  | 4.11416600  | 0.18063800  |
| Cl | -0.39858100 | 2.35899200  | 0.88836100  |
| C  | 1.19668200  | -1.03654800 | -1.69976000 |
| H  | -0.41253700 | -2.27833500 | -0.97264300 |
| H  | -0.77036400 | -1.34248000 | -2.49947900 |
| C  | 2.28875700  | -1.63681500 | -0.92376100 |
| C  | 3.61031800  | -1.33103100 | -1.28255700 |
| C  | 2.07555000  | -2.47452600 | 0.18179400  |
| C  | 4.68226400  | -1.83700500 | -0.55937900 |
| H  | 3.78325600  | -0.66719700 | -2.12726500 |
| C  | 3.14952100  | -2.98067400 | 0.90295900  |
| H  | 1.06198800  | -2.71589700 | 0.49670800  |
| C  | 4.45695700  | -2.66264100 | 0.53938700  |
| H  | 5.69866600  | -1.58598700 | -0.85428700 |
| H  | 2.96346900  | -3.62866200 | 1.75650000  |
| H  | 5.29478300  | -3.06143000 | 1.10640400  |
| H  | 1.50691300  | -0.54261100 | -2.62415200 |
| Cl | -1.23634200 | -1.67429800 | 1.71791200  |



**IM26**

|    |             |             |             |
|----|-------------|-------------|-------------|
| C  | 4.00931600  | -1.06319600 | -0.60139700 |
| C  | 4.39710900  | 0.16302400  | -0.03666100 |
| C  | 5.75318800  | 0.50571700  | -0.00752800 |
| C  | 6.68059000  | -0.37581300 | -0.53408600 |
| C  | 6.27690000  | -1.59593100 | -1.09236900 |
| C  | 4.93667500  | -1.95146400 | -1.13213200 |
| C  | 3.25643300  | 0.89133900  | 0.43787800  |
| H  | 6.05861400  | 1.45527200  | 0.42597900  |
| H  | 7.73658200  | -0.11869000 | -0.51517700 |
| H  | 7.02202400  | -2.27501900 | -1.49926900 |
| H  | 4.61784100  | -2.89717100 | -1.56307800 |
| Cl | 3.44277100  | 2.48575800  | 1.19981300  |
| S  | 2.23487900  | -1.29872000 | -0.53118100 |
| C  | 2.05381200  | 0.29971100  | 0.26443200  |
| C  | 0.70838100  | 0.80398100  | 0.62802900  |
| Pd | -1.15882200 | -0.67902700 | 0.44818900  |
| O  | -2.35684400 | -1.01559600 | -1.28622800 |
| S  | -3.95648500 | -1.31835800 | -1.16657600 |
| C  | -4.50825100 | -0.39234100 | 0.34733300  |
| H  | -5.58377800 | -0.55600500 | 0.45629800  |
| H  | -3.93300100 | -0.77446200 | 1.20095900  |
| H  | -4.28748500 | 0.65880500  | 0.14415700  |
| C  | -4.06956100 | -3.05849100 | -0.51983700 |
| H  | -3.46521400 | -3.11692100 | 0.39485900  |
| H  | -5.12819800 | -3.26688200 | -0.34269500 |
| H  | -3.67371500 | -3.69446300 | -1.31279600 |
| Cl | -2.02986200 | -2.21441700 | 2.16614000  |
| C  | -0.27350000 | 0.90633100  | -0.48522000 |
| H  | 0.27494000  | 0.07262700  | 1.44039600  |
| H  | 0.80274300  | 1.72536200  | 1.21757100  |
| C  | -1.32127000 | 1.92742200  | -0.50457900 |
| C  | -2.02900300 | 2.14975800  | -1.69808300 |
| C  | -1.71153200 | 2.63537900  | 0.64464800  |
| C  | -3.08578200 | 3.04723800  | -1.74125800 |
| H  | -1.74382000 | 1.58798600  | -2.58565300 |
| C  | -2.77011000 | 3.53300100  | 0.59817400  |
| H  | -1.19026600 | 2.47637800  | 1.58754200  |
| C  | -3.46084700 | 3.74385600  | -0.59326600 |
| H  | -3.61774900 | 3.20995200  | -2.67592100 |
| H  | -3.05582000 | 4.07423600  | 1.49707500  |
| H  | -4.28455900 | 4.45289700  | -0.62840700 |
| H  | 0.08238700  | 0.58944200  | -1.47028400 |

## Cartesian Coordinates for the Stationary Points Given in Figure S3.

### H-IM16

|    |             |             |             |
|----|-------------|-------------|-------------|
| C  | 3.38612300  | -0.12934400 | 0.43181200  |
| C  | 3.34573800  | -1.25805700 | -0.41214600 |
| C  | 4.43384900  | -1.50113500 | -1.26399600 |
| C  | 5.51415800  | -0.63685800 | -1.25811000 |
| C  | 5.53403000  | 0.47870500  | -0.40866300 |
| C  | 4.47224600  | 0.74108500  | 0.44399600  |
| C  | 2.14122200  | -2.01677100 | -0.24604900 |
| H  | 4.42032300  | -2.37121300 | -1.91767100 |
| H  | 6.36006900  | -0.82550700 | -1.91480900 |
| H  | 6.39449500  | 1.14380400  | -0.41405700 |
| H  | 4.48797800  | 1.60049400  | 1.11061100  |
| S  | 1.90735500  | 0.00666000  | 1.42571300  |
| C  | 1.27657400  | -1.49989600 | 0.66010000  |
| C  | -0.04620800 | -2.09227300 | 1.01604100  |
| O  | -0.95364600 | -1.31035000 | 1.52427400  |
| Pd | -1.36080100 | 0.35277800  | 0.44538200  |
| O  | -1.44488800 | -0.87543300 | -1.24346500 |
| O  | -1.90598600 | 1.91231100  | -0.78518500 |
| S  | -2.82988700 | -1.72201300 | -1.48296300 |
| S  | -0.67778200 | 2.72853000  | -1.50593000 |
| C  | -4.17015600 | -0.45291800 | -1.27122100 |
| H  | -5.12861000 | -0.97074200 | -1.36030800 |
| H  | -4.04018100 | 0.01385500  | -0.28907400 |
| H  | -4.03409800 | 0.28446400  | -2.06286400 |
| C  | -3.14991400 | -2.72758200 | 0.05101000  |
| H  | -3.31402000 | -2.05103400 | 0.89230700  |
| H  | -4.02259100 | -3.34297000 | -0.18424800 |
| H  | -2.24316400 | -3.31714100 | 0.23496600  |
| C  | 0.18116200  | 3.64989100  | -0.13898800 |
| H  | -0.47620100 | 4.47473100  | 0.13769000  |
| H  | 0.30688300  | 2.96600700  | 0.70831200  |
| H  | 1.12608800  | 4.01263800  | -0.55275000 |
| C  | 0.63683100  | 1.45579000  | -1.86329200 |
| H  | 0.12268700  | 0.61711000  | -2.33987800 |
| H  | 1.36053000  | 1.92704800  | -2.53328700 |
| H  | 1.09143900  | 1.14536100  | -0.91620800 |
| Cl | -1.25657000 | 1.74434100  | 2.33908300  |
| O  | -0.20690100 | -3.29256400 | 0.81626600  |
| H  | 1.90936700  | -2.93487000 | -0.77790000 |

## H-IM17

|    |             |             |             |
|----|-------------|-------------|-------------|
| C  | 3.00105400  | 0.46217900  | -0.54603800 |
| C  | 2.56306900  | -0.00194700 | 0.70270600  |
| C  | 3.35011600  | -0.92056700 | 1.40225800  |
| C  | 4.54274700  | -1.35116700 | 0.84713300  |
| C  | 4.95752700  | -0.87997800 | -0.40357400 |
| C  | 4.18872200  | 0.02883000  | -1.11811200 |
| C  | 1.28639200  | 0.55417500  | 1.08923200  |
| H  | 3.00546700  | -1.30362400 | 2.36020500  |
| H  | 5.15813000  | -2.07041600 | 1.38088600  |
| H  | 5.89506400  | -1.23282100 | -0.82632600 |
| H  | 4.50870600  | 0.39207000  | -2.09117300 |
| S  | 1.85484100  | 1.64594200  | -1.26865100 |
| C  | 0.77929700  | 1.45141000  | 0.13310000  |
| C  | -0.43944800 | 2.32798400  | 0.32340300  |
| O  | -1.43451700 | 1.54508600  | 0.65860000  |
| Pd | -0.58732300 | -0.28232500 | 0.21457200  |
| O  | -2.42118600 | -1.21618400 | -0.09767000 |
| S  | -3.59253200 | -0.14741400 | -0.54233500 |
| C  | -4.89648100 | -1.39208300 | -0.96806500 |
| H  | -4.55050800 | -1.89600400 | -1.87097800 |
| H  | -4.94960500 | -2.09237600 | -0.13132800 |
| H  | -5.83994200 | -0.86900400 | -1.13886100 |
| C  | -4.26703600 | 0.43342300  | 1.08799200  |
| H  | -3.52290900 | 1.13661200  | 1.46701500  |
| H  | -5.22792400 | 0.92069100  | 0.90488100  |
| H  | -4.35990700 | -0.44989600 | 1.72500300  |
| Cl | 0.45937800  | -2.30276800 | -0.34344400 |
| O  | -0.44809800 | 3.52289300  | 0.15736700  |
| H  | 0.92856300  | 0.53441900  | 2.11808200  |

## H-IM18

|   |            |             |             |
|---|------------|-------------|-------------|
| C | 3.22424600 | -0.66136500 | 0.49638500  |
| C | 2.94790200 | 0.24286500  | -0.54202900 |
| C | 3.77029000 | 1.36056300  | -0.71646100 |
| C | 4.83533600 | 1.55887700  | 0.14400200  |
| C | 5.08661700 | 0.65384500  | 1.18274700  |
| C | 4.28375300 | -0.46233600 | 1.37205500  |
| C | 1.78448700 | -0.13311000 | -1.30306300 |
| H | 3.55584700 | 2.06799900  | -1.51502700 |
| H | 5.47786600 | 2.42678100  | 0.02087900  |
| H | 5.92347800 | 0.82779600  | 1.85497400  |
| H | 4.47767700 | -1.16139800 | 2.18141000  |

|    |             |             |             |
|----|-------------|-------------|-------------|
| S  | 2.05548500  | -2.02233900 | 0.55067300  |
| C  | 1.19258100  | -1.32237600 | -0.83405700 |
| C  | 0.08327600  | -2.03531200 | -1.57162600 |
| O  | -0.80665100 | -1.12710400 | -1.88032400 |
| Pd | -0.28170000 | 0.25627500  | -0.47692300 |
| O  | -2.32636300 | 0.94509700  | -0.44225400 |
| S  | -2.80539000 | 2.50628800  | -0.44979100 |
| C  | -2.63474900 | 3.05240100  | 1.32170700  |
| H  | -3.44969600 | 2.57092300  | 1.86457800  |
| H  | -1.65083800 | 2.71629600  | 1.67058700  |
| H  | -2.74568400 | 4.13977300  | 1.34187500  |
| C  | -1.39248000 | 3.44700800  | -1.20435000 |
| H  | -1.27882600 | 3.04263800  | -2.21215900 |
| H  | -1.68197100 | 4.50079000  | -1.23296900 |
| H  | -0.50191200 | 3.26441200  | -0.59126000 |
| Cl | 0.55905500  | 1.78710200  | 1.16478800  |
| O  | 0.04963400  | -3.22258400 | -1.79914700 |
| O  | -1.01084800 | -1.72852000 | 1.09882800  |
| S  | -2.45734100 | -2.39783500 | 1.24061900  |
| C  | -3.24688000 | -2.30870600 | -0.45185400 |
| H  | -4.26218600 | -2.70370000 | -0.35682600 |
| H  | -3.22201000 | -1.26756900 | -0.78420800 |
| H  | -2.63353800 | -2.93123500 | -1.10629600 |
| C  | -3.46534300 | -1.03537500 | 2.02647700  |
| H  | -3.07903300 | -0.91840300 | 3.03995400  |
| H  | -3.26853800 | -0.14498900 | 1.42105800  |
| H  | -4.52004900 | -1.32283300 | 2.03172400  |
| H  | 1.56921000  | 0.26850900  | -2.29167200 |

## H-TS6

|   |             |             |             |
|---|-------------|-------------|-------------|
| C | -3.41338600 | -0.54195900 | 0.36585000  |
| C | -2.87059400 | 0.39786000  | -0.53131900 |
| C | -3.46613400 | 0.55779800  | -1.78946300 |
| C | -4.57165100 | -0.20472000 | -2.12323600 |
| C | -5.09707900 | -1.13278300 | -1.21452200 |
| C | -4.52313600 | -1.30986200 | 0.03659600  |
| C | -1.74326000 | 1.08701000  | 0.02594400  |
| H | -3.05442700 | 1.27971300  | -2.49416200 |
| H | -5.03752200 | -0.08507300 | -3.09844600 |
| H | -5.96461000 | -1.72628800 | -1.49340000 |
| H | -4.92671700 | -2.03386600 | 0.73989600  |
| S | -2.48840100 | -0.59590200 | 1.89528500  |
| C | -1.39220900 | 0.67004300  | 1.28674100  |

|    |             |             |             |
|----|-------------|-------------|-------------|
| C  | -0.23511300 | 1.16936300  | 2.15084100  |
| O  | 0.57955800  | 0.24372000  | 2.43256100  |
| Pd | 0.73635400  | -0.22751800 | 0.02177600  |
| O  | 1.91201700  | 1.46303900  | 0.22822300  |
| O  | 2.23098000  | -0.82057800 | -1.32662200 |
| S  | 1.90769100  | 2.70609300  | -0.84324900 |
| S  | 3.52636200  | -1.57262100 | -0.63586500 |
| C  | 0.53645300  | 3.83402600  | -0.24678400 |
| H  | -0.26292400 | 3.85705600  | -0.99149400 |
| H  | 0.20823600  | 3.41530200  | 0.72319500  |
| H  | 0.98067300  | 4.82270700  | -0.12173800 |
| C  | 1.15560500  | 2.00793500  | -2.39036000 |
| H  | 0.17286100  | 1.59240500  | -2.14517000 |
| H  | 1.09519200  | 2.82077100  | -3.11846700 |
| H  | 1.82747400  | 1.21180200  | -2.71760900 |
| C  | 3.46328600  | -1.14341700 | 1.17322200  |
| H  | 3.53767800  | -0.05576200 | 1.24114800  |
| H  | 2.50368300  | -1.48055500 | 1.58214000  |
| H  | 4.31750600  | -1.64227600 | 1.63988700  |
| C  | 2.99546500  | -3.34942600 | -0.52778200 |
| H  | 3.01675600  | -3.73848100 | -1.54623700 |
| H  | 3.72004000  | -3.86462600 | 0.10801100  |
| H  | 1.97572000  | -3.36193700 | -0.12472200 |
| Cl | -0.29846900 | -2.32126500 | -0.14968200 |
| O  | -0.19669800 | 2.37887800  | 2.39785700  |
| H  | -1.27466100 | 1.94363100  | -0.44919700 |

### H-IM19

|   |            |             |             |
|---|------------|-------------|-------------|
| C | 4.62660400 | 0.50025900  | 0.09575600  |
| C | 4.35958200 | -0.87848200 | -0.03560000 |
| C | 5.43761300 | -1.77662000 | -0.09008600 |
| C | 6.72928900 | -1.29313500 | -0.01518400 |
| C | 6.97212700 | 0.08326400  | 0.11464000  |
| C | 5.92702500 | 0.99116800  | 0.17189300  |
| C | 2.95931300 | -1.15633200 | -0.09870800 |
| H | 5.24481400 | -2.84265700 | -0.19133800 |
| H | 7.56841800 | -1.98289300 | -0.05722700 |
| H | 7.99628000 | 0.44424500  | 0.17069500  |
| H | 6.11498500 | 2.05726700  | 0.27194600  |
| S | 3.12970000 | 1.46901700  | 0.14405600  |
| C | 2.18640200 | -0.04227100 | -0.01968000 |
| C | 0.73529700 | 0.00735800  | -0.06311400 |
| O | 0.11610000 | 1.12334800  | 0.01322700  |

|    |             |             |             |
|----|-------------|-------------|-------------|
| Pd | -1.68476800 | 0.15314200  | -0.16910600 |
| O  | -3.05429800 | -1.32974900 | -0.43630400 |
| S  | -4.57364500 | -1.42229000 | 0.17465800  |
| C  | -4.54148800 | -0.51424600 | 1.79390100  |
| H  | -3.81764400 | -1.04660600 | 2.41368300  |
| H  | -4.23136400 | 0.51838500  | 1.60174400  |
| H  | -5.54676800 | -0.58692300 | 2.21707000  |
| C  | -5.59096300 | -0.25744900 | -0.85611800 |
| H  | -5.57302300 | -0.67336100 | -1.86440700 |
| H  | -6.60390300 | -0.27101500 | -0.44515400 |
| H  | -5.11932900 | 0.72976700  | -0.81508700 |
| Cl | -3.15382700 | 2.00766900  | -0.09199500 |
| O  | 0.04474200  | -1.05636000 | -0.18210200 |
| H  | 2.52788900  | -2.14774400 | -0.20331700 |

### H-TS7

|    |             |             |             |
|----|-------------|-------------|-------------|
| C  | 3.89519700  | -0.71131200 | -0.22192800 |
| C  | 4.33056800  | 0.49888500  | 0.35754500  |
| C  | 5.64217700  | 0.57863500  | 0.85004500  |
| C  | 6.47328900  | -0.52205500 | 0.75836900  |
| C  | 6.01846600  | -1.71633700 | 0.17983600  |
| C  | 4.72826600  | -1.82220900 | -0.31557800 |
| C  | 3.30940700  | 1.50185100  | 0.35913900  |
| H  | 5.99174300  | 1.50623300  | 1.29899100  |
| H  | 7.49028700  | -0.46443600 | 1.13865100  |
| H  | 6.68630000  | -2.57248500 | 0.11970100  |
| H  | 4.37316700  | -2.74755200 | -0.76247800 |
| S  | 2.20460700  | -0.60180500 | -0.78306600 |
| C  | 2.14201500  | 1.09183800  | -0.19342400 |
| C  | 0.91221400  | 1.90547900  | -0.29716400 |
| O  | -0.07265500 | 1.31690100  | -0.95646200 |
| Pd | -1.52233500 | 0.19910600  | -0.19413500 |
| O  | -3.20812300 | 0.88669100  | 0.66819000  |
| S  | -4.75437000 | 0.36892700  | 0.42097600  |
| C  | -4.76640100 | -0.43651600 | -1.25023900 |
| H  | -4.48000600 | 0.34418500  | -1.95744700 |
| H  | -4.04390000 | -1.25876700 | -1.23554100 |
| H  | -5.79029500 | -0.77345200 | -1.43134100 |
| C  | -4.97087000 | -1.10331600 | 1.53494800  |
| H  | -4.86543800 | -0.71520600 | 2.54902200  |
| H  | -5.98210300 | -1.48164000 | 1.36348700  |
| H  | -4.18860400 | -1.82964400 | 1.29718600  |
| Cl | -2.03293100 | -2.07862500 | 0.11195400  |

|   |            |            |            |
|---|------------|------------|------------|
| O | 0.84147400 | 3.02183300 | 0.17659900 |
| H | 3.42074700 | 2.50348900 | 0.76432300 |

### H-TS2'

|    |             |             |             |
|----|-------------|-------------|-------------|
| C  | 3.60459200  | 0.26079000  | -0.60306500 |
| C  | 3.46746800  | -0.78632000 | 0.33974200  |
| C  | 4.58077700  | -1.59170600 | 0.65015100  |
| C  | 5.78409000  | -1.34930600 | 0.02580100  |
| C  | 5.90387300  | -0.30267500 | -0.90865200 |
| C  | 4.82836400  | 0.50661800  | -1.22664200 |
| C  | 2.15350600  | -0.85327500 | 0.86355600  |
| H  | 4.47718600  | -2.39410500 | 1.37786700  |
| H  | 6.65086500  | -1.96357600 | 0.25566800  |
| H  | 6.86376100  | -0.12690100 | -1.38918800 |
| H  | 4.93009500  | 1.31449900  | -1.94676400 |
| S  | 2.09564300  | 1.15857000  | -0.84277500 |
| C  | 1.28723500  | 0.12526800  | 0.39805800  |
| C  | 0.77628200  | 1.09978200  | 1.94320500  |
| O  | -0.34059900 | 0.62137700  | 2.19223900  |
| Pd | -0.67232200 | -0.27087400 | 0.30262400  |
| O  | -2.79617300 | -0.55340100 | 0.56465700  |
| S  | -3.50679200 | -2.02302300 | 0.52648500  |
| C  | -3.88641200 | -2.29003200 | -1.27679000 |
| H  | -4.65936700 | -1.56240700 | -1.52945000 |
| H  | -2.95977500 | -2.11117400 | -1.83318900 |
| H  | -4.26278300 | -3.31038800 | -1.38716000 |
| C  | -2.13109400 | -3.26124500 | 0.71304900  |
| H  | -1.70663400 | -3.09067000 | 1.70432600  |
| H  | -2.58665000 | -4.25318700 | 0.64539100  |
| H  | -1.39501800 | -3.07163800 | -0.07794400 |
| Cl | -0.53969000 | -1.38641600 | -1.81577600 |
| O  | 1.58609000  | 1.87923600  | 2.31484300  |
| O  | -0.58675400 | 2.35359100  | -0.30794700 |
| S  | -1.98868900 | 3.02955000  | -0.65718100 |
| C  | -3.05212000 | 2.69082800  | 0.84416000  |
| H  | -4.06419200 | 3.04921100  | 0.63682400  |
| H  | -3.02305800 | 1.61446000  | 1.04522100  |
| H  | -2.59708800 | 3.25394500  | 1.66064800  |
| C  | -2.82410300 | 1.81742600  | -1.81302300 |
| H  | -2.17180300 | 1.74149100  | -2.68462300 |
| H  | -2.88471500 | 0.85549600  | -1.29370900 |
| H  | -3.80557000 | 2.21966500  | -2.07907500 |
| H  | 1.83846100  | -1.58032200 | 1.61052300  |

### H-IM20

|    |             |             |             |
|----|-------------|-------------|-------------|
| C  | -3.33839400 | -0.91738900 | 0.63942400  |
| C  | -3.19511400 | -0.68959400 | -0.74492000 |
| C  | -4.34891200 | -0.68774200 | -1.54185100 |
| C  | -5.58802900 | -0.90688300 | -0.96251000 |
| C  | -5.70572200 | -1.13108500 | 0.41530000  |
| C  | -4.57892400 | -1.14055700 | 1.22635800  |
| C  | -1.82531600 | -0.46587500 | -1.13375600 |
| H  | -4.26002200 | -0.52062400 | -2.61423400 |
| H  | -6.48089300 | -0.90775200 | -1.58405400 |
| H  | -6.68608600 | -1.30234800 | 0.85424900  |
| H  | -4.66196500 | -1.31980000 | 2.29619600  |
| S  | -1.74291700 | -0.87863100 | 1.46023700  |
| C  | -0.92907800 | -0.51515400 | -0.11392000 |
| Pd | 0.97948100  | -0.11623500 | -0.08056400 |
| O  | 0.55502700  | 1.85042800  | 0.51695300  |
| O  | 3.05883500  | 0.47567800  | 0.02809700  |
| S  | -0.56956600 | 2.60719500  | -0.40357800 |
| S  | 4.17734000  | -0.64308900 | -0.36380000 |
| C  | 0.03009000  | 4.34709600  | -0.14564600 |
| H  | -0.69726000 | 5.04255400  | -0.57055700 |
| H  | 0.15742900  | 4.48269400  | 0.93097400  |
| H  | 0.99047600  | 4.41262500  | -0.65757200 |
| C  | -2.05711000 | 2.68837000  | 0.71416000  |
| H  | -1.66777800 | 2.83084300  | 1.72588500  |
| H  | -2.68326400 | 3.52065100  | 0.38240100  |
| H  | -2.57961400 | 1.73330000  | 0.62565800  |
| C  | 4.27154200  | -1.70823400 | 1.16094900  |
| H  | 4.25326700  | -1.02950400 | 2.01781200  |
| H  | 3.38007400  | -2.33758400 | 1.12274200  |
| H  | 5.18988500  | -2.29896200 | 1.11264300  |
| C  | 5.69235600  | 0.38051600  | -0.03106500 |
| H  | 5.72281200  | 1.14564700  | -0.80730100 |
| H  | 5.55861100  | 0.83602000  | 0.95292800  |
| H  | 6.57477500  | -0.26206700 | -0.07603900 |
| Cl | 1.47312200  | -2.34648700 | -0.71669500 |
| H  | -1.52259900 | -0.28584300 | -2.16327700 |

### Cartesian Coordinates for the Stationary Points Given in Figure S4.

### H-IM21

|   |             |             |            |
|---|-------------|-------------|------------|
| C | -3.43488600 | -1.95715600 | 0.22438400 |
|---|-------------|-------------|------------|



|    |             |             |             |
|----|-------------|-------------|-------------|
| C  | -3.34529000 | -0.61720000 | 0.64581200  |
| C  | -4.46317600 | -0.02404600 | 1.24843700  |
| C  | -5.61893000 | -0.76680000 | 1.42446900  |
| C  | -5.68242000 | -2.10302900 | 1.00770400  |
| C  | -4.58989100 | -2.71011900 | 0.40377100  |
| C  | -2.06439200 | -0.02781200 | 0.35574100  |
| H  | -4.41218300 | 1.01789500  | 1.56048600  |
| H  | -6.48896200 | -0.30847200 | 1.88926800  |
| H  | -6.59879600 | -2.67037700 | 1.15349400  |
| H  | -4.63657900 | -3.74520200 | 0.07313200  |
| S  | -1.90461700 | -2.50658000 | -0.53491100 |
| C  | -1.19773500 | -0.86723000 | -0.25825500 |
| C  | -0.04457700 | -0.35579600 | -2.84124500 |
| Pd | 0.64001800  | -0.43722400 | -0.81114100 |
| O  | 1.11773200  | -2.78415200 | -0.32728200 |
| O  | 1.37782900  | -0.30453200 | 1.28467300  |
| S  | 2.55985400  | -3.50007400 | -0.37079900 |
| S  | 0.27395300  | -0.22217200 | 2.49900500  |
| C  | 3.69983700  | -2.43482200 | 0.65390200  |
| H  | 4.71261400  | -2.82633600 | 0.52435200  |
| H  | 3.59967500  | -1.39767800 | 0.32087500  |
| H  | 3.36588400  | -2.54574900 | 1.68668500  |
| C  | 3.23793400  | -3.07969000 | -2.05625900 |
| H  | 3.23956000  | -1.99029100 | -2.16191700 |
| H  | 4.24217500  | -3.50362100 | -2.13617100 |
| H  | 2.55772500  | -3.54982600 | -2.76859600 |
| C  | 1.38574300  | 0.31183900  | 3.88236900  |
| H  | 2.31579000  | -0.25339600 | 3.77561400  |
| H  | 1.53294300  | 1.38554500  | 3.72385000  |
| H  | 0.87844500  | 0.10817300  | 4.82879900  |
| C  | 0.10551100  | -2.03192900 | 2.90030400  |
| H  | -0.08978400 | -2.52117000 | 1.94025100  |
| H  | 1.05515000  | -2.37509300 | 3.31934500  |
| H  | -0.72121900 | -2.15845300 | 3.60300500  |
| Cl | 3.01629400  | 0.45349900  | -1.40418900 |
| C  | -0.08186600 | 0.97637600  | -2.42224400 |
| H  | 0.82564100  | -0.71493700 | -3.39018900 |
| H  | -0.95915700 | -0.93532200 | -2.96047000 |
| Ag | 2.08254800  | 2.02341000  | 0.37960200  |
| Cl | 0.83337800  | 3.29518900  | 2.02083200  |
| H  | -1.81966000 | 1.01037200  | 0.58400000  |
| H  | 0.83791600  | 1.55309700  | -2.53851700 |
| C  | -1.26047100 | 1.77541300  | -2.08098300 |
| C  | -1.06592500 | 2.96000400  | -1.35912900 |

|   |             |            |             |
|---|-------------|------------|-------------|
| C | -2.56495800 | 1.39050400 | -2.41405600 |
| C | -2.14794800 | 3.72341800 | -0.94311600 |
| H | -0.05412100 | 3.25722600 | -1.07764800 |
| C | -3.64591100 | 2.16686900 | -2.01976800 |
| H | -2.73441200 | 0.47125000 | -2.97293000 |
| C | -3.44106300 | 3.32807700 | -1.27592400 |
| H | -1.97525300 | 4.61930400 | -0.35233900 |
| H | -4.65520400 | 1.86018700 | -2.28424100 |
| H | -4.29224500 | 3.92666700 | -0.95924400 |

## H-TS8

|    |             |             |             |
|----|-------------|-------------|-------------|
| C  | 3.95331500  | 0.03317300  | -1.20454500 |
| C  | 3.28670000  | -1.20274400 | -1.32921600 |
| C  | 4.04559800  | -2.38192900 | -1.34503300 |
| C  | 5.42473700  | -2.30857700 | -1.24261300 |
| C  | 6.06978700  | -1.06936600 | -1.13305500 |
| C  | 5.33934300  | 0.11191600  | -1.11653200 |
| C  | 1.85846500  | -1.06242300 | -1.35752800 |
| H  | 3.54231800  | -3.34347700 | -1.42984800 |
| H  | 6.01558100  | -3.22150000 | -1.24923500 |
| H  | 7.15390700  | -1.02960400 | -1.05897800 |
| H  | 5.83675800  | 1.07497500  | -1.02484500 |
| S  | 2.78995500  | 1.39482100  | -1.10507600 |
| C  | 1.41384600  | 0.21539000  | -1.20052400 |
| C  | -0.10916800 | 0.86305200  | -2.45165100 |
| Pd | -0.24409500 | 0.69202000  | -0.15432000 |
| O  | 0.19404500  | 3.32262600  | -0.69581700 |
| O  | 0.77374100  | 0.14644100  | 1.69990600  |
| S  | 0.37408700  | 4.32635100  | 0.54173400  |
| S  | 1.50696300  | -1.32181200 | 1.73638500  |
| C  | 0.76056500  | 3.24287000  | 2.01477700  |
| H  | 0.88369200  | 3.89865400  | 2.88127000  |
| H  | -0.05354100 | 2.52353500  | 2.14880000  |
| H  | 1.68799900  | 2.71849900  | 1.77442300  |
| C  | -1.38009900 | 4.74916800  | 1.02319000  |
| H  | -1.92941800 | 3.80462300  | 1.10030300  |
| H  | -1.35969800 | 5.29556200  | 1.96970100  |
| H  | -1.77505200 | 5.37378600  | 0.22074500  |
| C  | 0.92865200  | -1.95061400 | 3.38241200  |
| H  | 0.90708500  | -1.09178600 | 4.05753100  |
| H  | -0.06224800 | -2.37455300 | 3.20115700  |
| H  | 1.62386400  | -2.72776800 | 3.70929500  |
| C  | 3.23313100  | -0.83129400 | 2.22346300  |

|    |             |             |             |
|----|-------------|-------------|-------------|
| H  | 3.65598800  | -0.30564100 | 1.36279400  |
| H  | 3.15688300  | -0.17615800 | 3.09500100  |
| H  | 3.80232000  | -1.74038200 | 2.43425400  |
| Cl | -2.32757100 | 1.17794400  | 1.25335600  |
| C  | -1.39917900 | 1.07580700  | -1.90249000 |
| H  | 0.46494400  | 1.74420700  | -2.72578500 |
| H  | 0.04589100  | -0.01358600 | -3.07503700 |
| Ag | -2.07302900 | -1.32534600 | 0.94078300  |
| Cl | -1.15180500 | -3.56060700 | 0.98859800  |
| H  | 1.18157400  | -1.91336600 | -1.42539400 |
| H  | -1.68785700 | 2.11332200  | -1.72006500 |
| C  | -2.49447200 | 0.09992400  | -1.99008700 |
| C  | -3.81474000 | 0.55637800  | -1.90046000 |
| C  | -2.26773300 | -1.28136500 | -2.09975200 |
| C  | -4.87864400 | -0.33547800 | -1.93552400 |
| H  | -3.99534100 | 1.62325400  | -1.78223400 |
| C  | -3.33157600 | -2.17547000 | -2.11359800 |
| H  | -1.25081500 | -1.66957900 | -2.13980700 |
| C  | -4.64055800 | -1.70376100 | -2.03556400 |
| H  | -5.89781800 | 0.03741500  | -1.86828400 |
| H  | -3.13097100 | -3.24293000 | -2.15894000 |
| H  | -5.47210600 | -2.40410000 | -2.04357300 |

## H-IM22

|    |             |             |             |
|----|-------------|-------------|-------------|
| C  | -2.38930600 | -1.06316400 | 2.55228000  |
| C  | -2.79450300 | -1.67636500 | 1.35302600  |
| C  | -4.14658900 | -1.61411400 | 0.99199200  |
| C  | -5.04322100 | -0.95481700 | 1.81553100  |
| C  | -4.61684700 | -0.35436400 | 3.00655100  |
| C  | -3.28248000 | -0.40249400 | 3.38817300  |
| C  | -1.69112500 | -2.25939100 | 0.63417400  |
| H  | -4.47717800 | -2.05057700 | 0.05192600  |
| H  | -6.08882200 | -0.89236300 | 1.52552100  |
| H  | -5.33708300 | 0.15749600  | 3.64065300  |
| H  | -2.94393100 | 0.06111100  | 4.31201700  |
| S  | -0.62191700 | -1.21299600 | 2.79188400  |
| C  | -0.48296800 | -2.10050500 | 1.22630400  |
| C  | 0.85771300  | -2.54052100 | 0.74454400  |
| Pd | 1.24680400  | 0.29451100  | -0.06062700 |
| O  | 2.06258300  | 1.19772400  | 1.71189500  |
| O  | 0.49785300  | 2.37888600  | -0.72810800 |
| S  | 3.04930500  | 2.49177500  | 1.56380000  |
| S  | -1.09524700 | 2.12209300  | -0.97337400 |

|    |              |              |              |
|----|--------------|--------------|--------------|
| C  | 1. 87685300  | 3. 93680600  | 1. 49983900  |
| H  | 2. 46733400  | 4. 83509000  | 1. 30054500  |
| H  | 1. 15070900  | 3. 70655400  | 0. 70962600  |
| H  | 1. 41598600  | 3. 98383900  | 2. 48796200  |
| C  | 3. 61249700  | 2. 48863200  | -0. 21191000 |
| H  | 2. 72087400  | 2. 48158300  | -0. 84871000 |
| H  | 4. 22922300  | 3. 38016800  | -0. 35714700 |
| H  | 4. 20148500  | 1. 57523700  | -0. 33631500 |
| C  | -1. 74959400 | 3. 79988600  | -1. 41232300 |
| H  | -1. 43367100 | 4. 50318500  | -0. 63730000 |
| H  | -1. 32318200 | 4. 05641800  | -2. 38245700 |
| H  | -2. 83609400 | 3. 69740300  | -1. 47528700 |
| C  | -1. 80221800 | 1. 98439300  | 0. 74593900  |
| H  | -1. 23873500 | 1. 18421700  | 1. 23961600  |
| H  | -1. 65427500 | 2. 94069700  | 1. 25576000  |
| H  | -2. 85685600 | 1. 71092600  | 0. 62824700  |
| Cl | 0. 48922000  | -0. 87561900 | -2. 12702900 |
| C  | 1. 90653000  | -1. 44353300 | 0. 79621300  |
| H  | 1. 21981800  | -3. 38256900 | 1. 36163000  |
| H  | 0. 72544300  | -2. 92888600 | -0. 27160900 |
| Ag | -2. 00227600 | -0. 57895600 | -1. 96421500 |
| Cl | -4. 12224400 | 0. 58424500  | -1. 76342000 |
| H  | -1. 80542500 | -2. 79939300 | -0. 30586500 |
| H  | 2. 02500300  | -1. 07405900 | 1. 82524100  |
| C  | 3. 22606000  | -1. 69030200 | 0. 18114300  |
| C  | 4. 36829600  | -1. 11864400 | 0. 77024700  |
| C  | 3. 39519900  | -2. 43777600 | -0. 99417900 |
| C  | 5. 62508300  | -1. 27511600 | 0. 20082400  |
| H  | 4. 24725500  | -0. 55025600 | 1. 69319900  |
| C  | 4. 65315700  | -2. 59581600 | -1. 56062300 |
| H  | 2. 52747600  | -2. 87197700 | -1. 48527300 |
| C  | 5. 77256400  | -2. 01365800 | -0. 97125200 |
| H  | 6. 49603500  | -0. 83153800 | 0. 67962400  |
| H  | 4. 75999700  | -3. 17574000 | -2. 47459100 |
| H  | 6. 75561400  | -2. 14139900 | -1. 41867900 |

### H-IM23

|   |              |              |             |
|---|--------------|--------------|-------------|
| C | -2. 79309500 | -2. 22353900 | 0. 28378300 |
| C | -2. 94288100 | -0. 94007900 | 0. 84315900 |
| C | -4. 16177900 | -0. 61226100 | 1. 45306300 |
| C | -5. 17790100 | -1. 55244000 | 1. 50727200 |
| C | -5. 00150400 | -2. 82897900 | 0. 95826300 |
| C | -3. 80589100 | -3. 17410600 | 0. 34233500 |

|    |             |             |             |
|----|-------------|-------------|-------------|
| C  | -1.77544200 | -0.11997800 | 0.66157700  |
| H  | -4.30067200 | 0.38482400  | 1.87000600  |
| H  | -6.12438700 | -1.29786300 | 1.97961900  |
| H  | -5.80855500 | -3.55632000 | 1.01084600  |
| H  | -3.66529600 | -4.16244400 | -0.09009800 |
| S  | -1.17477400 | -2.41990100 | -0.46306100 |
| C  | -0.76693900 | -0.72335900 | -0.01298300 |
| C  | 0.37399300  | 0.15709400  | -2.54366100 |
| Pd | 0.96429900  | 0.08347200  | -0.50056100 |
| O  | 1.86300000  | -2.09694900 | -0.25781400 |
| O  | 1.40826900  | 0.22867100  | 1.67792700  |
| S  | 3.40962600  | -2.52449700 | -0.13239700 |
| S  | 1.12765700  | 1.76855900  | 2.10891500  |
| C  | 4.18758000  | -1.31548500 | 1.05981600  |
| H  | 5.22533600  | -1.62736000 | 1.20596700  |
| H  | 4.09635000  | -0.31068300 | 0.63370000  |
| H  | 3.60376400  | -1.40254300 | 1.97770000  |
| C  | 4.20140100  | -1.89972100 | -1.70303300 |
| H  | 3.96727900  | -0.83268100 | -1.79224400 |
| H  | 5.27675300  | -2.08598800 | -1.63814800 |
| H  | 3.75295000  | -2.48206300 | -2.50962000 |
| C  | 2.83532200  | 2.38313000  | 2.51541300  |
| H  | 3.29300700  | 1.63881100  | 3.17265800  |
| H  | 3.34475800  | 2.43147900  | 1.54886100  |
| H  | 2.75306200  | 3.36478500  | 2.98850100  |
| C  | 0.48714800  | 1.52732500  | 3.83813000  |
| H  | -0.48181300 | 1.03799300  | 3.72536000  |
| H  | 1.19177600  | 0.86956400  | 4.35256200  |
| H  | 0.39194000  | 2.50070400  | 4.32508300  |
| Cl | 3.09529100  | 1.39492900  | -0.93912900 |
| C  | 0.02981300  | 1.41592200  | -2.03910600 |
| H  | 1.32498700  | 0.03640400  | -3.06125600 |
| H  | -0.38174100 | -0.59994300 | -2.74931300 |
| H  | -1.74095800 | 0.92694000  | 0.96498100  |
| H  | 0.80297200  | 2.18582600  | -2.07660000 |
| C  | -1.31308800 | 1.91718600  | -1.73034100 |
| C  | -1.41941000 | 3.14236600  | -1.05973600 |
| C  | -2.48663900 | 1.22444000  | -2.05031000 |
| C  | -2.65915300 | 3.64640900  | -0.68764300 |
| H  | -0.50641500 | 3.68888500  | -0.82033900 |
| C  | -3.72639900 | 1.72895700  | -1.68267800 |
| H  | -2.42850000 | 0.26967500  | -2.57050300 |
| C  | -3.81737100 | 2.93631800  | -0.99375500 |
| H  | -2.72397700 | 4.59731200  | -0.16303300 |

|   |             |            |             |
|---|-------------|------------|-------------|
| H | -4.62697000 | 1.16909900 | -1.92392700 |
| H | -4.79024200 | 3.32656600 | -0.70338500 |

### H-TS9

|    |             |             |             |
|----|-------------|-------------|-------------|
| C  | 3.57818200  | -0.10293900 | -1.09739900 |
| C  | 3.18273900  | -1.35445300 | -0.58136200 |
| C  | 4.17725600  | -2.27114600 | -0.20544400 |
| C  | 5.51256600  | -1.93434800 | -0.35218900 |
| C  | 5.88311300  | -0.68984100 | -0.87814600 |
| C  | 4.91754000  | 0.23341400  | -1.25735300 |
| C  | 1.75638200  | -1.49476900 | -0.51021400 |
| H  | 3.88992900  | -3.24284500 | 0.19385200  |
| H  | 6.28301000  | -2.64510000 | -0.06163500 |
| H  | 6.93622000  | -0.44345200 | -0.99187500 |
| H  | 5.20089400  | 1.20044800  | -1.66678200 |
| S  | 2.15938600  | 0.91685500  | -1.48999900 |
| C  | 1.05857600  | -0.39202800 | -0.91139000 |
| C  | -0.59895500 | -0.60024800 | -2.11894300 |
| Pd | -0.62793600 | 0.18394400  | 0.03001300  |
| O  | -0.84015700 | 2.27488300  | -1.86969600 |
| O  | 0.69174800  | 0.89810600  | 1.62356300  |
| S  | -1.05875600 | 3.73499400  | -1.25558300 |
| S  | 0.74343300  | -0.29922100 | 2.72603000  |
| C  | -0.29347100 | 3.67102200  | 0.44913000  |
| H  | -0.44233000 | 4.64817600  | 0.91735800  |
| H  | -0.76616600 | 2.85690300  | 1.00944000  |
| H  | 0.76734900  | 3.46017100  | 0.29596400  |
| C  | -2.84433600 | 3.72960800  | -0.70619300 |
| H  | -2.99603600 | 2.83774900  | -0.08491700 |
| H  | -3.03906000 | 4.65451000  | -0.15664900 |
| H  | -3.43891300 | 3.68918900  | -1.62039000 |
| C  | -0.14113700 | 0.48981000  | 4.15577400  |
| H  | 0.33313300  | 1.45829200  | 4.33294300  |
| H  | -1.16602100 | 0.61378100  | 3.79304800  |
| H  | -0.08357300 | -0.17350400 | 5.02196400  |
| C  | 2.49953000  | -0.13494100 | 3.30894600  |
| H  | 3.12085600  | -0.47636500 | 2.47734100  |
| H  | 2.67093300  | 0.92540200  | 3.51018900  |
| H  | 2.64157500  | -0.75653700 | 4.19609700  |
| Cl | -2.55885700 | 0.78577500  | 1.44237600  |
| C  | -1.87235400 | -0.59170000 | -1.48270400 |
| H  | -0.35718200 | 0.25413900  | -2.74597900 |
| H  | -0.18721000 | -1.55196600 | -2.44322800 |

|   |             |             |             |
|---|-------------|-------------|-------------|
| H | 1.26548000  | -2.39549000 | -0.14412200 |
| H | -2.50018600 | 0.28349400  | -1.66291100 |
| C | -2.56258500 | -1.81245800 | -1.04266500 |
| C | -3.91020300 | -1.73420000 | -0.67043000 |
| C | -1.92489500 | -3.05921900 | -0.97918100 |
| C | -4.60164100 | -2.86558200 | -0.26016300 |
| H | -4.40089400 | -0.76303400 | -0.68626500 |
| C | -2.61488400 | -4.18964500 | -0.56410600 |
| H | -0.87619600 | -3.14855600 | -1.26082100 |
| C | -3.95744200 | -4.09836500 | -0.20537200 |
| H | -5.64804400 | -2.78391100 | 0.02470900  |
| H | -2.10434500 | -5.14955300 | -0.52511200 |
| H | -4.49920900 | -4.98533400 | 0.11512600  |

## H-IM24

|    |             |             |             |
|----|-------------|-------------|-------------|
| C  | 3.17566900  | -1.66390200 | -1.12285700 |
| C  | 3.15503000  | -1.59378200 | 0.28491300  |
| C  | 4.29668500  | -1.11959600 | 0.94780700  |
| C  | 5.40917600  | -0.73564600 | 0.21491400  |
| C  | 5.40992300  | -0.82507900 | -1.18452700 |
| C  | 4.29285300  | -1.29475800 | -1.86397800 |
| C  | 1.89020700  | -1.97850600 | 0.84243100  |
| H  | 4.29384100  | -1.05510800 | 2.03490500  |
| H  | 6.29580700  | -0.37100500 | 0.72932100  |
| H  | 6.29353600  | -0.52844800 | -1.74505300 |
| H  | 4.28649400  | -1.36164000 | -2.94940400 |
| S  | 1.60204600  | -2.22121800 | -1.75981900 |
| C  | 0.95344500  | -2.31280700 | -0.07420000 |
| C  | -0.49664100 | -2.59281700 | 0.13521900  |
| Pd | -0.66618200 | 0.33698100  | 0.35722300  |
| O  | -0.85698200 | 1.04516500  | -1.66925600 |
| O  | 0.34616300  | 2.30663400  | 0.96930700  |
| S  | -1.86286500 | 2.31192300  | -1.89801300 |
| S  | 1.84508400  | 1.71149700  | 1.17857400  |
| C  | -0.80465300 | 3.79286900  | -1.50274800 |
| H  | -1.45892600 | 4.66729200  | -1.45238100 |
| H  | -0.29621400 | 3.57167400  | -0.55518500 |
| H  | -0.09813400 | 3.88555200  | -2.32969100 |
| C  | -2.96222200 | 2.36759000  | -0.39391300 |
| H  | -2.32391000 | 2.37598300  | 0.49710000  |
| H  | -3.58212100 | 3.26479100  | -0.48198000 |
| H  | -3.56950900 | 1.45843500  | -0.42332400 |
| C  | 2.72572400  | 3.19546600  | 1.87715300  |

|    |             |             |             |
|----|-------------|-------------|-------------|
| H  | 2.46296000  | 4.05534400  | 1.25578300  |
| H  | 2.35076400  | 3.31974600  | 2.89362000  |
| H  | 3.79968600  | 2.99359500  | 1.87269800  |
| C  | 2.54269400  | 1.78239100  | -0.54945200 |
| H  | 1.89430700  | 1.13451300  | -1.14727100 |
| H  | 2.48126100  | 2.81956100  | -0.89159100 |
| H  | 3.57037900  | 1.40674000  | -0.52602700 |
| Cl | -0.59277100 | -0.38970700 | 2.65460000  |
| C  | -1.35560700 | -1.44235500 | -0.37708100 |
| H  | -0.79014700 | -3.52020100 | -0.38632600 |
| H  | -0.65369700 | -2.75468800 | 1.20753200  |
| H  | 1.64727800  | -1.91417000 | 1.90076700  |
| H  | -1.15659300 | -1.28156200 | -1.44704500 |
| C  | -2.81617200 | -1.49012600 | -0.14359200 |
| C  | -3.68753000 | -1.17215800 | -1.19827600 |
| C  | -3.37734600 | -1.79422700 | 1.10667700  |
| C  | -5.06573900 | -1.14614800 | -1.01235100 |
| H  | -3.26496500 | -0.95406200 | -2.17985700 |
| C  | -4.75307800 | -1.76951500 | 1.28987700  |
| H  | -2.71798000 | -1.99618400 | 1.94820600  |
| C  | -5.60497300 | -1.44235600 | 0.23626300  |
| H  | -5.72032400 | -0.90475400 | -1.84788200 |
| H  | -5.16654300 | -1.99961400 | 2.26964700  |
| H  | -6.68211500 | -1.42474900 | 0.38705600  |

## H-IM25

|    |             |             |             |
|----|-------------|-------------|-------------|
| C  | 3.84910000  | 0.50093400  | -0.66687100 |
| C  | 3.94201400  | -0.22391000 | 0.53564900  |
| C  | 5.20625700  | -0.39873200 | 1.11289200  |
| C  | 6.32385200  | 0.14062200  | 0.49695300  |
| C  | 6.20625800  | 0.85753900  | -0.69958400 |
| C  | 4.96458800  | 1.04182600  | -1.29365000 |
| C  | 2.66189300  | -0.68683700 | 1.01256700  |
| H  | 5.30036400  | -0.95833300 | 2.04203300  |
| H  | 7.30497100  | 0.00460800  | 0.94653100  |
| H  | 7.09412000  | 1.27304700  | -1.17065400 |
| H  | 4.86684200  | 1.59326900  | -2.22599900 |
| S  | 2.14602500  | 0.58906300  | -1.23084400 |
| C  | 1.62037800  | -0.35272100 | 0.21556200  |
| Pd | -0.30280700 | -0.69599600 | 0.46832200  |
| O  | -2.39136100 | -1.07874000 | 0.99700300  |
| S  | -3.62167500 | -1.32050700 | -0.04019500 |
| C  | -3.11237200 | -0.57607200 | -1.66929900 |



|    |             |             |             |
|----|-------------|-------------|-------------|
| H  | -3.09989300 | 0.50734400  | -1.52222000 |
| H  | -2.12476300 | -0.97368200 | -1.92956400 |
| H  | -3.88017900 | -0.86055400 | -2.39414400 |
| C  | -3.48213900 | -3.12346100 | -0.48388500 |
| H  | -3.69347700 | -3.66956400 | 0.43635600  |
| H  | -4.23576300 | -3.33390400 | -1.24719600 |
| H  | -2.45749300 | -3.29719400 | -0.82896400 |
| Cl | -0.13380300 | -2.41372100 | -1.18925500 |
| C  | -1.42627000 | 2.69358700  | -0.57642400 |
| C  | -1.60795300 | 2.01441000  | 0.63531000  |
| C  | -2.89508200 | 1.93751100  | 1.18255300  |
| C  | -3.97237600 | 2.51378200  | 0.52199800  |
| C  | -3.78308500 | 3.17504100  | -0.69113200 |
| C  | -2.50550100 | 3.26606600  | -1.23857600 |
| H  | -0.42429500 | 2.74887600  | -1.00232900 |
| H  | -3.05026800 | 1.42044500  | 2.12606700  |
| H  | -4.96677800 | 2.45199600  | 0.95841800  |
| H  | -4.62916900 | 3.62867900  | -1.20222300 |
| H  | -2.34942800 | 3.78547100  | -2.18099700 |
| C  | -0.42852200 | 1.40180800  | 1.26142200  |
| H  | 0.52233100  | 1.83863600  | 0.95038400  |
| C  | -0.39695800 | 0.49289500  | 2.30340500  |
| H  | -1.30665200 | 0.13583500  | 2.78299200  |
| H  | 0.54282300  | 0.31321300  | 2.82078600  |
| H  | 2.54729900  | -1.27181700 | 1.92252300  |

## H-TS10

|    |             |             |             |
|----|-------------|-------------|-------------|
| C  | -4.01699400 | -0.04826900 | -0.38787300 |
| C  | -3.48162500 | -0.73639700 | 0.71989100  |
| C  | -4.35511900 | -1.16340600 | 1.73152500  |
| C  | -5.70886600 | -0.90154200 | 1.62263000  |
| C  | -6.21804800 | -0.21529800 | 0.51136100  |
| C  | -5.37607200 | 0.21792400  | -0.50302500 |
| C  | -2.06367700 | -0.91085100 | 0.62937700  |
| H  | -3.95830500 | -1.69069800 | 2.59717500  |
| H  | -6.38713500 | -1.22905100 | 2.40700400  |
| H  | -7.28508200 | -0.01707200 | 0.44296300  |
| H  | -5.76686700 | 0.75350000  | -1.36477400 |
| S  | -2.73484900 | 0.40516900  | -1.54856400 |
| C  | -1.49393600 | -0.36357200 | -0.48192000 |
| C  | -0.24934000 | -1.57579400 | -1.52785600 |
| Pd | 0.36243500  | 0.45981400  | -0.55111100 |
| O  | 2.32723600  | 1.28193700  | -0.88200200 |

|    |             |             |             |
|----|-------------|-------------|-------------|
| S  | 3.31449700  | 1.77273800  | 0.31955400  |
| C  | 2.67273100  | 0.99011600  | 1.88219800  |
| H  | 3.26904300  | 1.39405400  | 2.70516000  |
| H  | 1.60908200  | 1.24599600  | 1.96705200  |
| H  | 2.83158700  | -0.08669700 | 1.77606600  |
| C  | 2.78961500  | 3.53100900  | 0.63733900  |
| H  | 1.70725100  | 3.51956200  | 0.81246700  |
| H  | 3.36550100  | 3.89569300  | 1.49212500  |
| H  | 3.04416300  | 4.07970400  | -0.27037700 |
| Cl | -0.42985400 | 2.30603500  | 0.84390600  |
| C  | 1.12945800  | -1.23893000 | -1.55422800 |
| H  | -0.55869500 | -2.43529600 | -0.93986600 |
| H  | -0.81335800 | -1.44896000 | -2.44826100 |
| C  | 2.13057500  | -1.83202800 | -0.65812900 |
| C  | 3.49134300  | -1.65787800 | -0.94799200 |
| C  | 1.78287500  | -2.52242100 | 0.51245200  |
| C  | 4.47095000  | -2.15785000 | -0.09963100 |
| H  | 3.76849500  | -1.10258300 | -1.84220500 |
| C  | 2.76256900  | -3.02043200 | 1.36116400  |
| H  | 0.73315700  | -2.65533700 | 0.77161000  |
| C  | 4.11172100  | -2.83997400 | 1.06030600  |
| H  | 5.52090700  | -2.01282200 | -0.34396300 |
| H  | 2.47249500  | -3.55190300 | 2.26475400  |
| H  | 4.87733100  | -3.23214600 | 1.72538400  |
| H  | 1.52570000  | -0.78252500 | -2.46427400 |
| H  | -1.48098500 | -1.42592100 | 1.39131400  |

## H-IM26

|    |             |             |             |
|----|-------------|-------------|-------------|
| C  | 4.36937200  | -0.41150700 | -0.52100000 |
| C  | 4.60148700  | 0.64572600  | 0.37854900  |
| C  | 5.92388600  | 1.03361300  | 0.63228000  |
| C  | 6.96288400  | 0.37291000  | 0.00011900  |
| C  | 6.70695200  | -0.67781800 | -0.89032400 |
| C  | 5.40656100  | -1.07952300 | -1.16038400 |
| C  | 3.38340000  | 1.18075500  | 0.91927400  |
| H  | 6.12270100  | 1.84954000  | 1.32452700  |
| H  | 7.99001100  | 0.67035300  | 0.19699000  |
| H  | 7.53588200  | -1.18700000 | -1.37596500 |
| H  | 5.20367300  | -1.89537500 | -1.84959800 |
| S  | 2.62057000  | -0.74754900 | -0.69831700 |
| C  | 2.26367900  | 0.57728000  | 0.46012300  |
| C  | 0.85669100  | 0.88759000  | 0.81823400  |
| Pd | -0.86864800 | -0.67702400 | 0.34835200  |

|    |             |             |             |
|----|-------------|-------------|-------------|
| O  | -2.10809500 | -0.81988100 | -1.38599000 |
| S  | -3.69843600 | -1.16135800 | -1.24378500 |
| C  | -4.20436300 | -0.47413500 | 0.40945900  |
| H  | -5.26316500 | -0.71133700 | 0.54596900  |
| H  | -3.56577000 | -0.93691100 | 1.17483600  |
| H  | -4.04832300 | 0.60670100  | 0.34434400  |
| C  | -3.75599400 | -2.97886200 | -0.84834500 |
| H  | -3.10421000 | -3.15402700 | 0.01858800  |
| H  | -4.80128800 | -3.23319300 | -0.65296600 |
| H  | -3.39051400 | -3.48520800 | -1.74272400 |
| C1 | -1.62659200 | -2.50243500 | 1.82259100  |
| C  | -0.09534300 | 1.10085300  | -0.30250800 |
| H  | 0.47157900  | -0.02206400 | 1.47168000  |
| H  | 0.83207700  | 1.68694200  | 1.57110500  |
| C  | -1.23064600 | 2.01925200  | -0.19980300 |
| C  | -1.90532800 | 2.40112800  | -1.37114800 |
| C  | -1.74560100 | 2.45023800  | 1.03480500  |
| C  | -3.05592400 | 3.17422400  | -1.31098200 |
| H  | -1.52043700 | 2.06129200  | -2.33079300 |
| C  | -2.89752300 | 3.22340500  | 1.09248300  |
| H  | -1.25493000 | 2.15913700  | 1.96243100  |
| C  | -3.55971000 | 3.58719600  | -0.07856300 |
| H  | -3.56298600 | 3.45926300  | -2.23004500 |
| H  | -3.28137500 | 3.54524200  | 2.05785000  |
| H  | -4.45938700 | 4.19615800  | -0.03162400 |
| H  | 0.31543300  | 0.98368600  | -1.31001500 |
| H  | 3.35465200  | 1.99890100  | 1.63514800  |
